# Supplementary material for: Zinc intoxication induces ferroptosis in A549 human lung cells
Source: Royal Society of Chemistry journal article supplement (doi:10.1039/c8mt00360b), 2019-04-10
Supplement: c8mt00360b3.xlsx [file c8mt00360b3.xlsx]

## Sheet: Sheet1
test_id	gene_id	gene	locus	sample_1	sample_2	status	value_1	value_2	log2(fold_change)	test_stat	p_value	q_value	significant
XLOC_000001	XLOC_000001	DDX11L1	chr1:11868-31109	Control_1_hr	Zn_1_hr	NOTEST	0	0.0143641	inf	0	1	1	no
XLOC_000002	XLOC_000002	MIR1302-9,RP11-34P13.3	chr1:11868-31109	Control_1_hr	Zn_1_hr	NOTEST	0	0	0	0	1	1	no
XLOC_000003	XLOC_000003	OR4G4P	chr1:52472-53312	Control_1_hr	Zn_1_hr	NOTEST	0	0	0	0	1	1	no
XLOC_000004	XLOC_000004	OR4G11P	chr1:62947-63887	Control_1_hr	Zn_1_hr	NOTEST	0.0168023	0	#NAME?	0	1	1	no
XLOC_000005	XLOC_000005	OR4F5	chr1:69090-70008	Control_1_hr	Zn_1_hr	NOTEST	0	0	0	0	1	1	no
XLOC_000006	XLOC_000006	CICP27	chr1:89294-134836	Control_1_hr	Zn_1_hr	NOTEST	0.00350459	0.00470128	0.423805	0	1	1	no
XLOC_000007	XLOC_000007	RP11-34P13.9	chr1:141473-173862	Control_1_hr	Zn_1_hr	NOTEST	0	0	0	0	1	1	no
XLOC_000008	XLOC_000008	FO538757.3	chr1:182392-184158	Control_1_hr	Zn_1_hr	NOTEST	0	0	0	0	1	1	no
XLOC_000009	XLOC_000009	FO538757.1	chr1:200879-201017	Control_1_hr	Zn_1_hr	NOTEST	0	0	0	0	1	1	no
XLOC_000010	XLOC_000010	RP4-669L17.2	chr1:357382-501617	Control_1_hr	Zn_1_hr	NOTEST	0	0	0	0	1	1	no
XLOC_000011	XLOC_000011	WBP1LP7	chr1:357382-501617	Control_1_hr	Zn_1_hr	NOTEST	0	0	0	0	1	1	no
XLOC_000012	XLOC_000012	CICP7	chr1:357382-501617	Control_1_hr	Zn_1_hr	NOTEST	0	0	0	0	1	1	no
XLOC_000013	XLOC_000013	RP5-857K21.2	chr1:585988-597498	Control_1_hr	Zn_1_hr	NOTEST	0	0	0	0	1	1	no
XLOC_000014	XLOC_000014	MTND1P23	chr1:601435-724903	Control_1_hr	Zn_1_hr	OK	4.73413	4.10691	-0.205046	-0.0634615	0.9243	1	no
XLOC_000015	XLOC_000015	MTND2P28	chr1:601435-724903	Control_1_hr	Zn_1_hr	OK	119.484	118.049	-0.0174302	-0.0578852	0.9206	1	no
XLOC_000016	XLOC_000016	AC114498.1	chr1:601435-724903	Control_1_hr	Zn_1_hr	NOTEST	0	0	0	0	1	1	no
XLOC_000017	XLOC_000017	RP5-857K21.6	chr1:601435-724903	Control_1_hr	Zn_1_hr	OK	17.0907	14.6537	-0.221941	-0.330008	0.56935	1	no
XLOC_000018	XLOC_000018	RP5-857K21.7	chr1:601435-724903	Control_1_hr	Zn_1_hr	OK	3.60856	3.31314	-0.123224	-0.0546583	0.6219	1	no
XLOC_000019	XLOC_000019	MTATP6P1,MTATP8P1,RP5-857K21.11	chr1:601435-724903	Control_1_hr	Zn_1_hr	OK	583.55	534.127	-0.127672	-0.670035	0.2199	1	no
XLOC_000020	XLOC_000020	WBP1LP6	chr1:601435-724903	Control_1_hr	Zn_1_hr	NOTEST	0	0	0	0	1	1	no
XLOC_000021	XLOC_000021	CICP3	chr1:601435-724903	Control_1_hr	Zn_1_hr	NOTEST	0	0	0	0	1	1	no
XLOC_000022	XLOC_000022	RP11-206L10.4	chr1:759031-778626	Control_1_hr	Zn_1_hr	NOTEST	0	0	0	0	1	1	no
XLOC_000023	XLOC_000023	RP11-206L10.9	chr1:778769-819837	Control_1_hr	Zn_1_hr	OK	0.524079	0.392173	-0.418294	-0.213685	0.29945	1	no
XLOC_000024	XLOC_000024	FAM87B	chr1:778769-819837	Control_1_hr	Zn_1_hr	NOTEST	0.0106494	0.00518753	-1.03765	0	1	1	no
XLOC_000025	XLOC_000025	LINC01128	chr1:825137-859446	Control_1_hr	Zn_1_hr	OK	2.70399	2.77091	0.0352732	0.0744911	0.8801	1	no
XLOC_000026	XLOC_000026	TUBB8P11	chr1:868070-876903	Control_1_hr	Zn_1_hr	NOTEST	0.0145361	0	#NAME?	0	1	1	no
XLOC_000027	XLOC_000027	RP11-54O7.16	chr1:904833-915976	Control_1_hr	Zn_1_hr	NOTEST	0.224888	0.184217	-0.2878	0	1	1	no
XLOC_000028	XLOC_000028	RP11-54O7.1,RP11-54O7.2	chr1:904833-915976	Control_1_hr	Zn_1_hr	OK	0.735645	0.759592	0.0462142	0.0639572	0.89505	1	no
XLOC_000029	XLOC_000029	SAMD11	chr1:924879-959309	Control_1_hr	Zn_1_hr	OK	7.73856	6.68188	-0.211811	-0.400486	0.4182	1	no
XLOC_000030	XLOC_000030	AL645608.1,KLHL17	chr1:960586-965715	Control_1_hr	Zn_1_hr	OK	12.4213	12.6376	0.0249083	0.0770646	0.8867	1	no
XLOC_000031	XLOC_000031	PLEKHN1	chr1:966496-982093	Control_1_hr	Zn_1_hr	OK	2.30374	2.11976	-0.120078	-0.328551	0.48655	1	no
XLOC_000032	XLOC_000032	ISG15	chr1:1001137-1014541	Control_1_hr	Zn_1_hr	OK	5.71596	5.98175	0.0655733	0.288346	0.6103	1	no
XLOC_000033	XLOC_000033	AGRN,RP11-54O7.14	chr1:1020122-1056118	Control_1_hr	Zn_1_hr	OK	79.4768	79.9076	0.00779737	0.0267192	0.94595	1	no
XLOC_000034	XLOC_000034	RP11-465B22.3	chr1:1059733-1069355	Control_1_hr	Zn_1_hr	OK	9.57637	10.4126	0.120776	0.552465	0.3244	1	no
XLOC_000035	XLOC_000035	LINC01342	chr1:1137016-1144056	Control_1_hr	Zn_1_hr	NOTEST	0	0	0	0	1	1	no
XLOC_000036	XLOC_000036	MIR200B	chr1:1167091-1167202	Control_1_hr	Zn_1_hr	NOTEST	0	0	0	0	1	1	no
XLOC_000037	XLOC_000037	MIR200A	chr1:1167845-1167956	Control_1_hr	Zn_1_hr	NOTEST	0	0	0	0	1	1	no
XLOC_000038	XLOC_000038	MIR429	chr1:1169004-1169087	Control_1_hr	Zn_1_hr	NOTEST	0	0	0	0	1	1	no
XLOC_000039	XLOC_000039	RP11-465B22.8	chr1:1169356-1170343	Control_1_hr	Zn_1_hr	NOTEST	0.345241	0.320034	-0.10938	0	1	1	no
XLOC_000040	XLOC_000040	TTLL10	chr1:1173055-1197935	Control_1_hr	Zn_1_hr	NOTEST	0.005918	0	#NAME?	0	1	1	no
XLOC_000041	XLOC_000041	B3GALT6	chr1:1232264-1235041	Control_1_hr	Zn_1_hr	OK	12.3308	12.2837	-0.00552557	-0.0347144	0.9526	1	no
XLOC_000042	XLOC_000042	RP5-902P8.10,SCNN1D	chr1:1275222-1292029	Control_1_hr	Zn_1_hr	OK	3.93469	4.08615	0.0544923	0.0783536	0.86405	1	no
XLOC_000043	XLOC_000043	PUSL1	chr1:1292375-1324691	Control_1_hr	Zn_1_hr	OK	9.88692	10.4162	0.0752399	0.141419	0.80795	1	no
XLOC_000044	XLOC_000044	CPTP	chr1:1324755-1328897	Control_1_hr	Zn_1_hr	OK	11.893	12.3032	0.0489255	0.297595	0.6055	1	no
XLOC_000045	XLOC_000045	TAS1R3	chr1:1331313-1349350	Control_1_hr	Zn_1_hr	NOTEST	0.240225	0.290935	0.27631	0	1	1	no
XLOC_000046	XLOC_000046	RP5-890O3.3	chr1:1378665-1379032	Control_1_hr	Zn_1_hr	NOTEST	0	0	0	0	1	1	no
XLOC_000047	XLOC_000047	RP4-758J18.2	chr1:1399521-1407313	Control_1_hr	Zn_1_hr	OK	7.04967	7.87824	0.160317	0.375811	0.4951	1	no
XLOC_000048	XLOC_000048	RP4-758J18.13	chr1:1409095-1410618	Control_1_hr	Zn_1_hr	OK	1.34103	0.905106	-0.567187	-1.73806	0.0041	0.412175	no
XLOC_000049	XLOC_000049	RP4-758J18.7	chr1:1418419-1422691	Control_1_hr	Zn_1_hr	NOTEST	0	0	0	0	1	1	no
XLOC_000050	XLOC_000050	TMEM88B	chr1:1426127-1427787	Control_1_hr	Zn_1_hr	NOTEST	0	0.0298629	inf	0	1	1	no
XLOC_000051	XLOC_000051	VWA1	chr1:1434860-1442882	Control_1_hr	Zn_1_hr	OK	13.1217	14.4009	0.1342	0.565969	0.32135	1	no
XLOC_000052	XLOC_000052	ATAD3C	chr1:1449688-1470158	Control_1_hr	Zn_1_hr	NOTEST	0.00441439	0.00646288	0.549963	0	1	1	no
XLOC_000053	XLOC_000053	ATAD3B	chr1:1471768-1497848	Control_1_hr	Zn_1_hr	OK	0.812198	0.694385	-0.226096	-0.547773	0.2565	1	no
XLOC_000054	XLOC_000054	ATAD3A	chr1:1512150-1534687	Control_1_hr	Zn_1_hr	OK	11.9664	11.6771	-0.0353093	-0.209363	0.7101	1	no
XLOC_000055	XLOC_000055	RP5-832C2.5	chr1:1574974-1577075	Control_1_hr	Zn_1_hr	NOTEST	0.160976	0.168913	0.0694362	0	1	1	no
XLOC_000056	XLOC_000056	AL645728.1	chr1:1579755-1580046	Control_1_hr	Zn_1_hr	NOTEST	0	0	0	0	1	1	no
XLOC_000057	XLOC_000057	MIB2	chr1:1613757-1630610	Control_1_hr	Zn_1_hr	OK	13.1994	12.3373	-0.0974552	-0.31139	0.5711	1	no
XLOC_000058	XLOC_000058	MMP23A,MMP23B	chr1:1632094-1745992	Control_1_hr	Zn_1_hr	NOTEST	0.0758046	0.0688289	-0.13927	0	1	1	no
XLOC_000059	XLOC_000059	RP11-345P4.10	chr1:1632094-1745992	Control_1_hr	Zn_1_hr	NOTEST	0	0	0	0	1	1	no
XLOC_000060	XLOC_000060	RP11-345P4.6,RP11-345P4.7	chr1:1632094-1745992	Control_1_hr	Zn_1_hr	OK	0.34848	0.503237	0.530163	0.227708	0.69115	1	no
XLOC_000061	XLOC_000061	RP1-283E3.4	chr1:1632094-1745992	Control_1_hr	Zn_1_hr	OK	0.639371	0.799694	0.322795	0.163031	0.66565	1	no
XLOC_000062	XLOC_000062	RP1-140A9.1	chr1:1891470-1892658	Control_1_hr	Zn_1_hr	NOTEST	0.0550339	0.0713136	0.373859	0	1	1	no
XLOC_000063	XLOC_000063	CALML6	chr1:1914826-1917296	Control_1_hr	Zn_1_hr	NOTEST	0.329259	0.351282	0.093405	0	1	1	no
XLOC_000064	XLOC_000064	GABRD	chr1:2019323-2030751	Control_1_hr	Zn_1_hr	NOTEST	0.146962	0.219046	0.575786	0	1	1	no
XLOC_000065	XLOC_000065	PRKCZ	chr1:2050469-2220738	Control_1_hr	Zn_1_hr	OK	8.40624	8.14643	-0.0452919	-0.130993	0.79185	1	no
XLOC_000066	XLOC_000066	RP11-181G12.4	chr1:2050469-2220738	Control_1_hr	Zn_1_hr	NOTEST	0.173948	0.057852	-1.58822	0	1	1	no
XLOC_000067	XLOC_000067	SKI	chr1:2228694-2310119	Control_1_hr	Zn_1_hr	OK	11.3604	11.753	0.0490115	0.0780538	0.88495	1	no
XLOC_000068	XLOC_000068	RER1	chr1:2391774-2413797	Control_1_hr	Zn_1_hr	OK	68.4053	67.7052	-0.0148421	-0.0789264	0.8937	1	no
XLOC_000069	XLOC_000069	PLCH2	chr1:2425979-2505530	Control_1_hr	Zn_1_hr	NOTEST	0	0	0	0	1	1	no
XLOC_000070	XLOC_000070	RP3-395M20.12	chr1:2546464-2547460	Control_1_hr	Zn_1_hr	NOTEST	0	0	0	0	1	1	no
XLOC_000071	XLOC_000071	TNFRSF14	chr1:2549919-2565382	Control_1_hr	Zn_1_hr	NOTEST	0	0	0	0	1	1	no
XLOC_000072	XLOC_000072	RP3-395M20.7	chr1:2566409-2569888	Control_1_hr	Zn_1_hr	NOTEST	0	0	0	0	1	1	no
XLOC_000073	XLOC_000073	RP3-395M20.9	chr1:2581559-2584533	Control_1_hr	Zn_1_hr	NOTEST	0	0	0	0	1	1	no
XLOC_000074	XLOC_000074	FAM213B	chr1:2586490-2801721	Control_1_hr	Zn_1_hr	NOTEST	0	0	0	0	1	1	no
XLOC_000075	XLOC_000075	RP13-436F16.1	chr1:2586490-2801721	Control_1_hr	Zn_1_hr	NOTEST	0	0	0	0	1	1	no
XLOC_000076	XLOC_000076	ACTRT2	chr1:3021482-3022903	Control_1_hr	Zn_1_hr	NOTEST	0	0	0	0	1	1	no
XLOC_000077	XLOC_000077	PRDM16	chr1:3069167-3438621	Control_1_hr	Zn_1_hr	NOTEST	0.297899	0.149152	-0.998045	0	1	1	no
XLOC_000078	XLOC_000078	RP11-193J6.1	chr1:3069167-3438621	Control_1_hr	Zn_1_hr	NOTEST	0	0.00366709	inf	0	1	1	no
XLOC_000079	XLOC_000079	ARHGEF16	chr1:3454425-3481113	Control_1_hr	Zn_1_hr	OK	2.97945	2.96443	-0.00728827	-0.0398246	0.94235	1	no
XLOC_000080	XLOC_000080	RP11-168F9.2	chr1:3487245-3487627	Control_1_hr	Zn_1_hr	NOTEST	0.284512	0	#NAME?	0	1	1	no
XLOC_000081	XLOC_000081	TPRG1L	chr1:3625001-3630127	Control_1_hr	Zn_1_hr	OK	13.7118	13.721	0.000959671	0.00602916	0.9922	1	no
XLOC_000082	XLOC_000082	TP73	chr1:3630766-3747336	Control_1_hr	Zn_1_hr	NOTEST	0.161057	0.198392	0.30078	0	1	1	no
XLOC_000083	XLOC_000083	TP73-AS1	chr1:3630766-3747336	Control_1_hr	Zn_1_hr	NOTEST	0	0	0	0	1	1	no
XLOC_000084	XLOC_000084	CCDC27	chr1:3752397-3771645	Control_1_hr	Zn_1_hr	NOTEST	0	0.00398105	inf	0	1	1	no
XLOC_000085	XLOC_000085	SMIM1	chr1:3772787-3775982	Control_1_hr	Zn_1_hr	OK	0.839066	0.66547	-0.334412	-0.308947	0.48555	1	no
XLOC_000086	XLOC_000086	RN7SL574P	chr1:3778557-3796504	Control_1_hr	Zn_1_hr	NOTEST	0.212294	0.15765	-0.429341	0	1	1	no
XLOC_000087	XLOC_000087	RP1-286D6.5	chr1:3778557-3796504	Control_1_hr	Zn_1_hr	OK	1.4546	1.68414	0.211389	0.129287	0.8259	1	no
XLOC_000088	XLOC_000088	DFFB	chr1:3857266-3885429	Control_1_hr	Zn_1_hr	OK	2.06191	2.11933	0.0396244	0.0978095	0.8453	1	no
XLOC_000089	XLOC_000089	LINC01134	chr1:3900371-3917225	Control_1_hr	Zn_1_hr	NOTEST	0.249851	0.181535	-0.460822	0	1	1	no
XLOC_000090	XLOC_000090	LINC01346	chr1:3940612-3955262	Control_1_hr	Zn_1_hr	NOTEST	0	0	0	0	1	1	no
XLOC_000091	XLOC_000091	RP5-1166F10.1	chr1:4412050-4424687	Control_1_hr	Zn_1_hr	NOTEST	0.019838	0	#NAME?	0	1	1	no
XLOC_000092	XLOC_000092	RP1-37J18.2	chr1:4571547-4583421	Control_1_hr	Zn_1_hr	NOTEST	0	0	0	0	1	1	no
XLOC_000093	XLOC_000093	AJAP1	chr1:4654731-4792534	Control_1_hr	Zn_1_hr	NOTEST	0.00344708	0.0216868	2.65337	0	1	1	no
XLOC_000094	XLOC_000094	RP1-58B11.1	chr1:5492977-5494674	Control_1_hr	Zn_1_hr	NOTEST	0	0	0	0	1	1	no
XLOC_000095	XLOC_000095	MIR4417	chr1:5564070-5564143	Control_1_hr	Zn_1_hr	NOTEST	0	0	0	0	1	1	no
XLOC_000096	XLOC_000096	KCNAB2	chr1:5862810-6101193	Control_1_hr	Zn_1_hr	OK	22.9476	23.2575	0.0193561	0.0727737	0.89355	1	no
XLOC_000097	XLOC_000097	RNF207	chr1:6181268-6235972	Control_1_hr	Zn_1_hr	OK	24.7552	22.8066	-0.11828	-0.135427	0.77965	1	no
XLOC_000098	XLOC_000098	LINC00337	chr1:6236239-6239444	Control_1_hr	Zn_1_hr	OK	1.19247	0.914839	-0.382366	-0.989377	0.0832	1	no
XLOC_000099	XLOC_000099	HES3	chr1:6244191-6245578	Control_1_hr	Zn_1_hr	NOTEST	0	0	0	0	1	1	no
XLOC_000100	XLOC_000100	RP1-202O8.3	chr1:6264268-6394391	Control_1_hr	Zn_1_hr	NOTEST	0	0	0	0	1	1	no
XLOC_000101	XLOC_000101	ESPN	chr1:6424787-6520061	Control_1_hr	Zn_1_hr	NOTEST	0.128138	0.127195	-0.010659	0	1	1	no
XLOC_000102	XLOC_000102	RNU6-731P	chr1:6521346-6554535	Control_1_hr	Zn_1_hr	NOTEST	0	0	0	0	1	1	no
XLOC_000103	XLOC_000103	RP11-58A11.2	chr1:6521346-6554535	Control_1_hr	Zn_1_hr	NOTEST	0	0.185397	inf	0	1	1	no
XLOC_000104	XLOC_000104	TAS1R1	chr1:6555180-6579757	Control_1_hr	Zn_1_hr	NOTEST	0.00781223	0.0417286	2.41723	0	1	1	no
XLOC_000105	XLOC_000105	ZBTB48	chr1:6580000-6589280	Control_1_hr	Zn_1_hr	OK	9.63961	9.15699	-0.0741019	-0.164075	0.78155	1	no
XLOC_000106	XLOC_000106	PHF13	chr1:6590723-6624033	Control_1_hr	Zn_1_hr	OK	5.91853	5.19699	-0.187561	-0.656341	0.2508	1	no
XLOC_000107	XLOC_000107	THAP3	chr1:6624865-6701924	Control_1_hr	Zn_1_hr	OK	8.67914	7.34171	-0.241436	-0.425683	0.426	1	no
XLOC_000108	XLOC_000108	RP11-242F24.1	chr1:6724636-6730012	Control_1_hr	Zn_1_hr	NOTEST	0	0.0200515	inf	0	1	1	no
XLOC_000109	XLOC_000109	CAMTA1	chr1:6785323-7769706	Control_1_hr	Zn_1_hr	OK	51.9913	51.0549	-0.0262198	-0.143778	0.8	1	no
XLOC_000110	XLOC_000110	RNU1-8P	chr1:6785323-7769706	Control_1_hr	Zn_1_hr	NOTEST	0	0	0	0	1	1	no
XLOC_000111	XLOC_000111	Z98052.1	chr1:6785323-7769706	Control_1_hr	Zn_1_hr	NOTEST	0	0	0	0	1	1	no
XLOC_000112	XLOC_000112	CAMTA1-IT1	chr1:6785323-7769706	Control_1_hr	Zn_1_hr	NOTEST	0	0.0454875	inf	0	1	1	no
XLOC_000113	XLOC_000113	VAMP3	chr1:7771268-7781432	Control_1_hr	Zn_1_hr	OK	39.6626	41.599	0.0687689	0.364892	0.46995	1	no
XLOC_000114	XLOC_000114	RP3-467L1.6	chr1:7771268-7781432	Control_1_hr	Zn_1_hr	OK	0.363821	0.554336	0.607532	0.160085	0.77865	1	no
XLOC_000115	XLOC_000115	PER3	chr1:7784319-7853512	Control_1_hr	Zn_1_hr	OK	1.87117	1.85279	-0.014238	-0.0416591	0.9342	1	no
XLOC_000116	XLOC_000116	RP5-892F13.2	chr1:7915893-7943165	Control_1_hr	Zn_1_hr	NOTEST	0	0.101742	inf	0	1	1	no
XLOC_000117	XLOC_000117	PARK7	chr1:7954290-7985505	Control_1_hr	Zn_1_hr	OK	263.034	260.993	-0.0112409	-0.0719798	0.89795	1	no
XLOC_000118	XLOC_000118	RP11-431K24.1	chr1:8026737-8122702	Control_1_hr	Zn_1_hr	NOTEST	0.016929	0.0330348	0.964493	0	1	1	no
XLOC_000119	XLOC_000119	RP11-431K24.2	chr1:8189823-8192770	Control_1_hr	Zn_1_hr	NOTEST	0	0	0	0	1	1	no
XLOC_000120	XLOC_000120	RP11-431K24.3	chr1:8208671-8215210	Control_1_hr	Zn_1_hr	NOTEST	0	0	0	0	1	1	no
XLOC_000121	XLOC_000121	SLC45A1	chr1:8317825-8344167	Control_1_hr	Zn_1_hr	OK	1.66052	1.52192	-0.125743	-0.401921	0.4411	1	no
XLOC_000122	XLOC_000122	Y_RNA	chr1:8317825-8344167	Control_1_hr	Zn_1_hr	NOTEST	0	0	0	0	1	1	no
XLOC_000123	XLOC_000123	RP5-1115A15.1	chr1:8352396-8817643	Control_1_hr	Zn_1_hr	NOTEST	0	0.106019	inf	0	1	1	no
XLOC_000124	XLOC_000124	RP5-1115A15.2	chr1:8352396-8817643	Control_1_hr	Zn_1_hr	NOTEST	0	0	0	0	1	1	no
XLOC_000125	XLOC_000125	RPL7P11	chr1:8352396-8817643	Control_1_hr	Zn_1_hr	NOTEST	0.189351	0.102274	-0.88862	0	1	1	no
XLOC_000126	XLOC_000126	RP4-633I8.3	chr1:8352396-8817643	Control_1_hr	Zn_1_hr	NOTEST	0	0	0	0	1	1	no
XLOC_000127	XLOC_000127	RP11-185B14.1	chr1:8831006-8831375	Control_1_hr	Zn_1_hr	NOTEST	0.0682265	0	#NAME?	0	1	1	no
XLOC_000128	XLOC_000128	Metazoa_SRP	chr1:8861001-8879894	Control_1_hr	Zn_1_hr	OK	4.59422	4.24538	-0.113926	-0.00859547	0.9359	1	no
XLOC_000129	XLOC_000129	ENO1-AS1	chr1:8861001-8879894	Control_1_hr	Zn_1_hr	OK	0.617443	0.309469	-0.996512	-0.0410622	0.56505	1	no
XLOC_000130	XLOC_000130	HMGN2P17	chr1:8893408-8894151	Control_1_hr	Zn_1_hr	NOTEST	0	0.0430955	inf	0	1	1	no
XLOC_000131	XLOC_000131	RP3-477M7.6	chr1:8909741-8909904	Control_1_hr	Zn_1_hr	NOTEST	0.753756	0	#NAME?	0	1	1	no
XLOC_000132	XLOC_000132	CA6	chr1:8945866-8975092	Control_1_hr	Zn_1_hr	NOTEST	0.0120427	0	#NAME?	0	1	1	no
XLOC_000133	XLOC_000133	AL158048.1,SCARNA16	chr1:9035106-9088478	Control_1_hr	Zn_1_hr	NOTEST	0	0	0	0	1	1	no
XLOC_000134	XLOC_000134	RP3-510D11.2	chr1:9182006-9202619	Control_1_hr	Zn_1_hr	OK	0.480252	0.641374	0.417372	0.655831	0.2445	1	no
XLOC_000135	XLOC_000135	H6PD	chr1:9234774-9271337	Control_1_hr	Zn_1_hr	OK	4.22997	4.31343	0.0281873	0.161937	0.77365	1	no
XLOC_000136	XLOC_000136	SPSB1	chr1:9292879-9369532	Control_1_hr	Zn_1_hr	OK	15.5346	15.9022	0.0337418	0.162158	0.77355	1	no
XLOC_000137	XLOC_000137	SLC25A33	chr1:9539481-9585179	Control_1_hr	Zn_1_hr	OK	1.42065	1.41905	-0.00161788	-0.00933884	0.9874	1	no
XLOC_000138	XLOC_000138	RP13-15M17.1	chr1:9539481-9585179	Control_1_hr	Zn_1_hr	NOTEST	0.187103	0.083227	-1.16871	0	1	1	no
XLOC_000139	XLOC_000139	TMEM201	chr1:9588921-9614873	Control_1_hr	Zn_1_hr	OK	12.4642	12.5203	0.00648213	0.0390096	0.94195	1	no
XLOC_000140	XLOC_000140	PIK3CD	chr1:9651731-9824526	Control_1_hr	Zn_1_hr	OK	3.08559	2.85587	-0.111615	-0.108485	0.7605	1	no
XLOC_000141	XLOC_000141	MZT1P1	chr1:9651731-9824526	Control_1_hr	Zn_1_hr	OK	0.920196	0.363681	-1.33927	-0.169101	0.4947	1	no
XLOC_000142	XLOC_000142	RP11-84A14.5	chr1:9848275-9910336	Control_1_hr	Zn_1_hr	NOTEST	0	0	0	0	1	1	no
XLOC_000143	XLOC_000143	RP11-84A14.4	chr1:9922112-9985501	Control_1_hr	Zn_1_hr	NOTEST	0.22084	0.0536535	-2.04126	0	1	1	no
XLOC_000144	XLOC_000144	NMNAT1,RP11-807G9.2	chr1:9922112-9985501	Control_1_hr	Zn_1_hr	OK	1.99996	1.7485	-0.193852	-0.308858	0.543	1	no
XLOC_000145	XLOC_000145	RN7SKP269	chr1:9922112-9985501	Control_1_hr	Zn_1_hr	OK	0.546735	0.285377	-0.937971	-0.256722	0.71005	1	no
XLOC_000146	XLOC_000146	MIR5697	chr1:9922112-9985501	Control_1_hr	Zn_1_hr	NOTEST	0	0	0	0	1	1	no
XLOC_000147	XLOC_000147	RBP7	chr1:9997205-10016020	Control_1_hr	Zn_1_hr	OK	1.04978	1.27205	0.277068	0.502657	0.38185	1	no
XLOC_000148	XLOC_000148	UBE4B	chr1:10032831-10181239	Control_1_hr	Zn_1_hr	OK	12.8968	12.6249	-0.0307349	-0.138964	0.7981	1	no
XLOC_000149	XLOC_000149	PGAM1P11	chr1:10032831-10181239	Control_1_hr	Zn_1_hr	NOTEST	0.0255937	0	#NAME?	0	1	1	no
XLOC_000150	XLOC_000150	RNU6-828P	chr1:10032831-10181239	Control_1_hr	Zn_1_hr	NOTEST	0	0	0	0	1	1	no
XLOC_000151	XLOC_000151	KIF1B,RN7SL731P	chr1:10210804-10381603	Control_1_hr	Zn_1_hr	OK	8.04526	8.13803	0.0165405	0.0310592	0.9298	1	no
XLOC_000152	XLOC_000152	MIR1273D	chr1:10210804-10381603	Control_1_hr	Zn_1_hr	NOTEST	0	0	0	0	1	1	no
XLOC_000153	XLOC_000153	RNU6-37P	chr1:10210804-10381603	Control_1_hr	Zn_1_hr	NOTEST	0	0	0	0	1	1	no
XLOC_000154	XLOC_000154	PGD	chr1:10398591-10420144	Control_1_hr	Zn_1_hr	OK	608.037	621.525	0.0316542	0.187698	0.74145	1	no
XLOC_000155	XLOC_000155	APITD1,APITD1-CORT,CORT	chr1:10429880-10452153	Control_1_hr	Zn_1_hr	OK	37.2827	39.4488	0.0814732	0.48987	0.39375	1	no
XLOC_000156	XLOC_000156	RP5-1113E3.3	chr1:10456521-10630758	Control_1_hr	Zn_1_hr	NOTEST	0	0.0361185	inf	0	1	1	no
XLOC_000157	XLOC_000157	PEX14	chr1:10456521-10630758	Control_1_hr	Zn_1_hr	OK	14.4904	14.8967	0.0399012	0.0949129	0.8664	1	no
XLOC_000158	XLOC_000158	RN7SL614P	chr1:10456521-10630758	Control_1_hr	Zn_1_hr	NOTEST	0	0	0	0	1	1	no
XLOC_000159	XLOC_000159	RP4-734G22.3	chr1:10636603-10796650	Control_1_hr	Zn_1_hr	NOTEST	0.0433698	0.0386397	-0.166607	0	1	1	no
XLOC_000160	XLOC_000160	HSPE1P24	chr1:10895760-10895998	Control_1_hr	Zn_1_hr	NOTEST	0	0	0	0	1	1	no
XLOC_000161	XLOC_000161	RP4-635E18.8,TARDBP	chr1:11012343-11047233	Control_1_hr	Zn_1_hr	OK	163.552	162.918	-0.005596	-0.0283153	0.95765	1	no
XLOC_000162	XLOC_000162	RP4-635E18.7	chr1:11066617-11102100	Control_1_hr	Zn_1_hr	NOTEST	0.165564	0.150642	-0.136265	0	1	1	no
XLOC_000163	XLOC_000163	Metazoa_SRP	chr1:11066617-11102100	Control_1_hr	Zn_1_hr	NOTEST	0	0.195788	inf	0	1	1	no
XLOC_000164	XLOC_000164	RP4-635E18.6	chr1:11066617-11102100	Control_1_hr	Zn_1_hr	OK	1.42313	1.37129	-0.053538	-0.0255787	0.9657	1	no
XLOC_000165	XLOC_000165	MTOR-AS1	chr1:11106534-11262507	Control_1_hr	Zn_1_hr	NOTEST	0	0	0	0	1	1	no
XLOC_000166	XLOC_000166	RNU6-537P	chr1:11106534-11262507	Control_1_hr	Zn_1_hr	NOTEST	0	0	0	0	1	1	no
XLOC_000167	XLOC_000167	ANGPTL7	chr1:11106534-11262507	Control_1_hr	Zn_1_hr	NOTEST	0.0063912	0.0217117	1.76431	0	1	1	no
XLOC_000168	XLOC_000168	RNU6-291P	chr1:11106534-11262507	Control_1_hr	Zn_1_hr	NOTEST	0	0	0	0	1	1	no
XLOC_000169	XLOC_000169	RPL39P6	chr1:11106534-11262507	Control_1_hr	Zn_1_hr	NOTEST	0	1.65714	inf	0	1	1	no
XLOC_000170	XLOC_000170	UBIAD1	chr1:11273205-11296049	Control_1_hr	Zn_1_hr	OK	10.6945	10.9204	0.0301553	0.128939	0.8166	1	no
XLOC_000171	XLOC_000171	PTCHD2	chr1:11479165-11537584	Control_1_hr	Zn_1_hr	NOTEST	0.120273	0.0476963	-1.33437	0	1	1	no
XLOC_000172	XLOC_000172	RP1-69M21.2	chr1:11609530-11613355	Control_1_hr	Zn_1_hr	NOTEST	0	0	0	0	1	1	no
XLOC_000173	XLOC_000173	FBXO44	chr1:11648366-11663327	Control_1_hr	Zn_1_hr	OK	17.4204	15.7019	-0.149841	-0.706906	0.21205	1	no
XLOC_000174	XLOC_000174	FBXO6	chr1:11664123-11674354	Control_1_hr	Zn_1_hr	OK	5.72544	5.67452	-0.012889	-0.0839635	0.88045	1	no
XLOC_000175	XLOC_000175	DRAXIN	chr1:11691728-11725857	Control_1_hr	Zn_1_hr	NOTEST	0.0167511	0.00458768	-1.86842	0	1	1	no
XLOC_000176	XLOC_000176	AGTRAP	chr1:11736083-11754802	Control_1_hr	Zn_1_hr	OK	48.9548	49.7974	0.0246187	0.157504	0.77785	1	no
XLOC_000177	XLOC_000177	C1orf167	chr1:11761786-11848345	Control_1_hr	Zn_1_hr	NOTEST	0.0500972	0.136029	1.44111	0	1	1	no
XLOC_000178	XLOC_000178	CLCN6,NPPA-AS1,NPPA-AS1_1,NPPA-AS1_2,NPPA-AS1_3	chr1:11761786-11848345	Control_1_hr	Zn_1_hr	OK	9.94651	6.96117	-0.514859	-1.39711	0.01365	0.827381	no
XLOC_000179	XLOC_000179	RP5-934G17.6	chr1:11877769-11880406	Control_1_hr	Zn_1_hr	NOTEST	0.166867	0.132957	-0.327737	0	1	1	no
XLOC_000180	XLOC_000180	RNU5E-1	chr1:11908151-11908271	Control_1_hr	Zn_1_hr	NOTEST	0	0	0	0	1	1	no
XLOC_000181	XLOC_000181	PLOD1	chr1:11934204-11975538	Control_1_hr	Zn_1_hr	OK	46.3316	48.4401	0.0642048	0.411604	0.4608	1	no
XLOC_000182	XLOC_000182	MFN2	chr1:11980180-12013514	Control_1_hr	Zn_1_hr	OK	24.0575	25.1242	0.0625884	0.362556	0.4872	1	no
XLOC_000183	XLOC_000183	MIIP	chr1:12019465-12032045	Control_1_hr	Zn_1_hr	OK	13.5447	13.3855	-0.0170592	-0.0854581	0.88305	1	no
XLOC_000184	XLOC_000184	MIR6729	chr1:12019465-12032045	Control_1_hr	Zn_1_hr	NOTEST	0	0	0	0	1	1	no
XLOC_000185	XLOC_000185	TNFRSF8	chr1:12063376-12144207	Control_1_hr	Zn_1_hr	NOTEST	0.0570177	0.0301358	-0.919931	0	1	1	no
XLOC_000186	XLOC_000186	MIR7846,TNFRSF1B	chr1:12166942-12209228	Control_1_hr	Zn_1_hr	NOTEST	0.215577	0.151515	-0.508745	0	1	1	no
XLOC_000187	XLOC_000187	MIR4632	chr1:12166942-12209228	Control_1_hr	Zn_1_hr	NOTEST	0	0	0	0	1	1	no
XLOC_000188	XLOC_000188	VPS13D	chr1:12230066-12512047	Control_1_hr	Zn_1_hr	OK	4.02406	4.34809	0.111731	0.338172	0.4269	1	no
XLOC_000189	XLOC_000189	AC243836.1	chr1:12230066-12512047	Control_1_hr	Zn_1_hr	NOTEST	0	0	0	0	1	1	no
XLOC_000190	XLOC_000190	SNORA59A	chr1:12230066-12512047	Control_1_hr	Zn_1_hr	NOTEST	0	0	0	0	1	1	no
XLOC_000191	XLOC_000191	RP5-888M10.2	chr1:12527723-12528420	Control_1_hr	Zn_1_hr	NOTEST	0	0.122473	inf	0	1	1	no
XLOC_000192	XLOC_000192	AADACL4	chr1:12644546-12667086	Control_1_hr	Zn_1_hr	NOTEST	0	0	0	0	1	1	no
XLOC_000193	XLOC_000193	RP11-474O21.2	chr1:12692908-12693020	Control_1_hr	Zn_1_hr	NOTEST	0	0	0	0	1	1	no
XLOC_000194	XLOC_000194	AADACL3	chr1:12716114-12728759	Control_1_hr	Zn_1_hr	NOTEST	0.0115595	0.00227579	-2.34464	0	1	1	no
XLOC_000195	XLOC_000195	C1orf158	chr1:12746214-12763699	Control_1_hr	Zn_1_hr	NOTEST	0	0.0148795	inf	0	1	1	no
XLOC_000196	XLOC_000196	PRAMEF12	chr1:12774840-12777906	Control_1_hr	Zn_1_hr	NOTEST	0	0.00495798	inf	0	1	1	no
XLOC_000197	XLOC_000197	PRAMEF1	chr1:12791396-12796628	Control_1_hr	Zn_1_hr	NOTEST	0	0	0	0	1	1	no
XLOC_000198	XLOC_000198	PRAMEF2	chr1:12847376-13158092	Control_1_hr	Zn_1_hr	NOTEST	0.00915268	0.00545079	-0.747727	0	1	1	no
XLOC_000199	XLOC_000199	PRAMEF7	chr1:12847376-13158092	Control_1_hr	Zn_1_hr	NOTEST	0	0	0	0	1	1	no
XLOC_000200	XLOC_000200	RNU6-1072P	chr1:12847376-13158092	Control_1_hr	Zn_1_hr	NOTEST	0	0	0	0	1	1	no
XLOC_000201	XLOC_000201	RP11-450I1.2	chr1:12847376-13158092	Control_1_hr	Zn_1_hr	NOTEST	0	0	0	0	1	1	no
XLOC_000202	XLOC_000202	CH17-409J4.2	chr1:12847376-13158092	Control_1_hr	Zn_1_hr	NOTEST	0	0	0	0	1	1	no
XLOC_000203	XLOC_000203	HNRNPCL3,PRAMEF26	chr1:12847376-13158092	Control_1_hr	Zn_1_hr	NOTEST	0	0	0	0	1	1	no
XLOC_000204	XLOC_000204	RP13-221M14.3	chr1:12847376-13158092	Control_1_hr	Zn_1_hr	NOTEST	0	0	0	0	1	1	no
XLOC_000205	XLOC_000205	PRAMEF25	chr1:13172454-13179464	Control_1_hr	Zn_1_hr	NOTEST	0	0	0	0	1	1	no
XLOC_000206	XLOC_000206	RP11-450I1.4	chr1:13245862-13248652	Control_1_hr	Zn_1_hr	NOTEST	0	0	0	0	1	1	no
XLOC_000207	XLOC_000207	PRAMEF5	chr1:13254197-13263435	Control_1_hr	Zn_1_hr	NOTEST	0	0	0	0	1	1	no
XLOC_000208	XLOC_000208	PRAMEF9	chr1:13303508-13322598	Control_1_hr	Zn_1_hr	NOTEST	0	0	0	0	1	1	no
XLOC_000209	XLOC_000209	RP11-219C24.6	chr1:13303508-13322598	Control_1_hr	Zn_1_hr	NOTEST	0	0	0	0	1	1	no
XLOC_000210	XLOC_000210	RP11-219C24.10	chr1:13324038-13324518	Control_1_hr	Zn_1_hr	NOTEST	0	0	0	0	1	1	no
XLOC_000211	XLOC_000211	PRAMEF17	chr1:13389631-13392629	Control_1_hr	Zn_1_hr	NOTEST	0	0	0	0	1	1	no
XLOC_000212	XLOC_000212	PRAMEF20	chr1:13410449-13421328	Control_1_hr	Zn_1_hr	NOTEST	0	0	0	0	1	1	no
XLOC_000213	XLOC_000213	RP4-597A16.2	chr1:13474976-13516270	Control_1_hr	Zn_1_hr	NOTEST	0	0	0	0	1	1	no
XLOC_000214	XLOC_000214	RP4-597A16.3	chr1:13555000-13555694	Control_1_hr	Zn_1_hr	NOTEST	0	0	0	0	1	1	no
XLOC_000215	XLOC_000215	PDPN	chr1:13583464-13617957	Control_1_hr	Zn_1_hr	NOTEST	0	0.023738	inf	0	1	1	no
XLOC_000216	XLOC_000216	PRDM2	chr1:13700197-13825079	Control_1_hr	Zn_1_hr	OK	4.62703	5.05859	0.128648	0.486533	0.34565	1	no
XLOC_000217	XLOC_000217	KAZN	chr1:14598703-15152464	Control_1_hr	Zn_1_hr	OK	1.87913	1.91501	0.0272899	0.116395	0.8223	1	no
XLOC_000218	XLOC_000218	TMEM51	chr1:15152531-15220480	Control_1_hr	Zn_1_hr	OK	25.645	24.8452	-0.0457063	-0.292141	0.61455	1	no
XLOC_000219	XLOC_000219	RP5-903E17.2	chr1:15226372-15227549	Control_1_hr	Zn_1_hr	NOTEST	0.0734068	0.139458	0.925843	0	1	1	no
XLOC_000220	XLOC_000220	FHAD1	chr1:15247271-15400283	Control_1_hr	Zn_1_hr	NOTEST	0.324775	0.329837	0.0223129	0	1	1	no
XLOC_000221	XLOC_000221	EFHD2	chr1:15409894-15430343	Control_1_hr	Zn_1_hr	OK	120.411	120.248	-0.00195167	-0.0131168	0.98315	1	no
XLOC_000222	XLOC_000222	CTRC	chr1:15438438-15449242	Control_1_hr	Zn_1_hr	NOTEST	0.204029	0.068866	-1.56691	0	1	1	no
XLOC_000223	XLOC_000223	CELA2A,CELA2B	chr1:15456727-15526534	Control_1_hr	Zn_1_hr	NOTEST	0	0.0421048	inf	0	1	1	no
XLOC_000224	XLOC_000224	DNAJC16	chr1:15526812-15603626	Control_1_hr	Zn_1_hr	OK	4.46291	4.35854	-0.0341398	-0.0735784	0.886	1	no
XLOC_000225	XLOC_000225	SCARNA21	chr1:15526812-15603626	Control_1_hr	Zn_1_hr	NOTEST	0	0	0	0	1	1	no
XLOC_000226	XLOC_000226	CHCHD2P6	chr1:15604596-15605043	Control_1_hr	Zn_1_hr	OK	41.0755	42.7716	0.0583777	0.381018	0.50145	1	no
XLOC_000227	XLOC_000227	DDI2,RSC1A1	chr1:15617499-15669044	Control_1_hr	Zn_1_hr	OK	5.73993	5.21036	-0.139651	-0.396588	0.4325	1	no
XLOC_000228	XLOC_000228	AL121992.1,PLEKHM2	chr1:15684331-15749896	Control_1_hr	Zn_1_hr	OK	17.9613	18.5205	0.0442308	0.19584	0.72435	1	no
XLOC_000229	XLOC_000229	SLC25A34	chr1:15684331-15749896	Control_1_hr	Zn_1_hr	NOTEST	0.289446	0.272085	-0.0892394	0	1	1	no
XLOC_000230	XLOC_000230	TMEM82	chr1:15684331-15749896	Control_1_hr	Zn_1_hr	NOTEST	0.0357358	0.0301692	-0.244292	0	1	1	no
XLOC_000231	XLOC_000231	FBLIM1	chr1:15756606-15786594	Control_1_hr	Zn_1_hr	OK	21.5657	23.7084	0.136664	0.497934	0.3724	1	no
XLOC_000232	XLOC_000232	Metazoa_SRP	chr1:15756606-15786594	Control_1_hr	Zn_1_hr	NOTEST	0	0.142726	inf	0	1	1	no
XLOC_000233	XLOC_000233	RP11-169K16.6	chr1:15792795-15793285	Control_1_hr	Zn_1_hr	OK	4.21792	4.29376	0.0257106	0.0740921	0.90475	1	no
XLOC_000234	XLOC_000234	RP11-169K16.8	chr1:15828231-15828669	Control_1_hr	Zn_1_hr	OK	198.279	210.304	0.0849404	0.54957	0.3323	1	no
XLOC_000235	XLOC_000235	SPEN	chr1:15834478-15940460	Control_1_hr	Zn_1_hr	OK	16.4622	15.631	-0.0747429	-0.156803	0.7836	1	no
XLOC_000236	XLOC_000236	RP11-5P18.1	chr1:15941868-15976132	Control_1_hr	Zn_1_hr	NOTEST	0	0	0	0	1	1	no
XLOC_000237	XLOC_000237	RP11-5P18.3	chr1:15988181-15988441	Control_1_hr	Zn_1_hr	NOTEST	0	0	0	0	1	1	no
XLOC_000238	XLOC_000238	TBC1D3P6	chr1:15989870-15994751	Control_1_hr	Zn_1_hr	NOTEST	0.0163277	0	#NAME?	0	1	1	no
XLOC_000239	XLOC_000239	C1orf64	chr1:16004235-16008807	Control_1_hr	Zn_1_hr	NOTEST	0.00445317	0	#NAME?	0	1	1	no
XLOC_000240	XLOC_000240	CLCNKA	chr1:16014027-16034050	Control_1_hr	Zn_1_hr	NOTEST	0.0313095	0.0305821	-0.0339146	0	1	1	no
XLOC_000241	XLOC_000241	CLCNKB	chr1:16043735-16057308	Control_1_hr	Zn_1_hr	NOTEST	0.0137471	0.0578381	2.07289	0	1	1	no
XLOC_000242	XLOC_000242	RP11-276H7.2	chr1:16124336-16157329	Control_1_hr	Zn_1_hr	OK	0.397601	0.298843	-0.411932	-0.0756827	0.8108	1	no
XLOC_000243	XLOC_000243	RP11-276H7.3	chr1:16159265-16161883	Control_1_hr	Zn_1_hr	NOTEST	0.210364	0.327557	0.638861	0	1	1	no
XLOC_000244	XLOC_000244	ARHGEF19-AS1	chr1:16197853-16212609	Control_1_hr	Zn_1_hr	NOTEST	0	0	0	0	1	1	no
XLOC_000245	XLOC_000245	SZRD1	chr1:16352574-16437424	Control_1_hr	Zn_1_hr	OK	69.9961	68.9451	-0.0218251	-0.103882	0.8585	1	no
XLOC_000246	XLOC_000246	AL358794.1	chr1:16352574-16437424	Control_1_hr	Zn_1_hr	NOTEST	0	0	0	0	1	1	no
XLOC_000247	XLOC_000247	NECAP2	chr1:16440671-16460078	Control_1_hr	Zn_1_hr	OK	20.5609	21.5301	0.0664476	0.340564	0.5394	1	no
XLOC_000248	XLOC_000248	RP4-798A10.2	chr1:16460947-16499257	Control_1_hr	Zn_1_hr	NOTEST	0.187726	0.207821	0.146717	0	1	1	no
XLOC_000249	XLOC_000249	RP4-798A10.7	chr1:16514644-16515754	Control_1_hr	Zn_1_hr	NOTEST	0.118809	0.114487	-0.0534586	0	1	1	no
XLOC_000250	XLOC_000250	RP4-798A10.4	chr1:16520693-16521796	Control_1_hr	Zn_1_hr	NOTEST	0.0859767	0.0920652	0.09871	0	1	1	no
XLOC_000251	XLOC_000251	FAM231C	chr1:16539065-16539575	Control_1_hr	Zn_1_hr	NOTEST	0.038889	0	#NAME?	0	1	1	no
XLOC_000252	XLOC_000252	AL355149.1	chr1:16548650-16552531	Control_1_hr	Zn_1_hr	NOTEST	0	0	0	0	1	1	no
XLOC_000253	XLOC_000253	RP5-1182A14.5	chr1:16617390-16617729	Control_1_hr	Zn_1_hr	NOTEST	0.0804832	0.144572	0.84503	0	1	1	no
XLOC_000254	XLOC_000254	MST1P2	chr1:16645621-16650289	Control_1_hr	Zn_1_hr	NOTEST	0.251659	0.222282	-0.179077	0	1	1	no
XLOC_000255	XLOC_000255	FAM231A	chr1:16673002-16673512	Control_1_hr	Zn_1_hr	NOTEST	0	0	0	0	1	1	no
XLOC_000256	XLOC_000256	AL021920.1	chr1:16681096-16720157	Control_1_hr	Zn_1_hr	NOTEST	0	0	0	0	1	1	no
XLOC_000257	XLOC_000257	RP1-163M9.7	chr1:16681096-16720157	Control_1_hr	Zn_1_hr	NOTEST	0	0	0	0	1	1	no
XLOC_000258	XLOC_000258	CROCC	chr1:16740272-16972979	Control_1_hr	Zn_1_hr	OK	4.86295	3.9851	-0.287215	-0.775084	0.1538	1	no
XLOC_000259	XLOC_000259	RNU1-4	chr1:16740272-16972979	Control_1_hr	Zn_1_hr	NOTEST	0	0	0	0	1	1	no
XLOC_000260	XLOC_000260	CROCCP4	chr1:16740272-16972979	Control_1_hr	Zn_1_hr	NOTEST	0	0	0	0	1	1	no
XLOC_000261	XLOC_000261	RP11-108M9.2	chr1:16740272-16972979	Control_1_hr	Zn_1_hr	NOTEST	0	0	0	0	1	1	no
XLOC_000262	XLOC_000262	RP11-108M9.3,U1	chr1:16740272-16972979	Control_1_hr	Zn_1_hr	OK	0.5154	0.580425	0.171416	0.126311	0.7295	1	no
XLOC_000263	XLOC_000263	RP11-108M9.5	chr1:16740272-16972979	Control_1_hr	Zn_1_hr	OK	2.6329	2.74442	0.0598494	0.0913421	0.86675	1	no
XLOC_000264	XLOC_000264	RNU1-2	chr1:16740272-16972979	Control_1_hr	Zn_1_hr	NOTEST	0	0	0	0	1	1	no
XLOC_000265	XLOC_000265	RP1-37C10.3	chr1:16974501-17011928	Control_1_hr	Zn_1_hr	NOTEST	0	0.0660291	inf	0	1	1	no
XLOC_000266	XLOC_000266	Y_RNA	chr1:17158196-17158284	Control_1_hr	Zn_1_hr	NOTEST	0	0	0	0	1	1	no
XLOC_000267	XLOC_000267	RP11-380J14.1	chr1:17189782-17197617	Control_1_hr	Zn_1_hr	NOTEST	0	0	0	0	1	1	no
XLOC_000268	XLOC_000268	PADI1	chr1:17205125-17246005	Control_1_hr	Zn_1_hr	NOTEST	0	0	0	0	1	1	no
XLOC_000269	XLOC_000269	PADI3	chr1:17249097-17284233	Control_1_hr	Zn_1_hr	NOTEST	0	0	0	0	1	1	no
XLOC_000270	XLOC_000270	MIR3972	chr1:17249097-17284233	Control_1_hr	Zn_1_hr	NOTEST	0	0	0	0	1	1	no
XLOC_000271	XLOC_000271	PADI4	chr1:17308194-17364004	Control_1_hr	Zn_1_hr	NOTEST	0	0	0	0	1	1	no
XLOC_000272	XLOC_000272	PADI6	chr1:17372195-17401699	Control_1_hr	Zn_1_hr	NOTEST	0	0	0	0	1	1	no
XLOC_000273	XLOC_000273	RP1-20B21.4	chr1:17406759-17439724	Control_1_hr	Zn_1_hr	NOTEST	0	0	0	0	1	1	no
XLOC_000274	XLOC_000274	ARHGEF10L	chr1:17539834-17697874	Control_1_hr	Zn_1_hr	OK	5.94524	6.27719	0.0783825	0.411971	0.45635	1	no
XLOC_000275	XLOC_000275	RP11-473A10.2	chr1:17717686-17749978	Control_1_hr	Zn_1_hr	NOTEST	0	0	0	0	1	1	no
XLOC_000276	XLOC_000276	AL136529.1	chr1:17717686-17749978	Control_1_hr	Zn_1_hr	NOTEST	0	0	0	0	1	1	no
XLOC_000277	XLOC_000277	ACTL8	chr1:17755312-17827063	Control_1_hr	Zn_1_hr	OK	0.687851	0.555789	-0.307559	-0.719228	0.19535	1	no
XLOC_000278	XLOC_000278	RP11-174G17.2	chr1:18065656-18074412	Control_1_hr	Zn_1_hr	NOTEST	0	0.00346691	inf	0	1	1	no
XLOC_000279	XLOC_000279	IGSF21	chr1:18107745-18378483	Control_1_hr	Zn_1_hr	NOTEST	0	0	0	0	1	1	no
XLOC_000280	XLOC_000280	RP11-174G17.3	chr1:18107745-18378483	Control_1_hr	Zn_1_hr	NOTEST	0.00298867	0.00125748	-1.24897	0	1	1	no
XLOC_000281	XLOC_000281	RP11-422P22.1	chr1:18385828-18388514	Control_1_hr	Zn_1_hr	NOTEST	0	0	0	0	1	1	no
XLOC_000282	XLOC_000282	KLHDC7A	chr1:18480981-18486126	Control_1_hr	Zn_1_hr	OK	4.46502	4.36486	-0.0327337	-0.19922	0.72325	1	no
XLOC_000283	XLOC_000283	DYNLL1P3	chr1:18513117-18513383	Control_1_hr	Zn_1_hr	NOTEST	0.140153	0.189895	0.4382	0	1	1	no
XLOC_000284	XLOC_000284	RP1-8B22.2	chr1:18595413-18595636	Control_1_hr	Zn_1_hr	NOTEST	0	0	0	0	1	1	no
XLOC_000285	XLOC_000285	PAX7	chr1:18631005-18748866	Control_1_hr	Zn_1_hr	NOTEST	0.346356	0.215039	-0.687655	0	1	1	no
XLOC_000286	XLOC_000286	RP1-43E13.2	chr1:19210500-19260128	Control_1_hr	Zn_1_hr	NOTEST	0	0.277943	inf	0	1	1	no
XLOC_000287	XLOC_000287	MRTO4	chr1:19210500-19260128	Control_1_hr	Zn_1_hr	OK	37.9064	37.8263	-0.00305137	-0.0115301	0.98175	1	no
XLOC_000288	XLOC_000288	RP4-657E11.10	chr1:19297079-19297903	Control_1_hr	Zn_1_hr	OK	0.466612	0.527662	0.177391	0.163927	0.78815	1	no
XLOC_000289	XLOC_000289	PQLC2	chr1:19312325-19329300	Control_1_hr	Zn_1_hr	OK	15.8432	15.5336	-0.0284766	-0.16183	0.7784	1	no
XLOC_000290	XLOC_000290	RN7SL277P	chr1:19338775-19485539	Control_1_hr	Zn_1_hr	NOTEST	0	0.0774926	inf	0	1	1	no
XLOC_000291	XLOC_000291	RNU4-28P	chr1:19510592-19510733	Control_1_hr	Zn_1_hr	NOTEST	0	0	0	0	1	1	no
XLOC_000292	XLOC_000292	MINOS1,MINOS1-NBL1,NBL1	chr1:19596976-19658456	Control_1_hr	Zn_1_hr	OK	85.3526	79.525	-0.102027	-0.420133	0.4634	1	no
XLOC_000293	XLOC_000293	RP5-1056L3.3	chr1:19596976-19658456	Control_1_hr	Zn_1_hr	OK	34.3332	33.6843	-0.0275279	-0.0560477	0.92385	1	no
XLOC_000294	XLOC_000294	HTR6	chr1:19665286-19679562	Control_1_hr	Zn_1_hr	NOTEST	0.114477	0.0695015	-0.719943	0	1	1	no
XLOC_000295	XLOC_000295	RP11-91K11.2	chr1:19814028-19819502	Control_1_hr	Zn_1_hr	NOTEST	0	0	0	0	1	1	no
XLOC_000296	XLOC_000296	OTUD3	chr1:19882512-19912945	Control_1_hr	Zn_1_hr	OK	2.21204	1.83633	-0.268553	-0.990404	0.0541	1	no
XLOC_000297	XLOC_000297	RN7SL304P	chr1:19970968-19971269	Control_1_hr	Zn_1_hr	NOTEST	0	0	0	0	1	1	no
XLOC_000298	XLOC_000298	PLA2G5	chr1:20028178-20091190	Control_1_hr	Zn_1_hr	NOTEST	0	0	0	0	1	1	no
XLOC_000299	XLOC_000299	PLA2G2F	chr1:20139325-20150386	Control_1_hr	Zn_1_hr	NOTEST	0.024034	0.0529115	1.13851	0	1	1	no
XLOC_000300	XLOC_000300	RP3-340N1.2	chr1:20154337-20160568	Control_1_hr	Zn_1_hr	NOTEST	0.0373726	0.027773	-0.428297	0	1	1	no
XLOC_000301	XLOC_000301	UBXN10	chr1:20184241-20196048	Control_1_hr	Zn_1_hr	NOTEST	0.00597945	0.00146839	-2.02577	0	1	1	no
XLOC_000302	XLOC_000302	RP3-340N1.6	chr1:20243094-20244655	Control_1_hr	Zn_1_hr	NOTEST	0	0	0	0	1	1	no
XLOC_000303	XLOC_000303	VWA5B1	chr1:20290918-20354894	Control_1_hr	Zn_1_hr	NOTEST	0	0.00223347	inf	0	1	1	no
XLOC_000304	XLOC_000304	RPS4XP4	chr1:20525988-20526751	Control_1_hr	Zn_1_hr	NOTEST	0	0	0	0	1	1	no
XLOC_000305	XLOC_000305	FAM43B	chr1:20552438-20555010	Control_1_hr	Zn_1_hr	OK	2.80673	2.85634	0.0252769	0.167073	0.77225	1	no
XLOC_000306	XLOC_000306	CDA	chr1:20588947-20618908	Control_1_hr	Zn_1_hr	OK	19.7239	20.8202	0.078044	0.518775	0.3665	1	no
XLOC_000307	XLOC_000307	MIR6084,PINK1	chr1:20633454-20661544	Control_1_hr	Zn_1_hr	OK	18.4014	18.3753	-0.00205051	-0.00126931	0.9947	1	no
XLOC_000308	XLOC_000308	RP5-930J4.2	chr1:20732879-20733952	Control_1_hr	Zn_1_hr	NOTEST	0.103428	0.2593	1.326	0	1	1	no
XLOC_000309	XLOC_000309	RNU7-200P	chr1:20806291-21176888	Control_1_hr	Zn_1_hr	NOTEST	0	0	0	0	1	1	no
XLOC_000310	XLOC_000310	HSPE1P27	chr1:20806291-21176888	Control_1_hr	Zn_1_hr	NOTEST	0	0	0	0	1	1	no
XLOC_000311	XLOC_000311	RP3-329E20.2	chr1:21217246-21345504	Control_1_hr	Zn_1_hr	NOTEST	0.02445	0.0410723	0.748334	0	1	1	no
XLOC_000312	XLOC_000312	RP5-1071N3.1	chr1:21217246-21345504	Control_1_hr	Zn_1_hr	NOTEST	0.0997958	0.115106	0.205913	0	1	1	no
XLOC_000313	XLOC_000313	PPP1R11P1	chr1:21397986-21398362	Control_1_hr	Zn_1_hr	OK	2.73666	2.56073	-0.0958609	-0.173878	0.76525	1	no
XLOC_000314	XLOC_000314	RP11-293F5.1	chr1:21415897-21417492	Control_1_hr	Zn_1_hr	NOTEST	0	0	0	0	1	1	no
XLOC_000315	XLOC_000315	HS6ST1P1	chr1:21428302-21429536	Control_1_hr	Zn_1_hr	OK	1.04973	0.96627	-0.11952	-0.311663	0.5882	1	no
XLOC_000316	XLOC_000316	CROCCP5	chr1:21434317-21437558	Control_1_hr	Zn_1_hr	NOTEST	0.0196593	0	#NAME?	0	1	1	no
XLOC_000317	XLOC_000317	NBPF3	chr1:21440127-21485005	Control_1_hr	Zn_1_hr	OK	3.40351	3.70233	0.12141	0.391521	0.4659	1	no
XLOC_000318	XLOC_000318	ALPL	chr1:21509371-21578412	Control_1_hr	Zn_1_hr	NOTEST	0.337195	0.272866	-0.305392	0	1	1	no
XLOC_000319	XLOC_000319	RP11-63N8.3	chr1:21586471-21591187	Control_1_hr	Zn_1_hr	NOTEST	0.0199367	0.0472771	1.24572	0	1	1	no
XLOC_000320	XLOC_000320	U7	chr1:21678297-21783606	Control_1_hr	Zn_1_hr	NOTEST	0	0	0	0	1	1	no
XLOC_000321	XLOC_000321	RP11-132G19.3	chr1:21678297-21783606	Control_1_hr	Zn_1_hr	NOTEST	0	0	0	0	1	1	no
XLOC_000322	XLOC_000322	LDLRAD2	chr1:21812264-21937297	Control_1_hr	Zn_1_hr	OK	0.472365	0.203434	-1.21534	-0.294041	0.4044	1	no
XLOC_000323	XLOC_000323	RP11-26H16.1	chr1:21812264-21937297	Control_1_hr	Zn_1_hr	NOTEST	0	0.0462321	inf	0	1	1	no
XLOC_000324	XLOC_000324	CELA3B	chr1:21977020-21998642	Control_1_hr	Zn_1_hr	NOTEST	0	0	0	0	1	1	no
XLOC_000325	XLOC_000325	Metazoa_SRP	chr1:21977020-21998642	Control_1_hr	Zn_1_hr	NOTEST	0	0.0717591	inf	0	1	1	no
XLOC_000326	XLOC_000326	RNU6-1022P	chr1:21977020-21998642	Control_1_hr	Zn_1_hr	NOTEST	0	0	0	0	1	1	no
XLOC_000327	XLOC_000327	CELA3A	chr1:22001655-22012539	Control_1_hr	Zn_1_hr	NOTEST	0	0.0113811	inf	0	1	1	no
XLOC_000328	XLOC_000328	Metazoa_SRP	chr1:22001655-22012539	Control_1_hr	Zn_1_hr	NOTEST	0	0.0717591	inf	0	1	1	no
XLOC_000329	XLOC_000329	RNU6-776P	chr1:22001655-22012539	Control_1_hr	Zn_1_hr	NOTEST	0	0	0	0	1	1	no
XLOC_000330	XLOC_000330	LINC00339	chr1:22025187-22031223	Control_1_hr	Zn_1_hr	OK	18.4537	15.8956	-0.215283	-1.09053	0.05545	1	no
XLOC_000331	XLOC_000331	CDC42	chr1:22052626-22092946	Control_1_hr	Zn_1_hr	OK	49.5276	46.3522	-0.0955949	-0.621947	0.2698	1	no
XLOC_000332	XLOC_000332	CDC42-IT1	chr1:22052626-22092946	Control_1_hr	Zn_1_hr	NOTEST	0	0	0	0	1	1	no
XLOC_000333	XLOC_000333	RP1-224A6.9	chr1:22100612-22101360	Control_1_hr	Zn_1_hr	NOTEST	0.101591	0.0589687	-0.784756	0	1	1	no
XLOC_000334	XLOC_000334	MIR4418	chr1:22266238-22266300	Control_1_hr	Zn_1_hr	NOTEST	0	0	0	0	1	1	no
XLOC_000335	XLOC_000335	ZBTB40	chr1:22451850-22531157	Control_1_hr	Zn_1_hr	OK	4.67666	5.00519	0.0979462	0.626533	0.27075	1	no
XLOC_000336	XLOC_000336	ZBTB40-IT1	chr1:22451850-22531157	Control_1_hr	Zn_1_hr	NOTEST	0	0	0	0	1	1	no
XLOC_000337	XLOC_000337	EPHA8	chr1:22563563-22603594	Control_1_hr	Zn_1_hr	NOTEST	0	0.0163663	inf	0	1	1	no
XLOC_000338	XLOC_000338	C1QA	chr1:22636505-22639608	Control_1_hr	Zn_1_hr	NOTEST	0.0320473	0	#NAME?	0	1	1	no
XLOC_000339	XLOC_000339	C1QC	chr1:22643629-22648110	Control_1_hr	Zn_1_hr	NOTEST	0.0207133	0	#NAME?	0	1	1	no
XLOC_000340	XLOC_000340	C1QB	chr1:22652761-22661538	Control_1_hr	Zn_1_hr	NOTEST	0	0	0	0	1	1	no
XLOC_000341	XLOC_000341	EPHB2	chr1:22710838-22921500	Control_1_hr	Zn_1_hr	OK	29.2858	30.0457	0.0369581	0.224828	0.69275	1	no
XLOC_000342	XLOC_000342	MIR4684	chr1:22710838-22921500	Control_1_hr	Zn_1_hr	NOTEST	0	0	0	0	1	1	no
XLOC_000343	XLOC_000343	KDM1A	chr1:23019447-23177808	Control_1_hr	Zn_1_hr	OK	41.6013	41.9981	0.0136975	0.055475	0.91835	1	no
XLOC_000344	XLOC_000344	MIR3115	chr1:23019447-23177808	Control_1_hr	Zn_1_hr	NOTEST	0	0	0	0	1	1	no
XLOC_000345	XLOC_000345	RP5-979D14.1	chr1:23019447-23177808	Control_1_hr	Zn_1_hr	NOTEST	0.0704327	0.0252884	-1.47777	0	1	1	no
XLOC_000346	XLOC_000346	RNU6-514P	chr1:23019447-23177808	Control_1_hr	Zn_1_hr	NOTEST	0	0	0	0	1	1	no
XLOC_000347	XLOC_000347	RNU6-135P	chr1:23019447-23177808	Control_1_hr	Zn_1_hr	NOTEST	0	0	0	0	1	1	no
XLOC_000348	XLOC_000348	RP5-1057J7.1	chr1:23244764-23245224	Control_1_hr	Zn_1_hr	NOTEST	0.0468192	0.083262	0.830557	0	1	1	no
XLOC_000349	XLOC_000349	ZNF436-AS1	chr1:23359447-23371839	Control_1_hr	Zn_1_hr	OK	1.19262	0.513653	-1.21527	-1.07195	0.01065	0.712238	no
XLOC_000350	XLOC_000350	RP4-654C18.1	chr1:23381060-23424740	Control_1_hr	Zn_1_hr	NOTEST	0	0	0	0	1	1	no
XLOC_000351	XLOC_000351	Metazoa_SRP	chr1:23538034-23538313	Control_1_hr	Zn_1_hr	NOTEST	0	0	0	0	1	1	no
XLOC_000352	XLOC_000352	MDS2	chr1:23581494-23640568	Control_1_hr	Zn_1_hr	NOTEST	0.152559	0.0313488	-2.28289	0	1	1	no
XLOC_000353	XLOC_000353	RP11-223J15.2	chr1:23670293-23680259	Control_1_hr	Zn_1_hr	NOTEST	0	0	0	0	1	1	no
XLOC_000354	XLOC_000354	RPL11	chr1:23691778-23696425	Control_1_hr	Zn_1_hr	OK	607.326	619.288	0.02814	0.189742	0.7376	1	no
XLOC_000355	XLOC_000355	TCEB3	chr1:23743154-23778287	Control_1_hr	Zn_1_hr	OK	16.0332	15.9977	-0.00319614	-0.0189053	0.97425	1	no
XLOC_000356	XLOC_000356	PITHD1	chr1:23778404-23788232	Control_1_hr	Zn_1_hr	OK	23.068	22.192	-0.055855	-0.339361	0.55405	1	no
XLOC_000357	XLOC_000357	LYPLA2	chr1:23790969-23795539	Control_1_hr	Zn_1_hr	OK	22.5626	21.8838	-0.0440724	-0.226631	0.6903	1	no
XLOC_000358	XLOC_000358	RP11-4M23.3	chr1:23870525-23913362	Control_1_hr	Zn_1_hr	NOTEST	0	0	0	0	1	1	no
XLOC_000359	XLOC_000359	MIR378F	chr1:23929069-23929147	Control_1_hr	Zn_1_hr	NOTEST	0	0	0	0	1	1	no
XLOC_000360	XLOC_000360	PNRC2	chr1:23959108-23963462	Control_1_hr	Zn_1_hr	OK	10.8672	11.3283	0.0599451	0.342084	0.53395	1	no
XLOC_000361	XLOC_000361	RP11-293P20.2	chr1:24040834-24112175	Control_1_hr	Zn_1_hr	NOTEST	0	0	0	0	1	1	no
XLOC_000362	XLOC_000362	RP11-293P20.4	chr1:24040834-24112175	Control_1_hr	Zn_1_hr	NOTEST	0	0	0	0	1	1	no
XLOC_000363	XLOC_000363	RP11-10N16.2	chr1:24200239-24211693	Control_1_hr	Zn_1_hr	NOTEST	0.0273194	0.00476932	-2.51807	0	1	1	no
XLOC_000364	XLOC_000364	AL590683.1	chr1:24227916-24228030	Control_1_hr	Zn_1_hr	NOTEST	0	0	0	0	1	1	no
XLOC_000365	XLOC_000365	GRHL3	chr1:24307555-24472976	Control_1_hr	Zn_1_hr	NOTEST	0.200963	0.248174	0.304426	0	1	1	no
XLOC_000366	XLOC_000366	NIPAL3	chr1:24307555-24472976	Control_1_hr	Zn_1_hr	OK	3.64445	4.24073	0.218613	0.813147	0.1469	1	no
XLOC_000367	XLOC_000367	RCAN3	chr1:24502350-24556024	Control_1_hr	Zn_1_hr	OK	6.89987	6.28297	-0.135123	-0.572628	0.2928	1	no
XLOC_000368	XLOC_000368	NCMAP	chr1:24556110-24609328	Control_1_hr	Zn_1_hr	NOTEST	0.303179	0.321126	0.0829691	0	1	1	no
XLOC_000369	XLOC_000369	RP11-496D1.2	chr1:24556110-24609328	Control_1_hr	Zn_1_hr	NOTEST	0	0	0	0	1	1	no
XLOC_000370	XLOC_000370	SRRM1	chr1:24631715-24673267	Control_1_hr	Zn_1_hr	OK	23.8023	20.947	-0.184355	-0.615347	0.2789	1	no
XLOC_000371	XLOC_000371	CLIC4	chr1:24745356-24844324	Control_1_hr	Zn_1_hr	OK	20.2908	19.8869	-0.0290072	-0.190393	0.73745	1	no
XLOC_000372	XLOC_000372	RP11-84D1.1	chr1:24899510-24965121	Control_1_hr	Zn_1_hr	NOTEST	0	0.014414	inf	0	1	1	no
XLOC_000373	XLOC_000373	MIR4425	chr1:25023502-25023586	Control_1_hr	Zn_1_hr	NOTEST	0	0	0	0	1	1	no
XLOC_000374	XLOC_000374	RP4-706G24.1	chr1:25208138-25208869	Control_1_hr	Zn_1_hr	NOTEST	0	0	0	0	1	1	no
XLOC_000375	XLOC_000375	RP3-465N24.6	chr1:25242236-25430192	Control_1_hr	Zn_1_hr	NOTEST	0.271788	0.165818	-0.712879	0	1	1	no
XLOC_000376	XLOC_000376	RHD	chr1:25242236-25430192	Control_1_hr	Zn_1_hr	NOTEST	0	0	0	0	1	1	no
XLOC_000377	XLOC_000377	TMEM50A	chr1:25242236-25430192	Control_1_hr	Zn_1_hr	OK	61.5393	63.7453	0.0508111	0.248723	0.66505	1	no
XLOC_000378	XLOC_000378	RP3-469D22.1	chr1:25242236-25430192	Control_1_hr	Zn_1_hr	OK	2.86378	3.05798	0.0946552	0.0470166	0.9355	1	no
XLOC_000379	XLOC_000379	TMEM57	chr1:25430857-25500209	Control_1_hr	Zn_1_hr	OK	5.21636	5.02934	-0.0526725	-0.20502	0.7138	1	no
XLOC_000380	XLOC_000380	LDLRAP1	chr1:25543579-25568886	Control_1_hr	Zn_1_hr	OK	9.21434	10.0626	0.127049	0.605187	0.24925	1	no
XLOC_000381	XLOC_000381	RP11-70P17.1	chr1:25581477-25590356	Control_1_hr	Zn_1_hr	NOTEST	0.0423786	0.0462296	0.12548	0	1	1	no
XLOC_000382	XLOC_000382	MAN1C1	chr1:25617467-25786207	Control_1_hr	Zn_1_hr	OK	0.548453	0.671295	0.291579	0.527505	0.26475	1	no
XLOC_000383	XLOC_000383	MTFR1L,RP1-317E23.6,SEPN1	chr1:25800175-25859458	Control_1_hr	Zn_1_hr	OK	51.277	52.8135	0.0425923	0.0213306	0.9264	1	no
XLOC_000384	XLOC_000384	RP1-125I3.2	chr1:25859612-25871253	Control_1_hr	Zn_1_hr	NOTEST	0	0.258105	inf	0	1	1	no
XLOC_000385	XLOC_000385	Y_RNA	chr1:25877495-25877605	Control_1_hr	Zn_1_hr	NOTEST	0	0	0	0	1	1	no
XLOC_000386	XLOC_000386	SNRPFP2	chr1:25884180-25906991	Control_1_hr	Zn_1_hr	NOTEST	0.318386	0	#NAME?	0	1	1	no
XLOC_000387	XLOC_000387	RP1-125I3.4	chr1:25884180-25906991	Control_1_hr	Zn_1_hr	NOTEST	0	0	0	0	1	1	no
XLOC_000388	XLOC_000388	AL033528.1	chr1:25911748-25911822	Control_1_hr	Zn_1_hr	NOTEST	0	0	0	0	1	1	no
XLOC_000389	XLOC_000389	RNU6-110P	chr1:25959766-25998157	Control_1_hr	Zn_1_hr	NOTEST	0	0	0	0	1	1	no
XLOC_000390	XLOC_000390	SCARNA17	chr1:26006005-26006130	Control_1_hr	Zn_1_hr	NOTEST	0	0	0	0	1	1	no
XLOC_000391	XLOC_000391	SCARNA18	chr1:26006215-26006299	Control_1_hr	Zn_1_hr	NOTEST	0	0	0	0	1	1	no
XLOC_000392	XLOC_000392	EXTL1	chr1:26019883-26036464	Control_1_hr	Zn_1_hr	NOTEST	0.0388298	0.0269522	-0.526762	0	1	1	no
XLOC_000393	XLOC_000393	AL391650.1	chr1:26071577-26071677	Control_1_hr	Zn_1_hr	NOTEST	0	0	0	0	1	1	no
XLOC_000394	XLOC_000394	PDIK1L	chr1:26111164-26125543	Control_1_hr	Zn_1_hr	OK	2.89685	2.31708	-0.322177	-1.42153	0.00995	0.677875	no
XLOC_000395	XLOC_000395	FAM110D	chr1:26159019-26162628	Control_1_hr	Zn_1_hr	NOTEST	0.0524097	0.0348701	-0.587846	0	1	1	no
XLOC_000396	XLOC_000396	ZNF593	chr1:26169870-26172060	Control_1_hr	Zn_1_hr	OK	11.4013	11.7149	0.0391405	0.22986	0.68795	1	no
XLOC_000397	XLOC_000397	CNKSR1	chr1:26177402-26189886	Control_1_hr	Zn_1_hr	OK	0.404723	0.5271	0.381142	0.277469	0.3266	1	no
XLOC_000398	XLOC_000398	CATSPER4	chr1:26190560-26202968	Control_1_hr	Zn_1_hr	NOTEST	0	0.00482018	inf	0	1	1	no
XLOC_000399	XLOC_000399	RP11-231P20.2	chr1:26209740-26229840	Control_1_hr	Zn_1_hr	NOTEST	0.0148576	0.0041237	-1.84919	0	1	1	no
XLOC_000400	XLOC_000400	CEP85	chr1:26234152-26279038	Control_1_hr	Zn_1_hr	OK	9.11025	9.53787	0.0661774	0.282596	0.60445	1	no
XLOC_000401	XLOC_000401	SH3BGRL3	chr1:26279175-26320523	Control_1_hr	Zn_1_hr	OK	64.3378	64.2289	-0.00244511	-0.0119585	0.98355	1	no
XLOC_000402	XLOC_000402	CD52	chr1:26279175-26320523	Control_1_hr	Zn_1_hr	NOTEST	0	0	0	0	1	1	no
XLOC_000403	XLOC_000403	RP11-569G9.7	chr1:26321858-26354130	Control_1_hr	Zn_1_hr	NOTEST	0.154176	0.0564518	-1.44949	0	1	1	no
XLOC_000404	XLOC_000404	LIN28A	chr1:26410777-26429722	Control_1_hr	Zn_1_hr	NOTEST	0.00388321	0.00477985	0.299717	0	1	1	no
XLOC_000405	XLOC_000405	DHDDS	chr1:26432281-26471294	Control_1_hr	Zn_1_hr	OK	15.7354	14.7934	-0.089064	-0.33776	0.53935	1	no
XLOC_000406	XLOC_000406	HMGN2	chr1:26472449-26475972	Control_1_hr	Zn_1_hr	OK	68.6186	64.2968	-0.0938527	-0.284592	0.6208	1	no
XLOC_000407	XLOC_000407	RPS6KA1	chr1:26529760-26575030	Control_1_hr	Zn_1_hr	NOTEST	0	0	0	0	1	1	no
XLOC_000408	XLOC_000408	MIR1976	chr1:26529760-26575030	Control_1_hr	Zn_1_hr	NOTEST	0	0	0	0	1	1	no
XLOC_000409	XLOC_000409	RP4-785J1.1	chr1:26647446-26647681	Control_1_hr	Zn_1_hr	NOTEST	0	0	0	0	1	1	no
XLOC_000410	XLOC_000410	ARID1A	chr1:26696032-26782104	Control_1_hr	Zn_1_hr	OK	16.7301	16.6447	-0.00738394	-0.0413529	0.9371	1	no
XLOC_000411	XLOC_000411	PIGV	chr1:26787471-26798398	Control_1_hr	Zn_1_hr	OK	7.04917	7.45416	0.0805926	0.38673	0.4857	1	no
XLOC_000412	XLOC_000412	RN7SL165P	chr1:26814821-26815112	Control_1_hr	Zn_1_hr	NOTEST	0	0	0	0	1	1	no
XLOC_000413	XLOC_000413	ZDHHC18	chr1:26826709-26857602	Control_1_hr	Zn_1_hr	OK	15.3641	17.7379	0.207271	0.888643	0.11775	1	no
XLOC_000414	XLOC_000414	SFN	chr1:26863137-26864457	Control_1_hr	Zn_1_hr	OK	174.563	176.946	0.0195577	0.131663	0.82	1	no
XLOC_000415	XLOC_000415	RP1-50O24.6	chr1:26876132-26890297	Control_1_hr	Zn_1_hr	NOTEST	0	0	0	0	1	1	no
XLOC_000416	XLOC_000416	NUDC	chr1:26890487-26946862	Control_1_hr	Zn_1_hr	OK	67.0063	67.9655	0.0205043	0.127717	0.825	1	no
XLOC_000417	XLOC_000417	RP11-344H11.4	chr1:26980164-26980975	Control_1_hr	Zn_1_hr	NOTEST	0.201032	0.0736187	-1.44928	0	1	1	no
XLOC_000418	XLOC_000418	RP11-344H11.5	chr1:26983627-26984024	Control_1_hr	Zn_1_hr	NOTEST	0	0	0	0	1	1	no
XLOC_000419	XLOC_000419	TRNP1	chr1:26993706-27000898	Control_1_hr	Zn_1_hr	OK	93.318	91.9677	-0.0210276	-0.12059	0.8325	1	no
XLOC_000420	XLOC_000420	RP11-40H20.5	chr1:27176750-27177277	Control_1_hr	Zn_1_hr	NOTEST	0	0.0268035	inf	0	1	1	no
XLOC_000421	XLOC_000421	NPM1P39	chr1:27206929-27207796	Control_1_hr	Zn_1_hr	OK	44.4977	41.035	-0.116876	-0.727943	0.20325	1	no
XLOC_000422	XLOC_000422	SNRPEP7	chr1:27211264-27211484	Control_1_hr	Zn_1_hr	NOTEST	0.45999	0.177869	-1.37078	0	1	1	no
XLOC_000423	XLOC_000423	WDTC1	chr1:27234515-27308633	Control_1_hr	Zn_1_hr	OK	6.88652	7.14783	0.0537296	0.318876	0.5703	1	no
XLOC_000424	XLOC_000424	RP11-4K3__A.3	chr1:27311239-27311838	Control_1_hr	Zn_1_hr	NOTEST	0	0.126617	inf	0	1	1	no
XLOC_000425	XLOC_000425	TMEM222	chr1:27322144-27336400	Control_1_hr	Zn_1_hr	OK	23.1963	22.2475	-0.0602532	-0.29545	0.6019	1	no
XLOC_000426	XLOC_000426	RNU6-48P	chr1:27322144-27336400	Control_1_hr	Zn_1_hr	NOTEST	0	0	0	0	1	1	no
XLOC_000427	XLOC_000427	RP11-4K3__A.5	chr1:27322144-27336400	Control_1_hr	Zn_1_hr	OK	64.0466	70.0953	0.130195	0.510222	0.3721	1	no
XLOC_000428	XLOC_000428	SYTL1	chr1:27342019-27353937	Control_1_hr	Zn_1_hr	OK	0.433359	0.304905	-0.507202	-0.441936	0.23445	1	no
XLOC_000429	XLOC_000429	RP1-144C9.2	chr1:27389467-27390145	Control_1_hr	Zn_1_hr	NOTEST	0	0	0	0	1	1	no
XLOC_000430	XLOC_000430	GPR3	chr1:27392643-27395814	Control_1_hr	Zn_1_hr	OK	1.40452	2.43461	0.793617	3.72691	5e-05	0.0116106	yes
XLOC_000431	XLOC_000431	RP4-752I6.1	chr1:27404225-27490158	Control_1_hr	Zn_1_hr	NOTEST	0	0	0	0	1	1	no
XLOC_000432	XLOC_000432	RP1-159A19.4	chr1:27525804-27530561	Control_1_hr	Zn_1_hr	NOTEST	0.116646	0.0884441	-0.399296	0	1	1	no
XLOC_000433	XLOC_000433	RP1-159A19.3	chr1:27649418-27649610	Control_1_hr	Zn_1_hr	OK	98.1432	95.2215	-0.0436003	-0.20337	0.72735	1	no
XLOC_000434	XLOC_000434	RP11-288L9.4	chr1:27666060-27703063	Control_1_hr	Zn_1_hr	NOTEST	0.0425393	0.114951	1.43415	0	1	1	no
XLOC_000435	XLOC_000435	RNU6-424P	chr1:27666060-27703063	Control_1_hr	Zn_1_hr	NOTEST	0	0	0	0	1	1	no
XLOC_000436	XLOC_000436	FAM76A	chr1:27725978-27763122	Control_1_hr	Zn_1_hr	OK	3.5562	3.96045	0.155325	0.485096	0.3869	1	no
XLOC_000437	XLOC_000437	RP3-426I6.2	chr1:27725978-27763122	Control_1_hr	Zn_1_hr	OK	9.84527	9.13076	-0.108696	-0.226592	0.68085	1	no
XLOC_000438	XLOC_000438	RPEP3	chr1:27725978-27763122	Control_1_hr	Zn_1_hr	NOTEST	0.101822	0.0373153	-1.44821	0	1	1	no
XLOC_000439	XLOC_000439	STX12	chr1:27773182-27824452	Control_1_hr	Zn_1_hr	OK	6.55522	7.85579	0.261112	1.06872	0.06135	1	no
XLOC_000440	XLOC_000440	RP3-426I6.5	chr1:27773182-27824452	Control_1_hr	Zn_1_hr	NOTEST	0	0	0	0	1	1	no
XLOC_000441	XLOC_000441	AL020997.1	chr1:27773182-27824452	Control_1_hr	Zn_1_hr	NOTEST	0	0	0	0	1	1	no
XLOC_000442	XLOC_000442	RP3-426I6.6	chr1:27773182-27824452	Control_1_hr	Zn_1_hr	NOTEST	0.071747	0.0767777	0.0977677	0	1	1	no
XLOC_000443	XLOC_000443	RNU6-1245P	chr1:27824537-27824643	Control_1_hr	Zn_1_hr	NOTEST	0	0	0	0	1	1	no
XLOC_000444	XLOC_000444	PPP1R8	chr1:27830777-27851676	Control_1_hr	Zn_1_hr	OK	19.2338	20.4226	0.0865252	0.472688	0.4106	1	no
XLOC_000445	XLOC_000445	SCARNA1	chr1:27830777-27851676	Control_1_hr	Zn_1_hr	NOTEST	0	0	0	0	1	1	no
XLOC_000446	XLOC_000446	THEMIS2	chr1:27872542-27886685	Control_1_hr	Zn_1_hr	OK	0.582717	0.381053	-0.612805	-0.431343	0.21975	1	no
XLOC_000447	XLOC_000447	SMPDL3B	chr1:27934992-27968096	Control_1_hr	Zn_1_hr	OK	2.32033	2.35389	0.0207149	0.0696498	0.8985	1	no
XLOC_000448	XLOC_000448	XKR8	chr1:27934992-27968096	Control_1_hr	Zn_1_hr	OK	2.83974	2.64882	-0.100405	-0.350712	0.4924	1	no
XLOC_000449	XLOC_000449	AL137792.1	chr1:28091275-28091381	Control_1_hr	Zn_1_hr	NOTEST	0	0	0	0	1	1	no
XLOC_000450	XLOC_000450	RP5-1053E7.2	chr1:28109738-28110298	Control_1_hr	Zn_1_hr	NOTEST	0	0	0	0	1	1	no
XLOC_000451	XLOC_000451	ATPIF1	chr1:28236108-28246906	Control_1_hr	Zn_1_hr	OK	126.675	121.866	-0.055838	-0.328065	0.5645	1	no
XLOC_000452	XLOC_000452	RP5-1092A3.5	chr1:28247143-28247568	Control_1_hr	Zn_1_hr	NOTEST	0.0524658	0	#NAME?	0	1	1	no
XLOC_000453	XLOC_000453	SESN2	chr1:28259526-28282491	Control_1_hr	Zn_1_hr	OK	2.52902	2.38626	-0.0838252	-0.578245	0.30285	1	no
XLOC_000454	XLOC_000454	MED18	chr1:28329001-28335967	Control_1_hr	Zn_1_hr	OK	10.2009	11.5865	0.183754	0.816796	0.142	1	no
XLOC_000455	XLOC_000455	PHACTR4	chr1:28369602-28500369	Control_1_hr	Zn_1_hr	OK	7.85959	7.75261	-0.0197721	-0.117519	0.83165	1	no
XLOC_000456	XLOC_000456	RP1-308E4.1	chr1:28369602-28500369	Control_1_hr	Zn_1_hr	OK	3.04686	2.87494	-0.0837941	-0.0589383	0.91825	1	no
XLOC_000457	XLOC_000457	RNU6ATAC27P	chr1:28369602-28500369	Control_1_hr	Zn_1_hr	NOTEST	0	0	0	0	1	1	no
XLOC_000458	XLOC_000458	RCC1,SNHG3,SNORA73A	chr1:28505942-28539300	Control_1_hr	Zn_1_hr	OK	85.4231	88.0695	0.0440174	0.148461	0.68785	1	no
XLOC_000459	XLOC_000459	SNORA73B	chr1:28505942-28539300	Control_1_hr	Zn_1_hr	OK	5.18176	5.66863	0.129556	0.0305735	0.9407	1	no
XLOC_000460	XLOC_000460	RP4-669K10.8	chr1:28544459-28546542	Control_1_hr	Zn_1_hr	OK	1.28648	1.34667	0.0659648	0.262413	0.65255	1	no
XLOC_000461	XLOC_000461	TRNAU1AP	chr1:28553084-28582983	Control_1_hr	Zn_1_hr	OK	13.5942	12.3748	-0.135591	-0.389698	0.49175	1	no
XLOC_000462	XLOC_000462	RAB42	chr1:28589322-28643085	Control_1_hr	Zn_1_hr	OK	0.48802	0.58189	0.253805	0.377012	0.47965	1	no
XLOC_000463	XLOC_000463	RP11-442N24__B.1	chr1:28643227-28648581	Control_1_hr	Zn_1_hr	OK	0.514873	0.612103	0.249558	0.28174	0.5995	1	no
XLOC_000464	XLOC_000464	RNU11	chr1:28648599-28648733	Control_1_hr	Zn_1_hr	NOTEST	2.14084	2.21523	0.049278	0	1	1	no
XLOC_000465	XLOC_000465	GMEB1	chr1:28668731-28719353	Control_1_hr	Zn_1_hr	OK	4.02843	4.18081	0.053567	0.257727	0.65575	1	no
XLOC_000466	XLOC_000466	SCARNA24	chr1:28668731-28719353	Control_1_hr	Zn_1_hr	NOTEST	0	2.32262	inf	0	1	1	no
XLOC_000467	XLOC_000467	YTHDF2	chr1:28736620-28769775	Control_1_hr	Zn_1_hr	OK	31.631	31.2266	-0.0185651	-0.105234	0.8529	1	no
XLOC_000468	XLOC_000468	OPRD1	chr1:28812141-28877336	Control_1_hr	Zn_1_hr	NOTEST	0.00865288	0.0111953	0.371647	0	1	1	no
XLOC_000469	XLOC_000469	EPB41	chr1:28887090-29123935	Control_1_hr	Zn_1_hr	OK	4.38838	5.03972	0.199654	0.395576	0.40245	1	no
XLOC_000470	XLOC_000470	Y_RNA	chr1:28887090-29123935	Control_1_hr	Zn_1_hr	NOTEST	0	0	0	0	1	1	no
XLOC_000471	XLOC_000471	Metazoa_SRP	chr1:28887090-29123935	Control_1_hr	Zn_1_hr	NOTEST	0	0	0	0	1	1	no
XLOC_000472	XLOC_000472	RP11-467D18.2	chr1:29192872-29230942	Control_1_hr	Zn_1_hr	NOTEST	0.047999	0.0566268	0.238482	0	1	1	no
XLOC_000473	XLOC_000473	PTPRU	chr1:29236515-29326813	Control_1_hr	Zn_1_hr	OK	5.80445	5.97027	0.0406367	0.157075	0.772	1	no
XLOC_000474	XLOC_000474	AL139151.1	chr1:29432480-29432562	Control_1_hr	Zn_1_hr	NOTEST	0	0	0	0	1	1	no
XLOC_000475	XLOC_000475	AL645944.1	chr1:29884901-29885005	Control_1_hr	Zn_1_hr	NOTEST	0	0	0	0	1	1	no
XLOC_000476	XLOC_000476	RP5-893G23.1	chr1:30140262-30141607	Control_1_hr	Zn_1_hr	NOTEST	0	0	0	0	1	1	no
XLOC_000477	XLOC_000477	RP3-357I16.1	chr1:30226522-30226615	Control_1_hr	Zn_1_hr	NOTEST	0	0	0	0	1	1	no
XLOC_000478	XLOC_000478	RP4-591L5.2	chr1:30415824-30421108	Control_1_hr	Zn_1_hr	NOTEST	0	0	0	0	1	1	no
XLOC_000479	XLOC_000479	MATN1-AS1	chr1:30711276-30726827	Control_1_hr	Zn_1_hr	OK	0.707249	0.912328	0.367334	0.515989	0.2863	1	no
XLOC_000480	XLOC_000480	RP1-65J11.1	chr1:30824227-30834284	Control_1_hr	Zn_1_hr	NOTEST	0.0989354	0.110594	0.160719	0	1	1	no
XLOC_000481	XLOC_000481	RN7SKP91	chr1:30843822-30844110	Control_1_hr	Zn_1_hr	NOTEST	0	0	0	0	1	1	no
XLOC_000482	XLOC_000482	RP1-65J11.5	chr1:30858157-30860254	Control_1_hr	Zn_1_hr	NOTEST	0	0	0	0	1	1	no
XLOC_000483	XLOC_000483	RP11-201O14.1	chr1:30931505-31065991	Control_1_hr	Zn_1_hr	NOTEST	0	0	0	0	1	1	no
XLOC_000484	XLOC_000484	RP11-201O14.2	chr1:30931505-31065991	Control_1_hr	Zn_1_hr	NOTEST	0	0	0	0	1	1	no
XLOC_000485	XLOC_000485	ZCCHC17	chr1:31296981-31364953	Control_1_hr	Zn_1_hr	OK	17.9623	17.694	-0.0217094	-0.122755	0.82705	1	no
XLOC_000486	XLOC_000486	SERINC2	chr1:31409564-31434680	Control_1_hr	Zn_1_hr	OK	24.4355	26.2674	0.104297	0.669239	0.2452	1	no
XLOC_000487	XLOC_000487	LINC01225	chr1:31500084-31540885	Control_1_hr	Zn_1_hr	NOTEST	0	0.015197	inf	0	1	1	no
XLOC_000488	XLOC_000488	LINC01226	chr1:31500084-31540885	Control_1_hr	Zn_1_hr	NOTEST	0	0.0069588	inf	0	1	1	no
XLOC_000489	XLOC_000489	RP11-439L8.5	chr1:31500084-31540885	Control_1_hr	Zn_1_hr	NOTEST	0	0	0	0	1	1	no
XLOC_000490	XLOC_000490	TINAGL1	chr1:31576484-31587686	Control_1_hr	Zn_1_hr	NOTEST	0.339812	0.307627	-0.143554	0	1	1	no
XLOC_000491	XLOC_000491	HCRTR1	chr1:31617685-31704319	Control_1_hr	Zn_1_hr	NOTEST	0.0193567	0.0519774	1.42505	0	1	1	no
XLOC_000492	XLOC_000492	RP11-73M7.6,RP11-73M7.9	chr1:31617685-31704319	Control_1_hr	Zn_1_hr	NOTEST	0.245872	0.0605168	-2.0225	0	1	1	no
XLOC_000493	XLOC_000493	RP11-84A19.3	chr1:31789129-31816051	Control_1_hr	Zn_1_hr	NOTEST	0	0	0	0	1	1	no
XLOC_000494	XLOC_000494	RP4-534N18.2	chr1:31842018-31944856	Control_1_hr	Zn_1_hr	NOTEST	0	0	0	0	1	1	no
XLOC_000495	XLOC_000495	KHDRBS1	chr1:32013828-32102866	Control_1_hr	Zn_1_hr	OK	85.4781	83.7132	-0.0300995	-0.193077	0.7343	1	no
XLOC_000496	XLOC_000496	TMEM39B	chr1:32013828-32102866	Control_1_hr	Zn_1_hr	OK	8.46255	8.29167	-0.0294284	-0.0434737	0.93795	1	no
XLOC_000497	XLOC_000497	MIR5585	chr1:32013828-32102866	Control_1_hr	Zn_1_hr	NOTEST	0	0	0	0	1	1	no
XLOC_000498	XLOC_000498	KPNA6,RP4-622L5.2	chr1:32108037-32176568	Control_1_hr	Zn_1_hr	OK	12.0955	12.065	-0.0036489	-0.0170088	0.97465	1	no
XLOC_000499	XLOC_000499	TXLNA	chr1:32179685-32198285	Control_1_hr	Zn_1_hr	OK	19.7224	18.6354	-0.0817846	-0.539215	0.34675	1	no
XLOC_000500	XLOC_000500	CCDC28B	chr1:32200385-32208687	Control_1_hr	Zn_1_hr	OK	2.68924	2.92309	0.120299	0.317513	0.574	1	no
XLOC_000501	XLOC_000501	IQCC	chr1:32200385-32208687	Control_1_hr	Zn_1_hr	OK	1.85495	1.65729	-0.162559	-0.640487	0.25865	1	no
XLOC_000502	XLOC_000502	DCDC2B	chr1:32209093-32231604	Control_1_hr	Zn_1_hr	NOTEST	0.117887	0.0733605	-0.684325	0	1	1	no
XLOC_000503	XLOC_000503	EIF3I	chr1:32209093-32231604	Control_1_hr	Zn_1_hr	OK	151.379	152.482	0.0104747	0.0625415	0.91195	1	no
XLOC_000504	XLOC_000504	FAM167B	chr1:32247232-32248856	Control_1_hr	Zn_1_hr	OK	0.715458	0.676519	-0.080737	-0.148661	0.79525	1	no
XLOC_000505	XLOC_000505	LCK	chr1:32251238-32286165	Control_1_hr	Zn_1_hr	NOTEST	0.0234252	0.022773	-0.0407375	0	1	1	no
XLOC_000506	XLOC_000506	HDAC1	chr1:32292085-32333635	Control_1_hr	Zn_1_hr	OK	62.9596	67.752	0.105837	0.539636	0.34025	1	no
XLOC_000507	XLOC_000507	TSSK3	chr1:32351520-32364312	Control_1_hr	Zn_1_hr	OK	0.747584	0.570405	-0.390249	-0.263837	0.4674	1	no
XLOC_000508	XLOC_000508	RP11-395N6.4	chr1:32421978-32422319	Control_1_hr	Zn_1_hr	NOTEST	0	0	0	0	1	1	no
XLOC_000509	XLOC_000509	RN7SL122P	chr1:32457834-32458135	Control_1_hr	Zn_1_hr	NOTEST	0.104056	0	#NAME?	0	1	1	no
XLOC_000510	XLOC_000510	RP1-27O5.3,ZBTB8A,ZBTB8B	chr1:32465056-32650903	Control_1_hr	Zn_1_hr	OK	1.90972	1.73104	-0.14172	-0.376185	0.514	1	no
XLOC_000511	XLOC_000511	Y_RNA	chr1:32465056-32650903	Control_1_hr	Zn_1_hr	NOTEST	0	0	0	0	1	1	no
XLOC_000512	XLOC_000512	RBBP4	chr1:32651141-32703596	Control_1_hr	Zn_1_hr	OK	34.5667	38.2822	0.147292	0.541839	0.33995	1	no
XLOC_000513	XLOC_000513	KIAA1522	chr1:32741884-32774970	Control_1_hr	Zn_1_hr	OK	22.7816	22.4525	-0.0209925	-0.131226	0.8112	1	no
XLOC_000514	XLOC_000514	S100PBP	chr1:32775236-32858879	Control_1_hr	Zn_1_hr	OK	9.20935	8.94631	-0.0418077	-0.0478503	0.91975	1	no
XLOC_000515	XLOC_000515	HPCA	chr1:32885993-32901438	Control_1_hr	Zn_1_hr	OK	0.39463	0.599359	0.602919	0.273472	0.5941	1	no
XLOC_000516	XLOC_000516	FKSG48	chr1:32973666-32974041	Control_1_hr	Zn_1_hr	NOTEST	0	0.0707527	inf	0	1	1	no
XLOC_000517	XLOC_000517	RP4-803A2.1	chr1:32979946-32980472	Control_1_hr	Zn_1_hr	NOTEST	0	0.0806467	inf	0	1	1	no
XLOC_000518	XLOC_000518	RP1-117O3.2,RP4-803A2.2	chr1:32986951-33080996	Control_1_hr	Zn_1_hr	NOTEST	0.159617	0.122288	-0.384332	0	1	1	no
XLOC_000519	XLOC_000519	AZIN2	chr1:33081103-33120530	Control_1_hr	Zn_1_hr	OK	0.763421	0.459202	-0.733349	-0.477374	0.0663	1	no
XLOC_000520	XLOC_000520	RP11-131M11.3	chr1:33145401-33182059	Control_1_hr	Zn_1_hr	NOTEST	0.10067	0.0609912	-0.722958	0	1	1	no
XLOC_000521	XLOC_000521	ZNF362	chr1:33256544-33300719	Control_1_hr	Zn_1_hr	OK	6.46359	7.58273	0.230381	0.796453	0.1102	1	no
XLOC_000522	XLOC_000522	RP11-415J8.7	chr1:33256544-33300719	Control_1_hr	Zn_1_hr	NOTEST	0.330156	0.109296	-1.59491	0	1	1	no
XLOC_000523	XLOC_000523	RP11-415J8.3	chr1:33306765-33431052	Control_1_hr	Zn_1_hr	OK	0.846696	1.63442	0.948863	0.63374	0.13905	1	no
XLOC_000524	XLOC_000524	RP11-415J8.5	chr1:33306765-33431052	Control_1_hr	Zn_1_hr	NOTEST	0	0	0	0	1	1	no
XLOC_000525	XLOC_000525	TLR12P	chr1:33466248-33468954	Control_1_hr	Zn_1_hr	NOTEST	0.0106157	0.00676755	-0.649489	0	1	1	no
XLOC_000526	XLOC_000526	ZSCAN20	chr1:33472644-33496507	Control_1_hr	Zn_1_hr	OK	0.818552	0.794312	-0.043368	-0.134788	0.7899	1	no
XLOC_000527	XLOC_000527	HSPD1P14	chr1:33513998-34165842	Control_1_hr	Zn_1_hr	NOTEST	0	0	0	0	1	1	no
XLOC_000528	XLOC_000528	HMGB4	chr1:33513998-34165842	Control_1_hr	Zn_1_hr	NOTEST	0	0	0	0	1	1	no
XLOC_000529	XLOC_000529	CSMD2-AS1	chr1:33513998-34165842	Control_1_hr	Zn_1_hr	NOTEST	0	0	0	0	1	1	no
XLOC_000530	XLOC_000530	RNA5SP42	chr1:33513998-34165842	Control_1_hr	Zn_1_hr	NOTEST	0	0	0	0	1	1	no
XLOC_000531	XLOC_000531	C1orf94	chr1:34166882-34219131	Control_1_hr	Zn_1_hr	NOTEST	0	0	0	0	1	1	no
XLOC_000532	XLOC_000532	GJB5	chr1:34712736-34859816	Control_1_hr	Zn_1_hr	NOTEST	0.126643	0.0723947	-0.806807	0	1	1	no
XLOC_000533	XLOC_000533	GJB4	chr1:34712736-34859816	Control_1_hr	Zn_1_hr	NOTEST	0.0405128	0.0729849	0.84922	0	1	1	no
XLOC_000534	XLOC_000534	GJB3	chr1:34712736-34859816	Control_1_hr	Zn_1_hr	OK	0.850285	0.759597	-0.162712	-0.198491	0.7263	1	no
XLOC_000535	XLOC_000535	GJA4	chr1:34712736-34859816	Control_1_hr	Zn_1_hr	NOTEST	0	0	0	0	1	1	no
XLOC_000536	XLOC_000536	RP5-997D16.2	chr1:34712736-34859816	Control_1_hr	Zn_1_hr	OK	0.53341	0.471321	-0.178537	-0.0862882	0.8917	1	no
XLOC_000537	XLOC_000537	RP11-248I9.2	chr1:35053467-35059271	Control_1_hr	Zn_1_hr	NOTEST	0	0	0	0	1	1	no
XLOC_000538	XLOC_000538	ZMYM1	chr1:35059785-35115859	Control_1_hr	Zn_1_hr	OK	4.23242	4.98608	0.236424	0.960704	0.07985	1	no
XLOC_000539	XLOC_000539	EFCAB14P1	chr1:35122021-35122484	Control_1_hr	Zn_1_hr	OK	8.49025	9.7452	0.198884	0.804722	0.17055	1	no
XLOC_000540	XLOC_000540	Y_RNA	chr1:35195968-35196062	Control_1_hr	Zn_1_hr	NOTEST	0	0	0	0	1	1	no
XLOC_000541	XLOC_000541	ZMYM4	chr1:35268966-35422058	Control_1_hr	Zn_1_hr	OK	11.8765	13.1562	0.147626	0.326384	0.5521	1	no
XLOC_000542	XLOC_000542	SNORA62	chr1:35268966-35422058	Control_1_hr	Zn_1_hr	NOTEST	0	0	0	0	1	1	no
XLOC_000543	XLOC_000543	RPL5P4	chr1:35268966-35422058	Control_1_hr	Zn_1_hr	OK	17.0913	16.475	-0.0529864	-0.141342	0.80585	1	no
XLOC_000544	XLOC_000544	Metazoa_SRP	chr1:35268966-35422058	Control_1_hr	Zn_1_hr	NOTEST	0	0	0	0	1	1	no
XLOC_000545	XLOC_000545	RP4-728D4.3	chr1:35433489-35567274	Control_1_hr	Zn_1_hr	NOTEST	0	0	0	0	1	1	no
XLOC_000546	XLOC_000546	NCDN	chr1:35433489-35567274	Control_1_hr	Zn_1_hr	OK	12.9963	13.4561	0.0501569	0.167046	0.7733	1	no
XLOC_000547	XLOC_000547	TFAP2E	chr1:35569812-35595328	Control_1_hr	Zn_1_hr	NOTEST	0.265803	0.268855	0.0164677	0	1	1	no
XLOC_000548	XLOC_000548	RP11-435D7.3	chr1:35720217-35769967	Control_1_hr	Zn_1_hr	NOTEST	0.289091	0.344151	0.251515	0	1	1	no
XLOC_000549	XLOC_000549	AGO4	chr1:35808171-35857890	Control_1_hr	Zn_1_hr	OK	1.92181	2.0782	0.112867	0.16508	0.76655	1	no
XLOC_000550	XLOC_000550	AGO1,RP4-789D17.3	chr1:35869807-35929610	Control_1_hr	Zn_1_hr	OK	4.13818	4.24682	0.037384	0.191504	0.739	1	no
XLOC_000551	XLOC_000551	AGO3	chr1:35930717-36072500	Control_1_hr	Zn_1_hr	OK	4.91535	4.06086	-0.275508	-0.756453	0.1873	1	no
XLOC_000552	XLOC_000552	TEKT2	chr1:36084074-36088275	Control_1_hr	Zn_1_hr	NOTEST	0.0141618	0.031768	1.16557	0	1	1	no
XLOC_000553	XLOC_000553	ADPRHL2	chr1:36088874-36093932	Control_1_hr	Zn_1_hr	OK	18.2873	18.4323	0.0113961	0.0706807	0.9034	1	no
XLOC_000554	XLOC_000554	MAP7D1	chr1:36136569-36180849	Control_1_hr	Zn_1_hr	OK	75.5947	76.0978	0.00957137	0.0431451	0.93745	1	no
XLOC_000555	XLOC_000555	RN7SL131P	chr1:36191914-36192170	Control_1_hr	Zn_1_hr	NOTEST	0	0	0	0	1	1	no
XLOC_000556	XLOC_000556	THRAP3	chr1:36224415-36305357	Control_1_hr	Zn_1_hr	OK	34.4869	33.0354	-0.0620376	-0.31337	0.52495	1	no
XLOC_000557	XLOC_000557	AL360074.1	chr1:36224415-36305357	Control_1_hr	Zn_1_hr	NOTEST	0	0	0	0	1	1	no
XLOC_000558	XLOC_000558	RP11-268J15.5,SH3D21	chr1:36306386-36329221	Control_1_hr	Zn_1_hr	OK	1.59018	1.58555	-0.00420761	-0.00932533	0.98465	1	no
XLOC_000559	XLOC_000559	FTLP18	chr1:36630334-36630885	Control_1_hr	Zn_1_hr	NOTEST	0	0	0	0	1	1	no
XLOC_000560	XLOC_000560	RP4-614N24.1	chr1:36773139-36775768	Control_1_hr	Zn_1_hr	NOTEST	0	0	0	0	1	1	no
XLOC_000561	XLOC_000561	MIR4255	chr1:37161562-37161634	Control_1_hr	Zn_1_hr	NOTEST	0	0	0	0	1	1	no
XLOC_000562	XLOC_000562	RNU6-636P	chr1:37203609-37203716	Control_1_hr	Zn_1_hr	NOTEST	0	0	0	0	1	1	no
XLOC_000563	XLOC_000563	RPS29P6	chr1:37330851-37330996	Control_1_hr	Zn_1_hr	NOTEST	0	0	0	0	1	1	no
XLOC_000564	XLOC_000564	MIR6732,ZC3H12A	chr1:37474551-37484379	Control_1_hr	Zn_1_hr	OK	5.98998	8.50102	0.505085	1.47736	0.0047	0.435331	no
XLOC_000565	XLOC_000565	FTH1P1	chr1:37534448-37554302	Control_1_hr	Zn_1_hr	NOTEST	0.200402	0.152317	-0.395817	0	1	1	no
XLOC_000566	XLOC_000566	RP3-423B22.5	chr1:37556246-37556499	Control_1_hr	Zn_1_hr	OK	0.854187	0.609542	-0.486826	-0.24258	0.68695	1	no
XLOC_000567	XLOC_000567	DNALI1	chr1:37556918-37595935	Control_1_hr	Zn_1_hr	NOTEST	0.0472531	0.0227229	-1.05626	0	1	1	no
XLOC_000568	XLOC_000568	CDCA8	chr1:37692417-37709719	Control_1_hr	Zn_1_hr	OK	24.1835	24.9394	0.0444031	0.287067	0.62	1	no
XLOC_000569	XLOC_000569	ACTN4P2	chr1:37776669-37779418	Control_1_hr	Zn_1_hr	NOTEST	0	0	0	0	1	1	no
XLOC_000570	XLOC_000570	MANEAL	chr1:37793801-37801137	Control_1_hr	Zn_1_hr	OK	24.2429	25.8493	0.092565	0.508819	0.3746	1	no
XLOC_000571	XLOC_000571	C1orf122	chr1:37802943-37809454	Control_1_hr	Zn_1_hr	OK	34.0704	35.1662	0.0456737	0.205095	0.7191	1	no
XLOC_000572	XLOC_000572	RP11-109P14.8	chr1:37809566-37859620	Control_1_hr	Zn_1_hr	NOTEST	0	0	0	0	1	1	no
XLOC_000573	XLOC_000573	RP11-109P14.10	chr1:37860696-37947057	Control_1_hr	Zn_1_hr	NOTEST	0.143226	0.213778	0.577821	0	1	1	no
XLOC_000574	XLOC_000574	SNORA63	chr1:37860696-37947057	Control_1_hr	Zn_1_hr	NOTEST	0	0	0	0	1	1	no
XLOC_000575	XLOC_000575	RNU6-584P	chr1:37860696-37947057	Control_1_hr	Zn_1_hr	NOTEST	0	0	0	0	1	1	no
XLOC_000576	XLOC_000576	Metazoa_SRP	chr1:37953507-37953780	Control_1_hr	Zn_1_hr	NOTEST	0	0.0967015	inf	0	1	1	no
XLOC_000577	XLOC_000577	RNU6-510P	chr1:37991461-37991569	Control_1_hr	Zn_1_hr	NOTEST	0	0	0	0	1	1	no
XLOC_000578	XLOC_000578	UTP11L	chr1:38009257-38024824	Control_1_hr	Zn_1_hr	OK	34.0329	33.4043	-0.0268962	-0.123998	0.83235	1	no
XLOC_000579	XLOC_000579	RP5-884C9.2	chr1:38047313-38119025	Control_1_hr	Zn_1_hr	NOTEST	0	0	0	0	1	1	no
XLOC_000580	XLOC_000580	MIR3659	chr1:38047313-38119025	Control_1_hr	Zn_1_hr	NOTEST	0	0	0	0	1	1	no
XLOC_000581	XLOC_000581	RNU6-753P	chr1:38396658-38396765	Control_1_hr	Zn_1_hr	NOTEST	0	0	0	0	1	1	no
XLOC_000582	XLOC_000582	RP11-329N22.1	chr1:38475195-38476484	Control_1_hr	Zn_1_hr	NOTEST	0	0	0	0	1	1	no
XLOC_000583	XLOC_000583	RP11-334L9.1	chr1:38708930-38710890	Control_1_hr	Zn_1_hr	OK	1.93273	1.87188	-0.0461473	-0.215145	0.7107	1	no
XLOC_000584	XLOC_000584	RP5-864K19.4	chr1:38838197-38941799	Control_1_hr	Zn_1_hr	OK	0.902889	0.892986	-0.01591	-0.00718564	0.98885	1	no
XLOC_000585	XLOC_000585	RNU6-605P	chr1:38838197-38941799	Control_1_hr	Zn_1_hr	NOTEST	0	0	0	0	1	1	no
XLOC_000586	XLOC_000586	AKIRIN1	chr1:38991222-39006059	Control_1_hr	Zn_1_hr	OK	23.2116	24.9145	0.102142	0.600133	0.29955	1	no
XLOC_000587	XLOC_000587	NDUFS5	chr1:39026317-39034636	Control_1_hr	Zn_1_hr	OK	211.955	215.1	0.0212462	0.139979	0.80835	1	no
XLOC_000588	XLOC_000588	MACF1	chr1:39081315-39487177	Control_1_hr	Zn_1_hr	OK	35.6559	34.8989	-0.0309596	-0.112364	0.82865	1	no
XLOC_000589	XLOC_000589	RP11-416A14.1	chr1:39081315-39487177	Control_1_hr	Zn_1_hr	NOTEST	0	0.052584	inf	0	1	1	no
XLOC_000590	XLOC_000590	BMP8A	chr1:39491645-39558707	Control_1_hr	Zn_1_hr	NOTEST	0.115867	0.112233	-0.0459694	0	1	1	no
XLOC_000591	XLOC_000591	OXCT2P1	chr1:39491645-39558707	Control_1_hr	Zn_1_hr	NOTEST	0	0.0058856	inf	0	1	1	no
XLOC_000592	XLOC_000592	RP11-69E11.8	chr1:39560815-39576790	Control_1_hr	Zn_1_hr	NOTEST	0.0362603	0.022982	-0.657891	0	1	1	no
XLOC_000593	XLOC_000593	RP1-144F13.3	chr1:39624152-39639945	Control_1_hr	Zn_1_hr	NOTEST	0	0	0	0	1	1	no
XLOC_000594	XLOC_000594	PPIE	chr1:39692181-39788861	Control_1_hr	Zn_1_hr	OK	26.4048	26.5816	0.00962693	0.0470842	0.93645	1	no
XLOC_000595	XLOC_000595	RP1-144F13.4	chr1:39692181-39788861	Control_1_hr	Zn_1_hr	OK	0.796209	0.678021	-0.231818	-0.102819	0.89055	1	no
XLOC_000596	XLOC_000596	RP1-118J21.25	chr1:39788975-39790171	Control_1_hr	Zn_1_hr	NOTEST	0.281499	0.123412	-1.18964	0	1	1	no
XLOC_000597	XLOC_000597	RP1-118J21.5	chr1:39895425-39902256	Control_1_hr	Zn_1_hr	NOTEST	0.0267358	0.0635391	1.24887	0	1	1	no
XLOC_000598	XLOC_000598	MFSD2A	chr1:39955111-39969968	Control_1_hr	Zn_1_hr	OK	2.87051	2.9118	0.020605	0.0825403	0.87355	1	no
XLOC_000599	XLOC_000599	RP3-342P20.2	chr1:39955111-39969968	Control_1_hr	Zn_1_hr	OK	0.858162	0.74366	-0.206606	-0.287111	0.6137	1	no
XLOC_000600	XLOC_000600	CAP1	chr1:40040232-40072649	Control_1_hr	Zn_1_hr	OK	115.461	119.414	0.0485712	0.254436	0.65245	1	no
XLOC_000601	XLOC_000601	RP11-115D7.3	chr1:40132763-40133448	Control_1_hr	Zn_1_hr	OK	1.74502	1.45717	-0.260076	-0.588777	0.30825	1	no
XLOC_000602	XLOC_000602	RLF	chr1:40161372-40240921	Control_1_hr	Zn_1_hr	OK	3.21698	3.13773	-0.0359877	-0.216245	0.7012	1	no
XLOC_000603	XLOC_000603	RNU6-1237P	chr1:40161372-40240921	Control_1_hr	Zn_1_hr	NOTEST	0	0	0	0	1	1	no
XLOC_000604	XLOC_000604	TMCO2	chr1:40245946-40251691	Control_1_hr	Zn_1_hr	NOTEST	0	0	0	0	1	1	no
XLOC_000605	XLOC_000605	ZMPSTE24	chr1:40258106-40294184	Control_1_hr	Zn_1_hr	OK	32.7391	33.657	0.0398919	0.260249	0.6493	1	no
XLOC_000606	XLOC_000606	SMAP2	chr1:40344849-40423326	Control_1_hr	Zn_1_hr	OK	5.62482	5.61835	-0.00166126	-0.00904615	0.98635	1	no
XLOC_000607	XLOC_000607	RP1-228H13.2	chr1:40344849-40423326	Control_1_hr	Zn_1_hr	NOTEST	0	0	0	0	1	1	no
XLOC_000608	XLOC_000608	ZFP69B	chr1:40450101-40463718	Control_1_hr	Zn_1_hr	OK	1.10574	1.16098	0.0703206	0.245154	0.6539	1	no
XLOC_000609	XLOC_000609	RP1-228H13.5	chr1:40464318-40466767	Control_1_hr	Zn_1_hr	OK	0.645429	0.733833	0.185193	0.58725	0.31165	1	no
XLOC_000610	XLOC_000610	RP11-656D10.7	chr1:40473054-40474059	Control_1_hr	Zn_1_hr	NOTEST	0.0228274	0	#NAME?	0	1	1	no
XLOC_000611	XLOC_000611	ZFP69	chr1:40477214-40508661	Control_1_hr	Zn_1_hr	NOTEST	0.056	0.00889535	-2.6543	0	1	1	no
XLOC_000612	XLOC_000612	EXO5	chr1:40508740-40517174	Control_1_hr	Zn_1_hr	OK	3.23543	3.42126	0.080574	0.278846	0.56515	1	no
XLOC_000613	XLOC_000613	ZNF684	chr1:40531560-40548169	Control_1_hr	Zn_1_hr	OK	1.63391	1.91456	0.228687	0.498561	0.36365	1	no
XLOC_000614	XLOC_000614	RP1-63P18.2	chr1:40563533-40563659	Control_1_hr	Zn_1_hr	NOTEST	0	0	0	0	1	1	no
XLOC_000615	XLOC_000615	NFYC	chr1:40690379-40771603	Control_1_hr	Zn_1_hr	OK	25.5322	27.613	0.113031	0.587795	0.28155	1	no
XLOC_000616	XLOC_000616	MIR30E	chr1:40690379-40771603	Control_1_hr	Zn_1_hr	NOTEST	0	0	0	0	1	1	no
XLOC_000617	XLOC_000617	MIR30C1	chr1:40690379-40771603	Control_1_hr	Zn_1_hr	NOTEST	0	0	0	0	1	1	no
XLOC_000618	XLOC_000618	KCNQ4	chr1:40784011-40840452	Control_1_hr	Zn_1_hr	NOTEST	0.0806798	0.114629	0.506693	0	1	1	no
XLOC_000619	XLOC_000619	RN7SL326P	chr1:40784011-40840452	Control_1_hr	Zn_1_hr	NOTEST	0.108128	0	#NAME?	0	1	1	no
XLOC_000620	XLOC_000620	RP5-1066H13.4	chr1:40863913-40876670	Control_1_hr	Zn_1_hr	NOTEST	0	0.0283988	inf	0	1	1	no
XLOC_000621	XLOC_000621	AL391730.1	chr1:40938103-40939767	Control_1_hr	Zn_1_hr	NOTEST	0	0	0	0	1	1	no
XLOC_000622	XLOC_000622	CTPS1	chr1:40979334-41012565	Control_1_hr	Zn_1_hr	OK	111.222	111	-0.00288107	-0.0156474	0.9771	1	no
XLOC_000623	XLOC_000623	SLFNL1-AS1	chr1:41014589-41242154	Control_1_hr	Zn_1_hr	OK	1.21108	1.20337	-0.00921993	-0.0216682	0.97	1	no
XLOC_000624	XLOC_000624	RP4-635E8.1	chr1:41014589-41242154	Control_1_hr	Zn_1_hr	NOTEST	0	0	0	0	1	1	no
XLOC_000625	XLOC_000625	RP11-399E6.1	chr1:41242372-41284861	Control_1_hr	Zn_1_hr	NOTEST	0.0425661	0.0183756	-1.21191	0	1	1	no
XLOC_000626	XLOC_000626	AC093151.2	chr1:41332110-41332244	Control_1_hr	Zn_1_hr	NOTEST	0	0	0	0	1	1	no
XLOC_000627	XLOC_000627	FOXO6	chr1:41361921-41383590	Control_1_hr	Zn_1_hr	NOTEST	0.0641387	0.0141531	-2.18008	0	1	1	no
XLOC_000628	XLOC_000628	RP11-486B10.3	chr1:41506364-42035925	Control_1_hr	Zn_1_hr	NOTEST	0	0	0	0	1	1	no
XLOC_000629	XLOC_000629	RP11-486B10.4	chr1:41506364-42035925	Control_1_hr	Zn_1_hr	NOTEST	0.00617714	0.00829924	0.426042	0	1	1	no
XLOC_000630	XLOC_000630	AL451006.1	chr1:41506364-42035925	Control_1_hr	Zn_1_hr	NOTEST	0	0	0	0	1	1	no
XLOC_000631	XLOC_000631	HNRNPFP1	chr1:42040596-42041729	Control_1_hr	Zn_1_hr	NOTEST	0.0140062	0	#NAME?	0	1	1	no
XLOC_000632	XLOC_000632	RP11-319C21.1	chr1:42140634-42141391	Control_1_hr	Zn_1_hr	NOTEST	0	0	0	0	1	1	no
XLOC_000633	XLOC_000633	GUCA2B	chr1:42153420-42155824	Control_1_hr	Zn_1_hr	NOTEST	0.183619	0.268559	0.548524	0	1	1	no
XLOC_000634	XLOC_000634	RIMKLA	chr1:42380794-42422578	Control_1_hr	Zn_1_hr	OK	2.41055	2.57014	0.0924814	0.24667	0.6654	1	no
XLOC_000635	XLOC_000635	CCDC30,PPCS	chr1:42430328-42654664	Control_1_hr	Zn_1_hr	OK	33.6496	30.7436	-0.130302	-0.716361	0.2055	1	no
XLOC_000636	XLOC_000636	RP11-163G10.2	chr1:42430328-42654664	Control_1_hr	Zn_1_hr	NOTEST	0	0.0140583	inf	0	1	1	no
XLOC_000637	XLOC_000637	RNU6-536P	chr1:42430328-42654664	Control_1_hr	Zn_1_hr	NOTEST	0	0	0	0	1	1	no
XLOC_000638	XLOC_000638	RP11-163G10.4	chr1:42430328-42654664	Control_1_hr	Zn_1_hr	NOTEST	0	0	0	0	1	1	no
XLOC_000639	XLOC_000639	PPIH	chr1:42658424-42676758	Control_1_hr	Zn_1_hr	OK	29.5891	28.431	-0.0575995	-0.381668	0.5033	1	no
XLOC_000640	XLOC_000640	RP5-994D16.3	chr1:42678734-42681659	Control_1_hr	Zn_1_hr	NOTEST	0.138067	0.160325	0.215634	0	1	1	no
XLOC_000641	XLOC_000641	YBX1	chr1:42682426-42702349	Control_1_hr	Zn_1_hr	OK	188.265	177.855	-0.0820603	-0.546978	0.3393	1	no
XLOC_000642	XLOC_000642	C1orf50,RP5-994D16.11	chr1:42767268-42798230	Control_1_hr	Zn_1_hr	OK	4.47698	5.12054	0.193771	0.827501	0.1206	1	no
XLOC_000643	XLOC_000643	ERMAP	chr1:42807051-42846422	Control_1_hr	Zn_1_hr	OK	2.66491	2.88978	0.116876	0.480026	0.3882	1	no
XLOC_000644	XLOC_000644	ZNF691	chr1:42846572-42852477	Control_1_hr	Zn_1_hr	OK	3.92171	5.0521	0.3654	1.94004	0.0005	0.0867737	no
XLOC_000645	XLOC_000645	ATP6V1E1P1	chr1:42903231-42903912	Control_1_hr	Zn_1_hr	OK	4.98636	5.74968	0.205493	0.847681	0.14075	1	no
XLOC_000646	XLOC_000646	SLC2A1-AS1	chr1:42925374-42983358	Control_1_hr	Zn_1_hr	NOTEST	0.285424	0.325095	0.187753	0	1	1	no
XLOC_000647	XLOC_000647	RNU6-880P	chr1:42991437-42991544	Control_1_hr	Zn_1_hr	NOTEST	0	0	0	0	1	1	no
XLOC_000648	XLOC_000648	RP3-393B19.1	chr1:43104085-43104497	Control_1_hr	Zn_1_hr	NOTEST	0	0	0	0	1	1	no
XLOC_000649	XLOC_000649	FAM183A	chr1:43145152-43156396	Control_1_hr	Zn_1_hr	NOTEST	0.278245	0.134241	-1.05153	0	1	1	no
XLOC_000650	XLOC_000650	CFAP57	chr1:43164174-43274002	Control_1_hr	Zn_1_hr	OK	0.296191	0.598273	1.01428	0.407681	0.2906	1	no
XLOC_000651	XLOC_000651	RNA5SP46	chr1:43164174-43274002	Control_1_hr	Zn_1_hr	NOTEST	0	0	0	0	1	1	no
XLOC_000652	XLOC_000652	TMEM125	chr1:43164174-43274002	Control_1_hr	Zn_1_hr	NOTEST	0	0	0	0	1	1	no
XLOC_000653	XLOC_000653	TIE1	chr1:43300992-43323108	Control_1_hr	Zn_1_hr	NOTEST	0.0533916	0.0489293	-0.125916	0	1	1	no
XLOC_000654	XLOC_000654	MPL	chr1:43337806-43352772	Control_1_hr	Zn_1_hr	NOTEST	0.0511318	0.0235164	-1.12055	0	1	1	no
XLOC_000655	XLOC_000655	CDC20	chr1:43358954-43363203	Control_1_hr	Zn_1_hr	OK	62.3852	63.3808	0.022843	0.143132	0.79755	1	no
XLOC_000656	XLOC_000656	RP1-92O14.6	chr1:43383916-43389808	Control_1_hr	Zn_1_hr	NOTEST	0.168543	0.214228	0.346029	0	1	1	no
XLOC_000657	XLOC_000657	SZT2	chr1:43389881-43456995	Control_1_hr	Zn_1_hr	OK	3.89979	3.50506	-0.153959	-0.406269	0.44585	1	no
XLOC_000658	XLOC_000658	MIR6735	chr1:43389881-43456995	Control_1_hr	Zn_1_hr	NOTEST	0	0	0	0	1	1	no
XLOC_000659	XLOC_000659	HYI-AS1	chr1:43389881-43456995	Control_1_hr	Zn_1_hr	NOTEST	0.141558	0.0995816	-0.507439	0	1	1	no
XLOC_000660	XLOC_000660	PTPRF	chr1:43525186-43623666	Control_1_hr	Zn_1_hr	OK	57.767	62.9503	0.123969	0.821757	0.15145	1	no
XLOC_000661	XLOC_000661	KDM4A	chr1:43650157-43931165	Control_1_hr	Zn_1_hr	OK	8.73544	9.09623	0.0583874	0.318521	0.5639	1	no
XLOC_000662	XLOC_000662	ST3GAL3	chr1:43650157-43931165	Control_1_hr	Zn_1_hr	OK	2.76151	1.74945	-0.658554	-0.643719	0.096	1	no
XLOC_000663	XLOC_000663	RP11-184I16.3	chr1:43650157-43931165	Control_1_hr	Zn_1_hr	NOTEST	0	0	0	0	1	1	no
XLOC_000664	XLOC_000664	ARTN	chr1:43933319-43937241	Control_1_hr	Zn_1_hr	NOTEST	0.357723	0.322624	-0.14899	0	1	1	no
XLOC_000665	XLOC_000665	IPO13	chr1:43946938-43968022	Control_1_hr	Zn_1_hr	OK	10.5142	10.1485	-0.0510712	-0.190737	0.70495	1	no
XLOC_000666	XLOC_000666	DPH2	chr1:43969999-43973369	Control_1_hr	Zn_1_hr	OK	22.616	22.4402	-0.0112608	-0.0598892	0.9137	1	no
XLOC_000667	XLOC_000667	ATP6V0B	chr1:43974486-43978295	Control_1_hr	Zn_1_hr	OK	68.8642	70.7448	0.0388715	0.243961	0.66265	1	no
XLOC_000668	XLOC_000668	B4GALT2	chr1:43978942-43991170	Control_1_hr	Zn_1_hr	OK	38.3492	41.2502	0.105203	0.638621	0.2548	1	no
XLOC_000669	XLOC_000669	CCDC24	chr1:43991358-44115913	Control_1_hr	Zn_1_hr	OK	8.53666	7.59598	-0.168435	-0.469832	0.41065	1	no
XLOC_000670	XLOC_000670	AL139220.1,RP5-1198O20.4	chr1:43991358-44115913	Control_1_hr	Zn_1_hr	OK	7.46284	2.47594	-1.59175	-1.81596	0.0012	0.167664	no
XLOC_000671	XLOC_000671	KLF17	chr1:44118849-44135140	Control_1_hr	Zn_1_hr	NOTEST	0.0311233	0.0596065	0.937476	0	1	1	no
XLOC_000672	XLOC_000672	DMAP1	chr1:44213454-44220681	Control_1_hr	Zn_1_hr	OK	14.5673	14.7749	0.0204157	0.104776	0.85155	1	no
XLOC_000673	XLOC_000673	RNU6-369P	chr1:44390721-44390823	Control_1_hr	Zn_1_hr	NOTEST	0	0	0	0	1	1	no
XLOC_000674	XLOC_000674	RNF220	chr1:44405193-44674555	Control_1_hr	Zn_1_hr	OK	38.181	37.0855	-0.0420002	-0.198625	0.7291	1	no
XLOC_000675	XLOC_000675	MIR5584	chr1:44405193-44674555	Control_1_hr	Zn_1_hr	NOTEST	0	0	0	0	1	1	no
XLOC_000676	XLOC_000676	C1orf228	chr1:44674691-44725591	Control_1_hr	Zn_1_hr	OK	1.10921	0.595313	-0.897813	-0.671981	0.0073	0.581426	no
XLOC_000677	XLOC_000677	KIF2C	chr1:44739817-44778779	Control_1_hr	Zn_1_hr	OK	21.5189	20.9496	-0.0386831	-0.10901	0.83475	1	no
XLOC_000678	XLOC_000678	RPS8,SNORD38A,SNORD38B,SNORD55	chr1:44739817-44778779	Control_1_hr	Zn_1_hr	OK	300.228	298.39	-0.00885801	-0.0520243	0.92605	1	no
XLOC_000679	XLOC_000679	SNORD46	chr1:44739817-44778779	Control_1_hr	Zn_1_hr	OK	14.002	21.4921	0.618167	1.57248	0.71375	1	no
XLOC_000680	XLOC_000680	PLK3	chr1:44800224-44806675	Control_1_hr	Zn_1_hr	OK	6.77646	7.97685	0.235289	1.25188	0.0314	1	no
XLOC_000681	XLOC_000681	BTBD19	chr1:44808481-44815585	Control_1_hr	Zn_1_hr	OK	2.56844	3.11374	0.277755	0.612903	0.23365	1	no
XLOC_000682	XLOC_000682	RNA5SP47	chr1:44850521-44986722	Control_1_hr	Zn_1_hr	NOTEST	0	0	0	0	1	1	no
XLOC_000683	XLOC_000683	CCNB1IP1P1	chr1:44850521-44986722	Control_1_hr	Zn_1_hr	NOTEST	0	0	0	0	1	1	no
XLOC_000684	XLOC_000684	UROD	chr1:45012146-45015575	Control_1_hr	Zn_1_hr	OK	25.4964	27.5409	0.11128	0.599457	0.28975	1	no
XLOC_000685	XLOC_000685	LINC01144	chr1:45016398-45306209	Control_1_hr	Zn_1_hr	NOTEST	0.22416	0.258189	0.203895	0	1	1	no
XLOC_000686	XLOC_000686	HPDL	chr1:45326904-45328533	Control_1_hr	Zn_1_hr	OK	3.04913	2.78247	-0.132032	-0.691909	0.2312	1	no
XLOC_000687	XLOC_000687	TOE1	chr1:45329162-45491166	Control_1_hr	Zn_1_hr	OK	10.1927	9.5253	-0.0976939	-0.430045	0.4431	1	no
XLOC_000688	XLOC_000688	RP11-291L19.1	chr1:45329162-45491166	Control_1_hr	Zn_1_hr	NOTEST	0	0.232971	inf	0	1	1	no
XLOC_000689	XLOC_000689	MMACHC	chr1:45493865-45523047	Control_1_hr	Zn_1_hr	OK	1.34765	1.21185	-0.153235	-0.0490991	0.91355	1	no
XLOC_000690	XLOC_000690	HMGB1P48	chr1:45530926-45532139	Control_1_hr	Zn_1_hr	NOTEST	0	0	0	0	1	1	no
XLOC_000691	XLOC_000691	AKR1A1	chr1:45550542-45570049	Control_1_hr	Zn_1_hr	OK	72.1697	67.6748	-0.0927747	-0.527986	0.3527	1	no
XLOC_000692	XLOC_000692	NASP	chr1:45583845-45618904	Control_1_hr	Zn_1_hr	OK	72.9332	76.9892	0.0780818	0.388814	0.4962	1	no
XLOC_000693	XLOC_000693	TMEM69	chr1:45627303-45750650	Control_1_hr	Zn_1_hr	OK	12.0149	12.2987	0.0336826	0.0783382	0.894	1	no
XLOC_000694	XLOC_000694	RP11-630I5.1	chr1:45781276-45781957	Control_1_hr	Zn_1_hr	OK	0.295396	0.396542	0.424823	0.391078	0.44155	1	no
XLOC_000695	XLOC_000695	MAST2	chr1:45786986-46036124	Control_1_hr	Zn_1_hr	OK	18.409	18.5467	0.0107479	0.0475779	0.91735	1	no
XLOC_000696	XLOC_000696	RP4-533D7.4	chr1:46040139-46185958	Control_1_hr	Zn_1_hr	NOTEST	0	0.0197414	inf	0	1	1	no
XLOC_000697	XLOC_000697	RP4-533D7.3	chr1:46040139-46185958	Control_1_hr	Zn_1_hr	NOTEST	0	0	0	0	1	1	no
XLOC_000698	XLOC_000698	RP4-533D7.5	chr1:46040139-46185958	Control_1_hr	Zn_1_hr	NOTEST	0.160568	0.191883	0.257046	0	1	1	no
XLOC_000699	XLOC_000699	TSPAN1	chr1:46040139-46185958	Control_1_hr	Zn_1_hr	OK	3.04956	3.19998	0.0694644	0.211884	0.69055	1	no
XLOC_000700	XLOC_000700	LURAP1	chr1:46188681-46221261	Control_1_hr	Zn_1_hr	NOTEST	0.00761659	0.0109537	0.524195	0	1	1	no
XLOC_000701	XLOC_000701	RAD54L	chr1:46247687-46303608	Control_1_hr	Zn_1_hr	OK	8.78187	9.09465	0.0504896	0.118927	0.8242	1	no
XLOC_000702	XLOC_000702	UQCRH	chr1:46303630-46316776	Control_1_hr	Zn_1_hr	OK	153.569	157.537	0.0367962	0.237662	0.68505	1	no
XLOC_000703	XLOC_000703	NSUN4	chr1:46340176-46365152	Control_1_hr	Zn_1_hr	OK	9.57429	11.3028	0.239443	1.02763	0.06505	1	no
XLOC_000704	XLOC_000704	RP4-603I14.3	chr1:46370585-46370955	Control_1_hr	Zn_1_hr	NOTEST	0	0	0	0	1	1	no
XLOC_000705	XLOC_000705	FAAH	chr1:46394264-46413848	Control_1_hr	Zn_1_hr	OK	0.745747	1.4834	0.992152	1.45339	0.00375	0.391305	no
XLOC_000706	XLOC_000706	FAAHP1	chr1:46432128-46445521	Control_1_hr	Zn_1_hr	NOTEST	0.136896	0.0849198	-0.688906	0	1	1	no
XLOC_000707	XLOC_000707	LINC00505	chr1:46455822-46482475	Control_1_hr	Zn_1_hr	NOTEST	0	0	0	0	1	1	no
XLOC_000708	XLOC_000708	DMBX1	chr1:46506995-46514226	Control_1_hr	Zn_1_hr	OK	0.73701	0.711439	-0.0509454	-0.174187	0.75305	1	no
XLOC_000709	XLOC_000709	MKNK1-AS1	chr1:46538695-46616891	Control_1_hr	Zn_1_hr	NOTEST	0.0376777	0.0369648	-0.0275584	0	1	1	no
XLOC_000710	XLOC_000710	TEX38	chr1:46632736-46673867	Control_1_hr	Zn_1_hr	NOTEST	0.052671	0.0492654	-0.0964331	0	1	1	no
XLOC_000711	XLOC_000711	EFCAB14-AS1	chr1:46674035-46719064	Control_1_hr	Zn_1_hr	NOTEST	0	0.0444816	inf	0	1	1	no
XLOC_000712	XLOC_000712	RP11-8J9.5	chr1:46742328-46743133	Control_1_hr	Zn_1_hr	NOTEST	0	0	0	0	1	1	no
XLOC_000713	XLOC_000713	CYP4B1	chr1:46757837-46819413	Control_1_hr	Zn_1_hr	NOTEST	0.0388596	0	#NAME?	0	1	1	no
XLOC_000714	XLOC_000714	RP11-346M5.1	chr1:46843094-46900437	Control_1_hr	Zn_1_hr	NOTEST	0	0	0	0	1	1	no
XLOC_000715	XLOC_000715	CYP4X1	chr1:47023567-47050751	Control_1_hr	Zn_1_hr	NOTEST	0.0147986	0.0207973	0.490938	0	1	1	no
XLOC_000716	XLOC_000716	CYP4Z1	chr1:47067487-47180339	Control_1_hr	Zn_1_hr	NOTEST	0	0	0	0	1	1	no
XLOC_000717	XLOC_000717	CYP4A22	chr1:47067487-47180339	Control_1_hr	Zn_1_hr	NOTEST	0.00796381	0	#NAME?	0	1	1	no
XLOC_000718	XLOC_000718	LINC00853	chr1:47067487-47180339	Control_1_hr	Zn_1_hr	OK	0.660215	0.583414	-0.178416	-0.205606	0.7325	1	no
XLOC_000719	XLOC_000719	RP1-18D14.7	chr1:47216289-47232220	Control_1_hr	Zn_1_hr	NOTEST	0	0	0	0	1	1	no
XLOC_000720	XLOC_000720	CMPK1	chr1:47333796-47378839	Control_1_hr	Zn_1_hr	OK	63.9886	62.1812	-0.0413374	-0.226115	0.6924	1	no
XLOC_000721	XLOC_000721	FOXE3	chr1:47416071-47418052	Control_1_hr	Zn_1_hr	NOTEST	0.0208962	0	#NAME?	0	1	1	no
XLOC_000722	XLOC_000722	FOXD2	chr1:47436016-47440691	Control_1_hr	Zn_1_hr	OK	0.605297	0.504634	-0.262407	-1.0404	0.0744	1	no
XLOC_000723	XLOC_000723	AL356458.1	chr1:47502503-47502639	Control_1_hr	Zn_1_hr	NOTEST	0	0	0	0	1	1	no
XLOC_000724	XLOC_000724	ATP6V0E1P4	chr1:47550195-47550753	Control_1_hr	Zn_1_hr	NOTEST	0	0	0	0	1	1	no
XLOC_000725	XLOC_000725	RP11-543D5.1	chr1:47688462-47703383	Control_1_hr	Zn_1_hr	NOTEST	0	0	0	0	1	1	no
XLOC_000726	XLOC_000726	RP11-330M19.1	chr1:47760527-47996895	Control_1_hr	Zn_1_hr	NOTEST	0	0.00489346	inf	0	1	1	no
XLOC_000727	XLOC_000727	RP4-683M8.2	chr1:48053544-48067201	Control_1_hr	Zn_1_hr	NOTEST	0	0	0	0	1	1	no
XLOC_000728	XLOC_000728	CYP46A4P	chr1:48089367-48089634	Control_1_hr	Zn_1_hr	NOTEST	0	0.0939995	inf	0	1	1	no
XLOC_000729	XLOC_000729	AL356289.1	chr1:48096091-48182428	Control_1_hr	Zn_1_hr	NOTEST	0.018274	0.00322744	-2.50133	0	1	1	no
XLOC_000730	XLOC_000730	RP5-1024N4.2	chr1:48205964-48206843	Control_1_hr	Zn_1_hr	NOTEST	0	0	0	0	1	1	no
XLOC_000731	XLOC_000731	SLC5A9	chr1:48222684-48248644	Control_1_hr	Zn_1_hr	NOTEST	0.0878691	0.0822322	-0.095653	0	1	1	no
XLOC_000732	XLOC_000732	RNU6-723P	chr1:48295371-48472208	Control_1_hr	Zn_1_hr	NOTEST	0	0	0	0	1	1	no
XLOC_000733	XLOC_000733	RP11-329A14.1	chr1:48295371-48472208	Control_1_hr	Zn_1_hr	OK	8.012	8.09144	0.0142329	0.066415	0.90895	1	no
XLOC_000734	XLOC_000734	RNU4-61P	chr1:48295371-48472208	Control_1_hr	Zn_1_hr	NOTEST	0	0	0	0	1	1	no
XLOC_000735	XLOC_000735	RP11-141A19.1	chr1:48532854-50023913	Control_1_hr	Zn_1_hr	NOTEST	0	0	0	0	1	1	no
XLOC_000736	XLOC_000736	RP11-141A19.2	chr1:48532854-50023913	Control_1_hr	Zn_1_hr	NOTEST	0	0	0	0	1	1	no
XLOC_000737	XLOC_000737	ZNF859P	chr1:48532854-50023913	Control_1_hr	Zn_1_hr	NOTEST	0	0.00445454	inf	0	1	1	no
XLOC_000738	XLOC_000738	AL645730.1	chr1:48532854-50023913	Control_1_hr	Zn_1_hr	NOTEST	0	0	0	0	1	1	no
XLOC_000739	XLOC_000739	RP11-93G23.2	chr1:48532854-50023913	Control_1_hr	Zn_1_hr	NOTEST	0.0374297	0.0328184	-0.189678	0	1	1	no
XLOC_000740	XLOC_000740	MTND2P29	chr1:48532854-50023913	Control_1_hr	Zn_1_hr	NOTEST	0	0	0	0	1	1	no
XLOC_000741	XLOC_000741	ELAVL4	chr1:50048013-50203786	Control_1_hr	Zn_1_hr	NOTEST	0.0105945	0.00718619	-0.560016	0	1	1	no
XLOC_000742	XLOC_000742	RP11-492I2.1	chr1:50048013-50203786	Control_1_hr	Zn_1_hr	NOTEST	0	0	0	0	1	1	no
XLOC_000743	XLOC_000743	RP11-183G22.1	chr1:50326130-50327007	Control_1_hr	Zn_1_hr	NOTEST	0.259523	0.1904	-0.446825	0	1	1	no
XLOC_000744	XLOC_000744	RP5-850O15.3	chr1:50437027-50960263	Control_1_hr	Zn_1_hr	NOTEST	0	0	0	0	1	1	no
XLOC_000745	XLOC_000745	RNU6-1026P	chr1:50437027-50960263	Control_1_hr	Zn_1_hr	NOTEST	0	0	0	0	1	1	no
XLOC_000746	XLOC_000746	PHBP12	chr1:50437027-50960263	Control_1_hr	Zn_1_hr	NOTEST	0.0799761	0.0498731	-0.681308	0	1	1	no
XLOC_000747	XLOC_000747	MRPS6P2	chr1:50437027-50960263	Control_1_hr	Zn_1_hr	NOTEST	0	0	0	0	1	1	no
XLOC_000748	XLOC_000748	CDKN2C	chr1:50960744-50974633	Control_1_hr	Zn_1_hr	OK	13.857	12.4339	-0.15634	-0.939299	0.10035	1	no
XLOC_000749	XLOC_000749	MIR4421	chr1:51059836-51059905	Control_1_hr	Zn_1_hr	NOTEST	0	0	0	0	1	1	no
XLOC_000750	XLOC_000750	MIR6500	chr1:51060017-51060103	Control_1_hr	Zn_1_hr	NOTEST	0	0	0	0	1	1	no
XLOC_000751	XLOC_000751	C1orf185	chr1:51102233-51148086	Control_1_hr	Zn_1_hr	NOTEST	0	0	0	0	1	1	no
XLOC_000752	XLOC_000752	Y_RNA	chr1:51102233-51148086	Control_1_hr	Zn_1_hr	NOTEST	0	0	0	0	1	1	no
XLOC_000753	XLOC_000753	AL162430.1	chr1:51188462-51188551	Control_1_hr	Zn_1_hr	NOTEST	0	0	0	0	1	1	no
XLOC_000754	XLOC_000754	RNF11	chr1:51236270-51273455	Control_1_hr	Zn_1_hr	OK	18.0396	20.7456	0.201643	0.747573	0.1896	1	no
XLOC_000755	XLOC_000755	TTC39A-AS1	chr1:51287257-51345116	Control_1_hr	Zn_1_hr	NOTEST	0.134757	0.0289521	-2.21862	0	1	1	no
XLOC_000756	XLOC_000756	RP11-275F13.3	chr1:51354262-51561629	Control_1_hr	Zn_1_hr	NOTEST	0.0172243	0.0341334	0.986737	0	1	1	no
XLOC_000757	XLOC_000757	RNU6-877P	chr1:51354262-51561629	Control_1_hr	Zn_1_hr	NOTEST	0	0	0	0	1	1	no
XLOC_000758	XLOC_000758	RP11-253A20.1	chr1:51354262-51561629	Control_1_hr	Zn_1_hr	NOTEST	0	0.0325851	inf	0	1	1	no
XLOC_000759	XLOC_000759	RP11-191G24.1	chr1:51354262-51561629	Control_1_hr	Zn_1_hr	NOTEST	0	0.0462661	inf	0	1	1	no
XLOC_000760	XLOC_000760	OSBPL9,RP4-657D16.3	chr1:51561865-51878937	Control_1_hr	Zn_1_hr	OK	27.7058	26.8084	-0.0475055	-0.127381	0.7861	1	no
XLOC_000761	XLOC_000761	SLC25A6P3	chr1:51561865-51878937	Control_1_hr	Zn_1_hr	NOTEST	0	0.0131863	inf	0	1	1	no
XLOC_000762	XLOC_000762	RP4-657D16.6	chr1:51561865-51878937	Control_1_hr	Zn_1_hr	NOTEST	0	0.0907856	inf	0	1	1	no
XLOC_000763	XLOC_000763	TSEN15P2	chr1:51561865-51878937	Control_1_hr	Zn_1_hr	NOTEST	0	0.0526809	inf	0	1	1	no
XLOC_000764	XLOC_000764	RNA5SP48	chr1:51907955-51990764	Control_1_hr	Zn_1_hr	NOTEST	0	0	0	0	1	1	no
XLOC_000765	XLOC_000765	RP11-91A18.1	chr1:51907955-51990764	Control_1_hr	Zn_1_hr	NOTEST	0	0	0	0	1	1	no
XLOC_000766	XLOC_000766	RN7SL290P	chr1:51995739-51996039	Control_1_hr	Zn_1_hr	NOTEST	0	0	0	0	1	1	no
XLOC_000767	XLOC_000767	RP11-91A18.4	chr1:52020130-52090716	Control_1_hr	Zn_1_hr	NOTEST	0.0442665	0.0248843	-0.830979	0	1	1	no
XLOC_000768	XLOC_000768	TXNDC12-AS1	chr1:52020130-52090716	Control_1_hr	Zn_1_hr	NOTEST	0	0	0	0	1	1	no
XLOC_000769	XLOC_000769	BTF3L4	chr1:52020130-52090716	Control_1_hr	Zn_1_hr	OK	9.0737	8.95995	-0.0182009	-0.039991	0.94585	1	no
XLOC_000770	XLOC_000770	ZFYVE9	chr1:52142093-52366193	Control_1_hr	Zn_1_hr	OK	3.92313	3.61491	-0.118046	-0.360425	0.5246	1	no
XLOC_000771	XLOC_000771	RN7SL788P	chr1:52142093-52366193	Control_1_hr	Zn_1_hr	NOTEST	0	0	0	0	1	1	no
XLOC_000772	XLOC_000772	PDCL3P6	chr1:52142093-52366193	Control_1_hr	Zn_1_hr	NOTEST	0.0252542	0.0906834	1.84431	0	1	1	no
XLOC_000773	XLOC_000773	ANAPC10P1	chr1:52142093-52366193	Control_1_hr	Zn_1_hr	OK	1.16069	1.14226	-0.0230895	-0.0115045	0.98075	1	no
XLOC_000774	XLOC_000774	RP11-155O18.6	chr1:52142093-52366193	Control_1_hr	Zn_1_hr	OK	0.380428	0.3145	-0.274561	-0.0575659	0.8114	1	no
XLOC_000775	XLOC_000775	PLA2G12AP1	chr1:52368676-52369244	Control_1_hr	Zn_1_hr	OK	2.08067	1.82042	-0.192774	-0.416991	0.44765	1	no
XLOC_000776	XLOC_000776	PRPF38A	chr1:52404563-52553487	Control_1_hr	Zn_1_hr	OK	9.57454	9.20086	-0.0574339	-0.141124	0.80465	1	no
XLOC_000777	XLOC_000777	RP11-25O10.2	chr1:52554817-52555273	Control_1_hr	Zn_1_hr	NOTEST	0	0	0	0	1	1	no
XLOC_000778	XLOC_000778	EEF1GP7	chr1:52573113-52573816	Control_1_hr	Zn_1_hr	NOTEST	0.0244615	0.0176781	-0.468549	0	1	1	no
XLOC_000779	XLOC_000779	GPX7	chr1:52602371-52609051	Control_1_hr	Zn_1_hr	NOTEST	0	0	0	0	1	1	no
XLOC_000780	XLOC_000780	FAM159A	chr1:52633343-52669683	Control_1_hr	Zn_1_hr	NOTEST	0.0225129	0.00548917	-2.03609	0	1	1	no
XLOC_000781	XLOC_000781	NDUFS5P3	chr1:52709121-52709442	Control_1_hr	Zn_1_hr	NOTEST	0	0	0	0	1	1	no
XLOC_000782	XLOC_000782	RN7SL62P	chr1:52714398-52714695	Control_1_hr	Zn_1_hr	NOTEST	0	0	0	0	1	1	no
XLOC_000783	XLOC_000783	ZYG11B	chr1:52726466-52827342	Control_1_hr	Zn_1_hr	OK	4.25913	4.16411	-0.0325508	-0.12234	0.8344	1	no
XLOC_000784	XLOC_000784	RNU2-30P	chr1:52726466-52827342	Control_1_hr	Zn_1_hr	NOTEST	0	0	0	0	1	1	no
XLOC_000785	XLOC_000785	ZYG11A	chr1:52842510-52894998	Control_1_hr	Zn_1_hr	OK	1.35441	1.36278	0.00888735	0.0520621	0.9265	1	no
XLOC_000786	XLOC_000786	RP4-631H13.6	chr1:52895909-52927212	Control_1_hr	Zn_1_hr	OK	15.5962	13.1696	-0.24398	-0.226975	0.6992	1	no
XLOC_000787	XLOC_000787	SCP2,TUBBP10	chr1:52927228-53051703	Control_1_hr	Zn_1_hr	OK	50.2226	49.9359	-0.00825916	-0.0434665	0.93835	1	no
XLOC_000788	XLOC_000788	MIR1273F	chr1:52927228-53051703	Control_1_hr	Zn_1_hr	NOTEST	0	0	0	0	1	1	no
XLOC_000789	XLOC_000789	MIR5095	chr1:52927228-53051703	Control_1_hr	Zn_1_hr	NOTEST	0	0	0	0	1	1	no
XLOC_000790	XLOC_000790	MIR1273G	chr1:52927228-53051703	Control_1_hr	Zn_1_hr	NOTEST	0	0	0	0	1	1	no
XLOC_000791	XLOC_000791	PODN	chr1:53062051-53085502	Control_1_hr	Zn_1_hr	NOTEST	0.0199401	0.0322343	0.692923	0	1	1	no
XLOC_000792	XLOC_000792	RP11-334A14.8	chr1:53087178-53142632	Control_1_hr	Zn_1_hr	NOTEST	0.0154529	0.0225596	0.545866	0	1	1	no
XLOC_000793	XLOC_000793	RP5-1024G6.9	chr1:53180920-53186900	Control_1_hr	Zn_1_hr	NOTEST	0	0	0	0	1	1	no
XLOC_000794	XLOC_000794	CPT2	chr1:53196428-53220617	Control_1_hr	Zn_1_hr	OK	4.07952	4.08632	0.00240216	0.00830761	0.98785	1	no
XLOC_000795	XLOC_000795	RP5-1024G6.7	chr1:53220662-53224253	Control_1_hr	Zn_1_hr	NOTEST	0.00924663	0.00651638	-0.504855	0	1	1	no
XLOC_000796	XLOC_000796	RP5-1024G6.5	chr1:53226891-53328070	Control_1_hr	Zn_1_hr	OK	0.373299	0.319114	-0.22626	-0.0764633	0.90435	1	no
XLOC_000797	XLOC_000797	RP4-784A16.1	chr1:53226891-53328070	Control_1_hr	Zn_1_hr	NOTEST	0	0	0	0	1	1	no
XLOC_000798	XLOC_000798	RP4-784A16.2	chr1:53226891-53328070	Control_1_hr	Zn_1_hr	NOTEST	0.107393	0.0574081	-0.903573	0	1	1	no
XLOC_000799	XLOC_000799	RP4-784A16.4	chr1:53226891-53328070	Control_1_hr	Zn_1_hr	NOTEST	0.0785263	0	#NAME?	0	1	1	no
XLOC_000800	XLOC_000800	RP4-784A16.5	chr1:53328232-53336509	Control_1_hr	Zn_1_hr	OK	0.512723	0.32234	-0.669594	-0.554691	0.3131	1	no
XLOC_000801	XLOC_000801	DMRTB1	chr1:53459398-53467488	Control_1_hr	Zn_1_hr	NOTEST	0	0	0	0	1	1	no
XLOC_000802	XLOC_000802	RP4-654H19.2	chr1:53841546-53841832	Control_1_hr	Zn_1_hr	NOTEST	0.113937	0	#NAME?	0	1	1	no
XLOC_000803	XLOC_000803	DIO1	chr1:53891238-53911086	Control_1_hr	Zn_1_hr	NOTEST	0.0141829	0.0129255	-0.133931	0	1	1	no
XLOC_000804	XLOC_000804	LRRC42	chr1:53946076-53968168	Control_1_hr	Zn_1_hr	OK	18.7294	18.6847	-0.00345275	-0.0207516	0.96955	1	no
XLOC_000805	XLOC_000805	MIR4781,TCEANC2	chr1:54053586-54112519	Control_1_hr	Zn_1_hr	OK	2.26548	1.41098	-0.683114	-0.992819	0.02565	1	no
XLOC_000806	XLOC_000806	RP4-758J24.4	chr1:54053586-54112519	Control_1_hr	Zn_1_hr	NOTEST	0	0	0	0	1	1	no
XLOC_000807	XLOC_000807	RP11-446E24.3	chr1:54133073-54413479	Control_1_hr	Zn_1_hr	NOTEST	0	0	0	0	1	1	no
XLOC_000808	XLOC_000808	MRPL37	chr1:54133073-54413479	Control_1_hr	Zn_1_hr	OK	61.0801	62.1436	0.0249029	0.147177	0.7957	1	no
XLOC_000809	XLOC_000809	SSBP3-AS1	chr1:54133073-54413479	Control_1_hr	Zn_1_hr	NOTEST	0.101369	0.0531678	-0.93099	0	1	1	no
XLOC_000810	XLOC_000810	RP5-997D24.3	chr1:54133073-54413479	Control_1_hr	Zn_1_hr	NOTEST	0	0	0	0	1	1	no
XLOC_000811	XLOC_000811	RP4-705F19.1	chr1:54416255-54420860	Control_1_hr	Zn_1_hr	NOTEST	0	0.119762	inf	0	1	1	no
XLOC_000812	XLOC_000812	AC099796.1	chr1:54504667-54504770	Control_1_hr	Zn_1_hr	NOTEST	0	0	0	0	1	1	no
XLOC_000813	XLOC_000813	RP5-866L20.2	chr1:54524823-54524931	Control_1_hr	Zn_1_hr	OK	62.9966	53.2898	-0.241417	-0.226455	0.8161	1	no
XLOC_000814	XLOC_000814	HNRNPA1P63	chr1:54536795-54537758	Control_1_hr	Zn_1_hr	NOTEST	0	0.01176	inf	0	1	1	no
XLOC_000815	XLOC_000815	ACOT11	chr1:54542256-54639192	Control_1_hr	Zn_1_hr	OK	1.75094	1.74659	-0.0035887	-0.014607	0.9776	1	no
XLOC_000816	XLOC_000816	MROH7,MROH7-TTC4,TTC4	chr1:54641753-54742657	Control_1_hr	Zn_1_hr	OK	12.4255	13.5386	0.123769	0.503791	0.35375	1	no
XLOC_000817	XLOC_000817	RP11-67L3.2	chr1:54779711-54801267	Control_1_hr	Zn_1_hr	NOTEST	0	0	0	0	1	1	no
XLOC_000818	XLOC_000818	C1orf177	chr1:54806062-54842252	Control_1_hr	Zn_1_hr	NOTEST	0.0181929	0	#NAME?	0	1	1	no
XLOC_000819	XLOC_000819	RP11-67L3.4,RP11-67L3.5	chr1:54849632-54888850	Control_1_hr	Zn_1_hr	OK	0.0598998	0.487023	3.02337	0.274039	0.00515	0.461457	no
XLOC_000820	XLOC_000820	TMEM61	chr1:54980791-54992293	Control_1_hr	Zn_1_hr	NOTEST	0.0625042	0.100028	0.678386	0	1	1	no
XLOC_000821	XLOC_000821	BSND	chr1:54998932-55010883	Control_1_hr	Zn_1_hr	NOTEST	0	0	0	0	1	1	no
XLOC_000822	XLOC_000822	PCSK9	chr1:55039547-55064852	Control_1_hr	Zn_1_hr	OK	20.9391	22.6615	0.114041	0.750546	0.19435	1	no
XLOC_000823	XLOC_000823	RP11-101C11.1	chr1:55217860-55234177	Control_1_hr	Zn_1_hr	NOTEST	0.0411689	0	#NAME?	0	1	1	no
XLOC_000824	XLOC_000824	GYG1P3	chr1:55217860-55234177	Control_1_hr	Zn_1_hr	OK	0.40952	0.638043	0.639719	1.00029	0.08515	1	no
XLOC_000825	XLOC_000825	MIR4422	chr1:55217860-55234177	Control_1_hr	Zn_1_hr	NOTEST	0	0	0	0	1	1	no
XLOC_000826	XLOC_000826	GOT2P1	chr1:55367465-55368774	Control_1_hr	Zn_1_hr	NOTEST	0	0	0	0	1	1	no
XLOC_000827	XLOC_000827	RNU6-830P	chr1:55398513-55398620	Control_1_hr	Zn_1_hr	NOTEST	0	0	0	0	1	1	no
XLOC_000828	XLOC_000828	RP11-466L17.1	chr1:55581036-55735002	Control_1_hr	Zn_1_hr	NOTEST	0	0	0	0	1	1	no
XLOC_000829	XLOC_000829	RP11-90C4.1	chr1:55823806-55868248	Control_1_hr	Zn_1_hr	NOTEST	0	0	0	0	1	1	no
XLOC_000830	XLOC_000830	RP11-90C4.3	chr1:55945086-55950119	Control_1_hr	Zn_1_hr	NOTEST	0	0	0	0	1	1	no
XLOC_000831	XLOC_000831	RP1-158P9.1	chr1:56145720-56155224	Control_1_hr	Zn_1_hr	NOTEST	0	0	0	0	1	1	no
XLOC_000832	XLOC_000832	RP4-710M16.2	chr1:56414962-56415966	Control_1_hr	Zn_1_hr	NOTEST	0	0.0254608	inf	0	1	1	no
XLOC_000833	XLOC_000833	RPL21P23	chr1:56494746-56645301	Control_1_hr	Zn_1_hr	NOTEST	0	0	0	0	1	1	no
XLOC_000834	XLOC_000834	PRKAA2	chr1:56645321-56715335	Control_1_hr	Zn_1_hr	OK	2.64809	2.71298	0.0349269	0.214406	0.7048	1	no
XLOC_000835	XLOC_000835	C8A	chr1:56854805-56918221	Control_1_hr	Zn_1_hr	NOTEST	0	0	0	0	1	1	no
XLOC_000836	XLOC_000836	RP5-1103B4.3	chr1:56929209-58546802	Control_1_hr	Zn_1_hr	NOTEST	0.0307732	0	#NAME?	0	1	1	no
XLOC_000837	XLOC_000837	AL161740.1	chr1:56929209-58546802	Control_1_hr	Zn_1_hr	NOTEST	0	0	0	0	1	1	no
XLOC_000838	XLOC_000838	RP6-102O10.1	chr1:56929209-58546802	Control_1_hr	Zn_1_hr	NOTEST	0	0	0	0	1	1	no
XLOC_000839	XLOC_000839	AL137855.1	chr1:56929209-58546802	Control_1_hr	Zn_1_hr	NOTEST	0	0	0	0	1	1	no
XLOC_000840	XLOC_000840	DAB1-AS1	chr1:56929209-58546802	Control_1_hr	Zn_1_hr	NOTEST	0	0	0	0	1	1	no
XLOC_000841	XLOC_000841	RP11-393I23.4	chr1:56929209-58546802	Control_1_hr	Zn_1_hr	NOTEST	0	0	0	0	1	1	no
XLOC_000842	XLOC_000842	RP11-393I23.3	chr1:56929209-58546802	Control_1_hr	Zn_1_hr	NOTEST	0	0	0	0	1	1	no
XLOC_000843	XLOC_000843	LINC01135	chr1:58785159-58899594	Control_1_hr	Zn_1_hr	NOTEST	0	0	0	0	1	1	no
XLOC_000844	XLOC_000844	PHBP3	chr1:58999675-59000494	Control_1_hr	Zn_1_hr	OK	3.35928	3.46934	0.0465092	0.173324	0.7722	1	no
XLOC_000845	XLOC_000845	LINC01358	chr1:59020386-59044614	Control_1_hr	Zn_1_hr	NOTEST	0.0376642	0.02657	-0.503393	0	1	1	no
XLOC_000846	XLOC_000846	RP11-145M4.3	chr1:59054396-59088195	Control_1_hr	Zn_1_hr	NOTEST	0	0	0	0	1	1	no
XLOC_000847	XLOC_000847	RP11-470E16.2	chr1:59131935-59240555	Control_1_hr	Zn_1_hr	NOTEST	0	0	0	0	1	1	no
XLOC_000848	XLOC_000848	FGGY	chr1:59296637-59789182	Control_1_hr	Zn_1_hr	OK	3.28286	2.7474	-0.256885	-0.413216	0.3822	1	no
XLOC_000849	XLOC_000849	RP4-782L23.1	chr1:59296637-59789182	Control_1_hr	Zn_1_hr	NOTEST	0.0359542	0	#NAME?	0	1	1	no
XLOC_000850	XLOC_000850	HOOK1	chr1:59814785-59876378	Control_1_hr	Zn_1_hr	OK	1.45251	1.80856	0.316286	0.193766	0.5786	1	no
XLOC_000851	XLOC_000851	PGBD4P8	chr1:60097414-60097976	Control_1_hr	Zn_1_hr	NOTEST	0	0	0	0	1	1	no
XLOC_000852	XLOC_000852	RP11-575B7.3	chr1:60114874-60149679	Control_1_hr	Zn_1_hr	NOTEST	0	0	0	0	1	1	no
XLOC_000853	XLOC_000853	NFIA	chr1:60865258-61462793	Control_1_hr	Zn_1_hr	OK	4.51299	5.0359	0.158166	0.560306	0.3132	1	no
XLOC_000854	XLOC_000854	AL355795.1	chr1:60865258-61462793	Control_1_hr	Zn_1_hr	NOTEST	0	0	0	0	1	1	no
XLOC_000855	XLOC_000855	RP4-802A10.1	chr1:60865258-61462793	Control_1_hr	Zn_1_hr	NOTEST	0.19519	0.198088	0.0212642	0	1	1	no
XLOC_000856	XLOC_000856	AC099791.1	chr1:61629030-61629121	Control_1_hr	Zn_1_hr	NOTEST	0	0	0	0	1	1	no
XLOC_000857	XLOC_000857	RP11-430G17.1	chr1:61654193-61654908	Control_1_hr	Zn_1_hr	NOTEST	0.0487206	0.153955	1.6599	0	1	1	no
XLOC_000858	XLOC_000858	INADL	chr1:61742476-62163920	Control_1_hr	Zn_1_hr	OK	5.89237	6.10394	0.0508918	0.110239	0.8245	1	no
XLOC_000859	XLOC_000859	RNU6-414P	chr1:61742476-62163920	Control_1_hr	Zn_1_hr	NOTEST	0	0	0	0	1	1	no
XLOC_000860	XLOC_000860	RNU6-1177P	chr1:61742476-62163920	Control_1_hr	Zn_1_hr	NOTEST	0	0	0	0	1	1	no
XLOC_000861	XLOC_000861	LAMTOR5P1	chr1:61742476-62163920	Control_1_hr	Zn_1_hr	OK	13.9203	17.2069	0.305798	0.37655	0.5136	1	no
XLOC_000862	XLOC_000862	RN7SL180P	chr1:61742476-62163920	Control_1_hr	Zn_1_hr	NOTEST	0	0	0	0	1	1	no
XLOC_000863	XLOC_000863	MIR3116-1	chr1:61742476-62163920	Control_1_hr	Zn_1_hr	NOTEST	0	0	0	0	1	1	no
XLOC_000864	XLOC_000864	PIGPP2	chr1:62189130-62189953	Control_1_hr	Zn_1_hr	NOTEST	0	0	0	0	1	1	no
XLOC_000865	XLOC_000865	RPS15AP7	chr1:62190521-62190926	Control_1_hr	Zn_1_hr	NOTEST	0	0	0	0	1	1	no
XLOC_000866	XLOC_000866	L1TD1,Y_RNA	chr1:62194830-62212328	Control_1_hr	Zn_1_hr	NOTEST	0.00346922	0	#NAME?	0	1	1	no
XLOC_000867	XLOC_000867	USP1	chr1:62436296-62451804	Control_1_hr	Zn_1_hr	OK	21.1456	19.7431	-0.0990096	-0.643549	0.25845	1	no
XLOC_000868	XLOC_000868	RP11-293K19.1	chr1:62454727-62688368	Control_1_hr	Zn_1_hr	NOTEST	0	0	0	0	1	1	no
XLOC_000869	XLOC_000869	ANGPTL3	chr1:62454727-62688368	Control_1_hr	Zn_1_hr	NOTEST	0.0893708	0.0122287	-2.86954	0	1	1	no
XLOC_000870	XLOC_000870	RP5-849H19.3	chr1:62454727-62688368	Control_1_hr	Zn_1_hr	NOTEST	0.0466991	0	#NAME?	0	1	1	no
XLOC_000871	XLOC_000871	RP11-230B22.1	chr1:62688481-62710694	Control_1_hr	Zn_1_hr	NOTEST	0.0625769	0.0175364	-1.83527	0	1	1	no
XLOC_000872	XLOC_000872	ATG4C	chr1:62784134-62865513	Control_1_hr	Zn_1_hr	OK	7.40382	7.06218	-0.0681568	-0.230453	0.66175	1	no
XLOC_000873	XLOC_000873	RP4-771M4.3	chr1:62896008-62901639	Control_1_hr	Zn_1_hr	NOTEST	0.0481271	0	#NAME?	0	1	1	no
XLOC_000874	XLOC_000874	RP4-771M4.2	chr1:62905179-62905482	Control_1_hr	Zn_1_hr	NOTEST	0	0.075264	inf	0	1	1	no
XLOC_000875	XLOC_000875	RP11-5P4.2	chr1:63024206-63025658	Control_1_hr	Zn_1_hr	NOTEST	0	0	0	0	1	1	no
XLOC_000876	XLOC_000876	RP11-335E6.2	chr1:63139249-63163153	Control_1_hr	Zn_1_hr	NOTEST	0	0	0	0	1	1	no
XLOC_000877	XLOC_000877	RP11-335E6.3	chr1:63189988-63317231	Control_1_hr	Zn_1_hr	NOTEST	0	0	0	0	1	1	no
XLOC_000878	XLOC_000878	AL138935.1	chr1:63189988-63317231	Control_1_hr	Zn_1_hr	NOTEST	0.0308735	0	#NAME?	0	1	1	no
XLOC_000879	XLOC_000879	FOXD3	chr1:63320883-63325126	Control_1_hr	Zn_1_hr	OK	1.12554	0.898176	-0.325547	-1.07217	0.0573	1	no
XLOC_000880	XLOC_000880	Y_RNA	chr1:63338262-63338372	Control_1_hr	Zn_1_hr	NOTEST	0	0	0	0	1	1	no
XLOC_000881	XLOC_000881	ALG6	chr1:63367589-63438562	Control_1_hr	Zn_1_hr	OK	8.58144	8.1704	-0.0708134	-0.381381	0.49935	1	no
XLOC_000882	XLOC_000882	DLEU2L,EFCAB7	chr1:63440769-63660245	Control_1_hr	Zn_1_hr	OK	3.31303	3.32049	0.00324175	0.0045705	0.99245	1	no
XLOC_000883	XLOC_000883	PGM1	chr1:63440769-63660245	Control_1_hr	Zn_1_hr	OK	26.427	27.1176	0.0372206	0.199462	0.7305	1	no
XLOC_000884	XLOC_000884	RN7SL130P	chr1:63440769-63660245	Control_1_hr	Zn_1_hr	NOTEST	0.499487	0.0673678	-2.89032	0	1	1	no
XLOC_000885	XLOC_000885	ROR1	chr1:63774021-64181498	Control_1_hr	Zn_1_hr	OK	10.9882	11.8606	0.110213	0.561469	0.3206	1	no
XLOC_000886	XLOC_000886	UBE2U	chr1:64203626-64267368	Control_1_hr	Zn_1_hr	NOTEST	0	0	0	0	1	1	no
XLOC_000887	XLOC_000887	CACHD1	chr1:64470791-64693058	Control_1_hr	Zn_1_hr	OK	0.877515	0.846707	-0.0515621	-0.177248	0.7153	1	no
XLOC_000888	XLOC_000888	MIR4794	chr1:64470791-64693058	Control_1_hr	Zn_1_hr	NOTEST	0	0	0	0	1	1	no
XLOC_000889	XLOC_000889	RAVER2	chr1:64745094-64966504	Control_1_hr	Zn_1_hr	OK	4.5604	4.52094	-0.0125381	-0.0195376	0.97345	1	no
XLOC_000890	XLOC_000890	RP11-182I10.1	chr1:64745094-64966504	Control_1_hr	Zn_1_hr	NOTEST	0	0	0	0	1	1	no
XLOC_000891	XLOC_000891	RP11-182I10.2	chr1:64745094-64966504	Control_1_hr	Zn_1_hr	NOTEST	0.0621178	0	#NAME?	0	1	1	no
XLOC_000892	XLOC_000892	AK4	chr1:65147548-65232145	Control_1_hr	Zn_1_hr	OK	2.59798	3.14474	0.275546	0.86832	0.11505	1	no
XLOC_000893	XLOC_000893	RP4-700A9.1	chr1:65147548-65232145	Control_1_hr	Zn_1_hr	NOTEST	0	0	0	0	1	1	no
XLOC_000894	XLOC_000894	DNAJC6,RNU2-15P	chr1:65248218-65416006	Control_1_hr	Zn_1_hr	OK	2.56488	3.0356	0.243093	0.751757	0.1235	1	no
XLOC_000895	XLOC_000895	LEPR,LEPROT	chr1:65420586-65641559	Control_1_hr	Zn_1_hr	OK	42.8249	41.5069	-0.0450969	-0.110787	0.84895	1	no
XLOC_000896	XLOC_000896	RP4-630A11.3	chr1:65420586-65641559	Control_1_hr	Zn_1_hr	NOTEST	0	0.0572969	inf	0	1	1	no
XLOC_000897	XLOC_000897	PDE4B	chr1:65792513-66374579	Control_1_hr	Zn_1_hr	OK	10.8757	11.1162	0.0315501	0.0824835	0.8352	1	no
XLOC_000898	XLOC_000898	SGIP1	chr1:66533382-66748299	Control_1_hr	Zn_1_hr	NOTEST	0	0.0041256	inf	0	1	1	no
XLOC_000899	XLOC_000899	AL139147.1	chr1:66533382-66748299	Control_1_hr	Zn_1_hr	NOTEST	0	0	0	0	1	1	no
XLOC_000900	XLOC_000900	TCTEX1D1	chr1:66752458-66778787	Control_1_hr	Zn_1_hr	NOTEST	0	0	0	0	1	1	no
XLOC_000901	XLOC_000901	RP11-342H21.2	chr1:66812884-66924887	Control_1_hr	Zn_1_hr	NOTEST	0	0	0	0	1	1	no
XLOC_000902	XLOC_000902	MIER1	chr1:66924894-66988619	Control_1_hr	Zn_1_hr	OK	9.30911	9.21585	-0.0145259	-0.0802685	0.89205	1	no
XLOC_000903	XLOC_000903	IL23R	chr1:67092164-67259979	Control_1_hr	Zn_1_hr	NOTEST	0.0138018	0.00290454	-2.24848	0	1	1	no
XLOC_000904	XLOC_000904	RNU6-586P	chr1:67092164-67259979	Control_1_hr	Zn_1_hr	NOTEST	0	0	0	0	1	1	no
XLOC_000905	XLOC_000905	RP11-131O15.2	chr1:67278051-67278779	Control_1_hr	Zn_1_hr	NOTEST	0.106191	0.0595483	-0.834532	0	1	1	no
XLOC_000906	XLOC_000906	IL12RB2	chr1:67307363-67396900	Control_1_hr	Zn_1_hr	NOTEST	0.0835341	0.0272372	-1.61679	0	1	1	no
XLOC_000907	XLOC_000907	RNU6-387P	chr1:67407809-67430415	Control_1_hr	Zn_1_hr	NOTEST	0	8.33618	inf	0	1	1	no
XLOC_000908	XLOC_000908	RP4-763G1.2	chr1:67529629-67532329	Control_1_hr	Zn_1_hr	NOTEST	0	0	0	0	1	1	no
XLOC_000909	XLOC_000909	RNU6-1031P	chr1:67541126-67541233	Control_1_hr	Zn_1_hr	NOTEST	0	0	0	0	1	1	no
XLOC_000910	XLOC_000910	RP11-393N21.1	chr1:67561072-67561446	Control_1_hr	Zn_1_hr	NOTEST	0	0	0	0	1	1	no
XLOC_000911	XLOC_000911	GADD45A	chr1:67685060-67688338	Control_1_hr	Zn_1_hr	OK	29.4453	31.5899	0.101426	0.634009	0.2703	1	no
XLOC_000912	XLOC_000912	GNG12-AS1	chr1:67701465-68233120	Control_1_hr	Zn_1_hr	NOTEST	0.0292448	0.0563216	0.945507	0	1	1	no
XLOC_000913	XLOC_000913	RP4-609E1.2	chr1:67701465-68233120	Control_1_hr	Zn_1_hr	NOTEST	0.0260366	0.0434921	0.740209	0	1	1	no
XLOC_000914	XLOC_000914	AL157407.1	chr1:67701465-68233120	Control_1_hr	Zn_1_hr	NOTEST	0	0	0	0	1	1	no
XLOC_000915	XLOC_000915	COX6B1P7	chr1:68282387-68282622	Control_1_hr	Zn_1_hr	NOTEST	0	0	0	0	1	1	no
XLOC_000916	XLOC_000916	RP4-694A7.2	chr1:68474151-68538627	Control_1_hr	Zn_1_hr	OK	0.188442	0.371797	0.980396	0.416225	0.62505	1	no
XLOC_000917	XLOC_000917	DEPDC1-AS1	chr1:68474151-68538627	Control_1_hr	Zn_1_hr	OK	0.3045	0.37333	0.294006	0.159038	0.78975	1	no
XLOC_000918	XLOC_000918	RP11-424D14.1	chr1:69055897-69185003	Control_1_hr	Zn_1_hr	NOTEST	0	0	0	0	1	1	no
XLOC_000919	XLOC_000919	RP3-380B4.1	chr1:69433254-69435409	Control_1_hr	Zn_1_hr	NOTEST	0	0	0	0	1	1	no
XLOC_000920	XLOC_000920	LRRC7	chr1:69568397-70205620	Control_1_hr	Zn_1_hr	NOTEST	0.209071	0.0398873	-2.38999	0	1	1	no
XLOC_000921	XLOC_000921	RN7SL538P	chr1:69568397-70205620	Control_1_hr	Zn_1_hr	NOTEST	0	0	0	0	1	1	no
XLOC_000922	XLOC_000922	PIN1P1	chr1:69568397-70205620	Control_1_hr	Zn_1_hr	OK	0.76422	0.564267	-0.437608	-0.37059	0.5256	1	no
XLOC_000923	XLOC_000923	SRSF11	chr1:70205681-70253052	Control_1_hr	Zn_1_hr	OK	59.4292	53.3501	-0.155681	-0.703178	0.2128	1	no
XLOC_000924	XLOC_000924	HHLA3	chr1:70354804-70385339	Control_1_hr	Zn_1_hr	OK	4.16432	4.41468	0.0842302	0.287215	0.58825	1	no
XLOC_000925	XLOC_000925	CTH	chr1:70411217-70439851	Control_1_hr	Zn_1_hr	OK	1.18559	1.34922	0.18652	0.434909	0.41675	1	no
XLOC_000926	XLOC_000926	Metazoa_SRP	chr1:70411217-70439851	Control_1_hr	Zn_1_hr	NOTEST	0	0	0	0	1	1	no
XLOC_000927	XLOC_000927	RP11-42O15.3	chr1:70445070-70445536	Control_1_hr	Zn_1_hr	NOTEST	0.135692	0.151997	0.163701	0	1	1	no
XLOC_000928	XLOC_000928	RP11-42O15.2	chr1:70530525-70531492	Control_1_hr	Zn_1_hr	OK	0.911208	1.03372	0.181996	0.399302	0.4859	1	no
XLOC_000929	XLOC_000929	RP5-952N6.1	chr1:70706452-70786468	Control_1_hr	Zn_1_hr	NOTEST	0	0	0	0	1	1	no
XLOC_000930	XLOC_000930	RP3-333A15.1	chr1:70852352-71047808	Control_1_hr	Zn_1_hr	NOTEST	0	0	0	0	1	1	no
XLOC_000931	XLOC_000931	ZRANB2-AS1	chr1:71048854-71081297	Control_1_hr	Zn_1_hr	NOTEST	0.0490689	0.0203335	-1.27095	0	1	1	no
XLOC_000932	XLOC_000932	ZRANB2-AS2	chr1:71081323-72282734	Control_1_hr	Zn_1_hr	NOTEST	0.029231	0.0133908	-1.12626	0	1	1	no
XLOC_000933	XLOC_000933	RP11-386O9.2	chr1:71081323-72282734	Control_1_hr	Zn_1_hr	NOTEST	0	0	0	0	1	1	no
XLOC_000934	XLOC_000934	RP11-82L20.1	chr1:71081323-72282734	Control_1_hr	Zn_1_hr	NOTEST	0	0	0	0	1	1	no
XLOC_000935	XLOC_000935	RP11-175G14.2	chr1:71081323-72282734	Control_1_hr	Zn_1_hr	NOTEST	0	0	0	0	1	1	no
XLOC_000936	XLOC_000936	GDI2P2	chr1:71081323-72282734	Control_1_hr	Zn_1_hr	OK	22.4491	21.9326	-0.0335794	-0.213916	0.7098	1	no
XLOC_000937	XLOC_000937	RPL31P12	chr1:72301471-72301829	Control_1_hr	Zn_1_hr	NOTEST	0.0721653	0	#NAME?	0	1	1	no
XLOC_000938	XLOC_000938	RP11-262K1.1	chr1:72748920-72899140	Control_1_hr	Zn_1_hr	NOTEST	0	0.0224587	inf	0	1	1	no
XLOC_000939	XLOC_000939	KRT8P21	chr1:73104791-73106282	Control_1_hr	Zn_1_hr	NOTEST	0.0342821	0.0571305	0.736804	0	1	1	no
XLOC_000940	XLOC_000940	LINC01360	chr1:73306169-73355251	Control_1_hr	Zn_1_hr	NOTEST	0	0.00387485	inf	0	1	1	no
XLOC_000941	XLOC_000941	RP4-788P17.1	chr1:73635215-73715214	Control_1_hr	Zn_1_hr	NOTEST	0	0	0	0	1	1	no
XLOC_000942	XLOC_000942	RNU4ATAC8P	chr1:73883713-73883822	Control_1_hr	Zn_1_hr	NOTEST	0	0	0	0	1	1	no
XLOC_000943	XLOC_000943	FPGT,FPGT-TNNI3K,TNNI3K	chr1:74198211-74544428	Control_1_hr	Zn_1_hr	OK	6.86163	7.13577	0.0565175	0.199327	0.69965	1	no
XLOC_000944	XLOC_000944	RP4-650F12.2	chr1:74198211-74544428	Control_1_hr	Zn_1_hr	NOTEST	0	0	0	0	1	1	no
XLOC_000945	XLOC_000945	ERICH3-AS1	chr1:74568110-74673738	Control_1_hr	Zn_1_hr	NOTEST	0	0	0	0	1	1	no
XLOC_000946	XLOC_000946	TYW3	chr1:74705481-74766678	Control_1_hr	Zn_1_hr	OK	11.4431	11.1339	-0.0395162	-0.0901659	0.86375	1	no
XLOC_000947	XLOC_000947	RP11-93N20.1	chr1:74963313-74965118	Control_1_hr	Zn_1_hr	NOTEST	0	0	0	0	1	1	no
XLOC_000948	XLOC_000948	LHX8	chr1:75127829-75161533	Control_1_hr	Zn_1_hr	OK	1.92684	1.92368	-0.00237344	-0.0101101	0.9858	1	no
XLOC_000949	XLOC_000949	AC118550.1	chr1:75182615-75182709	Control_1_hr	Zn_1_hr	NOTEST	0	0	0	0	1	1	no
XLOC_000950	XLOC_000950	RNU6-622P	chr1:75183044-75183147	Control_1_hr	Zn_1_hr	NOTEST	0	0	0	0	1	1	no
XLOC_000951	XLOC_000951	RP11-87O11.1	chr1:75202130-75611116	Control_1_hr	Zn_1_hr	NOTEST	0	0	0	0	1	1	no
XLOC_000952	XLOC_000952	RP4-595K12.1	chr1:75202130-75611116	Control_1_hr	Zn_1_hr	NOTEST	0.0463811	0.0298941	-0.633674	0	1	1	no
XLOC_000953	XLOC_000953	ACADM,RABGGTB,SNORD45A,SNORD45B,SNORD45C	chr1:75724346-75795079	Control_1_hr	Zn_1_hr	OK	81.1556	79.3535	-0.0323955	-0.171539	0.7587	1	no
XLOC_000954	XLOC_000954	MSH4	chr1:75796881-75913238	Control_1_hr	Zn_1_hr	NOTEST	0.0224126	0.00593148	-1.91785	0	1	1	no
XLOC_000955	XLOC_000955	AL445464.1	chr1:75796881-75913238	Control_1_hr	Zn_1_hr	NOTEST	0	0	0	0	1	1	no
XLOC_000956	XLOC_000956	RP11-550H2.1	chr1:76011323-76019356	Control_1_hr	Zn_1_hr	NOTEST	0	0	0	0	1	1	no
XLOC_000957	XLOC_000957	RP11-550H2.2	chr1:76041690-76066228	Control_1_hr	Zn_1_hr	NOTEST	0	0	0	0	1	1	no
XLOC_000958	XLOC_000958	ST6GALNAC3	chr1:76074718-76634601	Control_1_hr	Zn_1_hr	OK	1.55429	1.34913	-0.204225	-0.325203	0.56855	1	no
XLOC_000959	XLOC_000959	RP5-1102E8.3	chr1:76636876-76637339	Control_1_hr	Zn_1_hr	NOTEST	0	0.0292347	inf	0	1	1	no
XLOC_000960	XLOC_000960	TPI1P1	chr1:76699788-76700538	Control_1_hr	Zn_1_hr	OK	323.677	319.647	-0.0180778	-0.121313	0.83175	1	no
XLOC_000961	XLOC_000961	AC104458.1	chr1:76718139-76718241	Control_1_hr	Zn_1_hr	NOTEST	0	0	0	0	1	1	no
XLOC_000962	XLOC_000962	RNU6-161P	chr1:76753134-76753240	Control_1_hr	Zn_1_hr	NOTEST	0	0	0	0	1	1	no
XLOC_000963	XLOC_000963	ST6GALNAC5	chr1:76867440-77065711	Control_1_hr	Zn_1_hr	NOTEST	0.00356451	0.0261449	2.87476	0	1	1	no
XLOC_000964	XLOC_000964	AC096951.1	chr1:76867440-77065711	Control_1_hr	Zn_1_hr	NOTEST	0	0	0	0	1	1	no
XLOC_000965	XLOC_000965	MIR7156	chr1:76867440-77065711	Control_1_hr	Zn_1_hr	NOTEST	0	0	0	0	1	1	no
XLOC_000966	XLOC_000966	RP4-564M11.2	chr1:77067919-77078482	Control_1_hr	Zn_1_hr	NOTEST	0	0	0	0	1	1	no
XLOC_000967	XLOC_000967	RP4-706A16.3	chr1:77088989-77219430	Control_1_hr	Zn_1_hr	OK	120.033	127.198	0.0836407	0.391029	0.48975	1	no
XLOC_000968	XLOC_000968	RP11-363H12.1	chr1:77088989-77219430	Control_1_hr	Zn_1_hr	OK	4.47201	4.42275	-0.0159797	-0.0147726	0.9803	1	no
XLOC_000969	XLOC_000969	AK5	chr1:77282050-77559969	Control_1_hr	Zn_1_hr	OK	10.2217	10.5435	0.0447145	0.130055	0.81175	1	no
XLOC_000970	XLOC_000970	RNU7-8P	chr1:77282050-77559969	Control_1_hr	Zn_1_hr	NOTEST	0	0	0	0	1	1	no
XLOC_000971	XLOC_000971	RNA5SP20	chr1:77562415-77683419	Control_1_hr	Zn_1_hr	NOTEST	0	0	0	0	1	1	no
XLOC_000972	XLOC_000972	RN7SL370P	chr1:77562415-77683419	Control_1_hr	Zn_1_hr	NOTEST	0.106467	0	#NAME?	0	1	1	no
XLOC_000973	XLOC_000973	FAM73A,RNA5SP21	chr1:77779623-77879539	Control_1_hr	Zn_1_hr	OK	5.13515	5.39551	0.0713531	0.231778	0.63015	1	no
XLOC_000974	XLOC_000974	NSRP1P1	chr1:77779623-77879539	Control_1_hr	Zn_1_hr	OK	1.21076	1.17811	-0.0394358	-0.0428377	0.943	1	no
XLOC_000975	XLOC_000975	HSPE1P25	chr1:77779623-77879539	Control_1_hr	Zn_1_hr	NOTEST	0	0	0	0	1	1	no
XLOC_000976	XLOC_000976	NEXN	chr1:77881347-77943895	Control_1_hr	Zn_1_hr	OK	2.85341	2.66592	-0.0980522	-0.423904	0.44155	1	no
XLOC_000977	XLOC_000977	DNAJB4,GIPC2	chr1:77979174-78138449	Control_1_hr	Zn_1_hr	OK	13.853	16.5373	0.255522	1.07318	0.0583	1	no
XLOC_000978	XLOC_000978	RP11-386I14.3	chr1:77979174-78138449	Control_1_hr	Zn_1_hr	OK	8.69668	8.5635	-0.0222634	-0.0392271	0.94705	1	no
XLOC_000979	XLOC_000979	MGC27382	chr1:78229598-78539749	Control_1_hr	Zn_1_hr	NOTEST	0	0.00679143	inf	0	1	1	no
XLOC_000980	XLOC_000980	PTGFR	chr1:78229598-78539749	Control_1_hr	Zn_1_hr	NOTEST	0	0.0054834	inf	0	1	1	no
XLOC_000981	XLOC_000981	IFI44L	chr1:78619921-78646145	Control_1_hr	Zn_1_hr	NOTEST	0.0167747	0	#NAME?	0	1	1	no
XLOC_000982	XLOC_000982	IFI44	chr1:78649795-78664078	Control_1_hr	Zn_1_hr	NOTEST	0.153245	0.213738	0.480005	0	1	1	no
XLOC_000983	XLOC_000983	RP4-641G12.3	chr1:78666271-78666695	Control_1_hr	Zn_1_hr	NOTEST	0	0	0	0	1	1	no
XLOC_000984	XLOC_000984	AC104837.1	chr1:78687059-78687160	Control_1_hr	Zn_1_hr	NOTEST	0	0	0	0	1	1	no
XLOC_000985	XLOC_000985	RP4-641G12.4	chr1:78749072-78750659	Control_1_hr	Zn_1_hr	OK	3.52206	3.13232	-0.169186	-0.932635	0.103	1	no
XLOC_000986	XLOC_000986	RP4-726F1.1	chr1:79323768-79324863	Control_1_hr	Zn_1_hr	NOTEST	0	0	0	0	1	1	no
XLOC_000987	XLOC_000987	ADH5P2	chr1:79521079-79522203	Control_1_hr	Zn_1_hr	NOTEST	0.245716	0.210151	-0.225563	0	1	1	no
XLOC_000988	XLOC_000988	RP11-339A11.2	chr1:80114942-80116918	Control_1_hr	Zn_1_hr	NOTEST	0	0.00510347	inf	0	1	1	no
XLOC_000989	XLOC_000989	RP11-339A11.3	chr1:80124003-80124361	Control_1_hr	Zn_1_hr	NOTEST	0	0	0	0	1	1	no
XLOC_000990	XLOC_000990	HMGB1P18	chr1:80283351-80283970	Control_1_hr	Zn_1_hr	NOTEST	0	0	0	0	1	1	no
XLOC_000991	XLOC_000991	RP11-115A15.2	chr1:80495902-80496233	Control_1_hr	Zn_1_hr	OK	0.628323	0.443434	-0.502786	-0.302765	0.68535	1	no
XLOC_000992	XLOC_000992	RP5-887A10.1	chr1:80534977-80646788	Control_1_hr	Zn_1_hr	NOTEST	0	0	0	0	1	1	no
XLOC_000993	XLOC_000993	MTND2P30	chr1:81080789-81081171	Control_1_hr	Zn_1_hr	NOTEST	0	0	0	0	1	1	no
XLOC_000994	XLOC_000994	RP3-445O10.1	chr1:81208567-81209210	Control_1_hr	Zn_1_hr	NOTEST	0.056265	0.0175591	-1.68002	0	1	1	no
XLOC_000995	XLOC_000995	RN7SKP247	chr1:81251788-81252096	Control_1_hr	Zn_1_hr	NOTEST	0	0	0	0	1	1	no
XLOC_000996	XLOC_000996	AC113949.1,LPHN2	chr1:81306159-81992436	Control_1_hr	Zn_1_hr	OK	8.08213	8.39924	0.0555235	0.153397	0.75975	1	no
XLOC_000997	XLOC_000997	HNRNPA3P14	chr1:81306159-81992436	Control_1_hr	Zn_1_hr	NOTEST	0.0263061	0.00947796	-1.47275	0	1	1	no
XLOC_000998	XLOC_000998	RP5-837I24.1	chr1:81306159-81992436	Control_1_hr	Zn_1_hr	OK	0.394509	0.38257	-0.0443344	-0.0323697	0.95405	1	no
XLOC_000999	XLOC_000999	RP5-837I24.6	chr1:81306159-81992436	Control_1_hr	Zn_1_hr	NOTEST	0	0	0	0	1	1	no
XLOC_001000	XLOC_001000	ST13P20	chr1:81306159-81992436	Control_1_hr	Zn_1_hr	NOTEST	0	0	0	0	1	1	no
XLOC_001001	XLOC_001001	AL357973.1	chr1:82660029-82660119	Control_1_hr	Zn_1_hr	NOTEST	0	0	0	0	1	1	no
XLOC_001002	XLOC_001002	LINC01362	chr1:82903182-83166815	Control_1_hr	Zn_1_hr	NOTEST	0	0	0	0	1	1	no
XLOC_001003	XLOC_001003	RP11-413G15.1	chr1:83446052-83454771	Control_1_hr	Zn_1_hr	NOTEST	0	0	0	0	1	1	no
XLOC_001004	XLOC_001004	RP5-836J3.1	chr1:83575775-83861023	Control_1_hr	Zn_1_hr	NOTEST	0	0	0	0	1	1	no
XLOC_001005	XLOC_001005	PRKACB	chr1:84078061-84238498	Control_1_hr	Zn_1_hr	OK	9.77018	8.9891	-0.120208	-0.492657	0.37035	1	no
XLOC_001006	XLOC_001006	RP11-486G15.1	chr1:84078061-84238498	Control_1_hr	Zn_1_hr	OK	1.21371	0.963079	-0.333694	-0.174362	0.776	1	no
XLOC_001007	XLOC_001007	AL450063.1	chr1:84078061-84238498	Control_1_hr	Zn_1_hr	NOTEST	0	0	0	0	1	1	no
XLOC_001008	XLOC_001008	RP11-82H13.2	chr1:84244333-84244577	Control_1_hr	Zn_1_hr	OK	3.51593	2.66426	-0.400172	-0.425023	0.41405	1	no
XLOC_001009	XLOC_001009	SNORA2	chr1:84277320-84277457	Control_1_hr	Zn_1_hr	NOTEST	0	0	0	0	1	1	no
XLOC_001010	XLOC_001010	RP11-376N17.4,SAMD13	chr1:84298365-84397831	Control_1_hr	Zn_1_hr	OK	0.809957	0.504833	-0.682039	-0.702323	0.03685	1	no
XLOC_001011	XLOC_001011	DNASE2B	chr1:84398531-84415018	Control_1_hr	Zn_1_hr	NOTEST	0	0	0	0	1	1	no
XLOC_001012	XLOC_001012	RPF1	chr1:84479258-84497790	Control_1_hr	Zn_1_hr	OK	25.3253	24.825	-0.0287858	-0.178504	0.75335	1	no
XLOC_001013	XLOC_001013	SPATA1	chr1:84498324-84574480	Control_1_hr	Zn_1_hr	OK	0.63913	0.384919	-0.731556	-0.209918	0.4461	1	no
XLOC_001014	XLOC_001014	WDR63	chr1:84999146-85133138	Control_1_hr	Zn_1_hr	NOTEST	0.230839	0.296929	0.36323	0	1	1	no
XLOC_001015	XLOC_001015	MIR4423	chr1:85133793-85133873	Control_1_hr	Zn_1_hr	NOTEST	0	0	0	0	1	1	no
XLOC_001016	XLOC_001016	Y_RNA	chr1:85264295-85264402	Control_1_hr	Zn_1_hr	NOTEST	0	0	0	0	1	1	no
XLOC_001017	XLOC_001017	RP11-131L23.1	chr1:85266247-85578363	Control_1_hr	Zn_1_hr	NOTEST	0.0147702	0.0233184	0.658778	0	1	1	no
XLOC_001018	XLOC_001018	AL590113.1	chr1:85266247-85578363	Control_1_hr	Zn_1_hr	NOTEST	0	0	0	0	1	1	no
XLOC_001019	XLOC_001019	RP11-131L23.2	chr1:85266247-85578363	Control_1_hr	Zn_1_hr	NOTEST	0.239174	0.0452349	-2.40255	0	1	1	no
XLOC_001020	XLOC_001020	CYR61	chr1:85580760-85583962	Control_1_hr	Zn_1_hr	OK	41.4274	66.4631	0.681969	4.08748	5e-05	0.0116106	yes
XLOC_001021	XLOC_001021	SNORD81	chr1:85592279-85592356	Control_1_hr	Zn_1_hr	NOTEST	0	0	0	0	1	1	no
XLOC_001022	XLOC_001022	RP11-290M5.2	chr1:85599130-85600734	Control_1_hr	Zn_1_hr	NOTEST	0.156496	0	#NAME?	0	1	1	no
XLOC_001023	XLOC_001023	RP4-682E18.1	chr1:85729232-86156943	Control_1_hr	Zn_1_hr	NOTEST	0	0	0	0	1	1	no
XLOC_001024	XLOC_001024	CLCA2	chr1:86424085-86456558	Control_1_hr	Zn_1_hr	NOTEST	0	0.00434423	inf	0	1	1	no
XLOC_001025	XLOC_001025	CLCA1	chr1:86468367-86500289	Control_1_hr	Zn_1_hr	NOTEST	0	0	0	0	1	1	no
XLOC_001026	XLOC_001026	CLCA4	chr1:86547077-86693203	Control_1_hr	Zn_1_hr	NOTEST	0	0	0	0	1	1	no
XLOC_001027	XLOC_001027	CLCA3P	chr1:86547077-86693203	Control_1_hr	Zn_1_hr	NOTEST	0	0	0	0	1	1	no
XLOC_001028	XLOC_001028	SH3GLB1	chr1:86704569-86748184	Control_1_hr	Zn_1_hr	OK	26.3008	24.676	-0.0919982	-0.426319	0.45615	1	no
XLOC_001029	XLOC_001029	RP4-612B15.2	chr1:86784912-86785467	Control_1_hr	Zn_1_hr	NOTEST	0.305813	0.28988	-0.0771895	0	1	1	no
XLOC_001030	XLOC_001030	HS2ST1,LINC01140,RP5-1052I5.2	chr1:86914647-87169204	Control_1_hr	Zn_1_hr	OK	16.4804	16.9789	0.0429955	0.0993626	0.85965	1	no
XLOC_001031	XLOC_001031	AL121989.1	chr1:86914647-87169204	Control_1_hr	Zn_1_hr	NOTEST	0	0	0	0	1	1	no
XLOC_001032	XLOC_001032	RP11-384B12.3	chr1:86914647-87169204	Control_1_hr	Zn_1_hr	OK	8.0936	8.83471	0.126402	0.22209	0.69825	1	no
XLOC_001033	XLOC_001033	AL139139.1	chr1:86914647-87169204	Control_1_hr	Zn_1_hr	NOTEST	0	0	0	0	1	1	no
XLOC_001034	XLOC_001034	LMO4	chr1:87328467-87348923	Control_1_hr	Zn_1_hr	OK	15.1058	15.341	0.0222849	0.081966	0.88575	1	no
XLOC_001035	XLOC_001035	CTA-21C21.1	chr1:88313152-88313302	Control_1_hr	Zn_1_hr	NOTEST	0	0	0	0	1	1	no
XLOC_001036	XLOC_001036	uc_338	chr1:88519999-88520170	Control_1_hr	Zn_1_hr	NOTEST	0	0	0	0	1	1	no
XLOC_001037	XLOC_001037	RPL36AP10	chr1:88537512-88836255	Control_1_hr	Zn_1_hr	NOTEST	0	0	0	0	1	1	no
XLOC_001038	XLOC_001038	PKN2,TCEB1P19	chr1:88537512-88836255	Control_1_hr	Zn_1_hr	OK	15.9402	16.1607	0.019817	0.0565527	0.9016	1	no
XLOC_001039	XLOC_001039	RNU6-125P	chr1:88537512-88836255	Control_1_hr	Zn_1_hr	NOTEST	0	0	0	0	1	1	no
XLOC_001040	XLOC_001040	RP11-82K18.2	chr1:88923369-88923844	Control_1_hr	Zn_1_hr	NOTEST	0	0	0	0	1	1	no
XLOC_001041	XLOC_001041	RP4-620F22.2	chr1:89258949-89272804	Control_1_hr	Zn_1_hr	NOTEST	0	0	0	0	1	1	no
XLOC_001042	XLOC_001042	RP5-908D6.1	chr1:89324521-89334880	Control_1_hr	Zn_1_hr	NOTEST	0	0	0	0	1	1	no
XLOC_001043	XLOC_001043	GBP6	chr1:89364057-89386461	Control_1_hr	Zn_1_hr	NOTEST	0	0	0	0	1	1	no
XLOC_001044	XLOC_001044	CAPNS1P1	chr1:89394032-89394665	Control_1_hr	Zn_1_hr	NOTEST	0	0	0	0	1	1	no
XLOC_001045	XLOC_001045	GBP1P1	chr1:89407678-89426243	Control_1_hr	Zn_1_hr	NOTEST	0	0	0	0	1	1	no
XLOC_001046	XLOC_001046	LRRC8B	chr1:89524835-89936611	Control_1_hr	Zn_1_hr	OK	3.38163	3.54598	0.0684667	0.139767	0.8089	1	no
XLOC_001047	XLOC_001047	RP11-413E1.4	chr1:89524835-89936611	Control_1_hr	Zn_1_hr	NOTEST	0	0	0	0	1	1	no
XLOC_001048	XLOC_001048	LRRC8C,LRRC8D,RP11-302M6.4	chr1:89524835-89936611	Control_1_hr	Zn_1_hr	OK	36.2394	38.4163	0.0841596	0.362701	0.51465	1	no
XLOC_001049	XLOC_001049	RP5-943J3.1	chr1:89524835-89936611	Control_1_hr	Zn_1_hr	NOTEST	0.0573514	0	#NAME?	0	1	1	no
XLOC_001050	XLOC_001050	RP11-302M6.5	chr1:89939600-89940147	Control_1_hr	Zn_1_hr	NOTEST	0.0863451	0	#NAME?	0	1	1	no
XLOC_001051	XLOC_001051	ZNF326	chr1:89995111-90035531	Control_1_hr	Zn_1_hr	OK	22.4049	21.7098	-0.045469	-0.281363	0.6219	1	no
XLOC_001052	XLOC_001052	U3	chr1:90657749-90657964	Control_1_hr	Zn_1_hr	NOTEST	0	0	0	0	1	1	no
XLOC_001053	XLOC_001053	RP4-665J23.2	chr1:90851758-90854286	Control_1_hr	Zn_1_hr	NOTEST	0	0.0352169	inf	0	1	1	no
XLOC_001054	XLOC_001054	RPL5P6	chr1:91023918-91024804	Control_1_hr	Zn_1_hr	OK	0.5037	0.657957	0.38543	0.615738	0.28835	1	no
XLOC_001055	XLOC_001055	Y_RNA	chr1:91260765-91404869	Control_1_hr	Zn_1_hr	NOTEST	0	0	0	0	1	1	no
XLOC_001056	XLOC_001056	FEN1P1	chr1:91260765-91404869	Control_1_hr	Zn_1_hr	NOTEST	0.0736212	0.00829731	-3.1494	0	1	1	no
XLOC_001057	XLOC_001057	CDC7	chr1:91500892-91525764	Control_1_hr	Zn_1_hr	OK	6.9239	6.7543	-0.0357804	-0.182842	0.74755	1	no
XLOC_001058	XLOC_001058	RP11-91I11.1	chr1:91600170-91600321	Control_1_hr	Zn_1_hr	NOTEST	0	0	0	0	1	1	no
XLOC_001059	XLOC_001059	HSP90B3P	chr1:91642515-91644082	Control_1_hr	Zn_1_hr	OK	5.90429	6.43543	0.124274	0.814263	0.14735	1	no
XLOC_001060	XLOC_001060	BRDT	chr1:91949370-92014426	Control_1_hr	Zn_1_hr	NOTEST	0	0	0	0	1	1	no
XLOC_001061	XLOC_001061	EPHX4	chr1:92029981-92063536	Control_1_hr	Zn_1_hr	OK	0.71464	0.651901	-0.132564	-0.290691	0.58855	1	no
XLOC_001062	XLOC_001062	LPCAT2BP	chr1:92066305-92067839	Control_1_hr	Zn_1_hr	NOTEST	0	0	0	0	1	1	no
XLOC_001063	XLOC_001063	BTBD8	chr1:92080304-92147836	Control_1_hr	Zn_1_hr	OK	0.569622	0.51876	-0.134937	-0.223476	0.6938	1	no
XLOC_001064	XLOC_001064	PRKAR1AP	chr1:92080304-92147836	Control_1_hr	Zn_1_hr	OK	0.49658	0.37891	-0.390173	-0.530286	0.32075	1	no
XLOC_001065	XLOC_001065	KIAA1107	chr1:92167051-92184723	Control_1_hr	Zn_1_hr	OK	0.547479	0.513746	-0.0917471	-0.348885	0.54005	1	no
XLOC_001066	XLOC_001066	RP4-621B10.8	chr1:92189236-92190707	Control_1_hr	Zn_1_hr	NOTEST	0	0	0	0	1	1	no
XLOC_001067	XLOC_001067	RP4-775D17.1	chr1:92203147-92203991	Control_1_hr	Zn_1_hr	NOTEST	0	0	0	0	1	1	no
XLOC_001068	XLOC_001068	C1orf146	chr1:92217939-92245813	Control_1_hr	Zn_1_hr	NOTEST	0	0	0	0	1	1	no
XLOC_001069	XLOC_001069	RPAP2	chr1:92246401-92402056	Control_1_hr	Zn_1_hr	OK	7.5575	6.66976	-0.180274	-0.47501	0.4	1	no
XLOC_001070	XLOC_001070	RP11-330C7.3	chr1:92508695-92792404	Control_1_hr	Zn_1_hr	NOTEST	0.0728125	0.0149611	-2.28297	0	1	1	no
XLOC_001071	XLOC_001071	CCNJP2	chr1:92508695-92792404	Control_1_hr	Zn_1_hr	NOTEST	0	0	0	0	1	1	no
XLOC_001072	XLOC_001072	RPL5,SNORD21	chr1:92832024-92961522	Control_1_hr	Zn_1_hr	OK	260.258	260.803	0.00301762	0.0193985	0.97435	1	no
XLOC_001073	XLOC_001073	SNORA66	chr1:92832024-92961522	Control_1_hr	Zn_1_hr	NOTEST	1.64464	0	#NAME?	0	1	1	no
XLOC_001074	XLOC_001074	SNORA51	chr1:92832024-92961522	Control_1_hr	Zn_1_hr	NOTEST	0	0	0	0	1	1	no
XLOC_001075	XLOC_001075	RP11-386I23.1	chr1:92832024-92961522	Control_1_hr	Zn_1_hr	NOTEST	0.156639	0.126778	-0.305138	0	1	1	no
XLOC_001076	XLOC_001076	RNU6-210P	chr1:93010256-93010351	Control_1_hr	Zn_1_hr	NOTEST	0	0	0	0	1	1	no
XLOC_001077	XLOC_001077	RN7SKP123	chr1:93026251-93026542	Control_1_hr	Zn_1_hr	NOTEST	0	0	0	0	1	1	no
XLOC_001078	XLOC_001078	MTF2	chr1:93079234-93139081	Control_1_hr	Zn_1_hr	OK	8.06982	7.61948	-0.0828443	-0.312687	0.5843	1	no
XLOC_001079	XLOC_001079	CCDC18	chr1:93149741-93369498	Control_1_hr	Zn_1_hr	OK	5.80445	5.47656	-0.0838901	-0.0848903	0.87715	1	no
XLOC_001080	XLOC_001080	DR1	chr1:93149741-93369498	Control_1_hr	Zn_1_hr	OK	19.5959	19.804	0.0152367	0.0464076	0.9343	1	no
XLOC_001081	XLOC_001081	Y_RNA	chr1:93385710-93385817	Control_1_hr	Zn_1_hr	NOTEST	0	0	0	0	1	1	no
XLOC_001082	XLOC_001082	FNBP1L	chr1:93448130-93554661	Control_1_hr	Zn_1_hr	OK	8.08037	8.0123	-0.0122045	-0.0728046	0.89635	1	no
XLOC_001083	XLOC_001083	RP5-1033H22.2	chr1:93561785-93847150	Control_1_hr	Zn_1_hr	NOTEST	0.16221	0.0904635	-0.84246	0	1	1	no
XLOC_001084	XLOC_001084	MIR760	chr1:93561785-93847150	Control_1_hr	Zn_1_hr	NOTEST	0	0	0	0	1	1	no
XLOC_001085	XLOC_001085	RP4-561L24.3	chr1:93847173-93848939	Control_1_hr	Zn_1_hr	NOTEST	0.179293	0.140914	-0.347506	0	1	1	no
XLOC_001086	XLOC_001086	RP11-78O9.1	chr1:94145110-94145619	Control_1_hr	Zn_1_hr	NOTEST	0	0	0	0	1	1	no
XLOC_001087	XLOC_001087	RN7SL440P	chr1:94148987-94275068	Control_1_hr	Zn_1_hr	NOTEST	0	0	0	0	1	1	no
XLOC_001088	XLOC_001088	RP11-148B18.1	chr1:94148987-94275068	Control_1_hr	Zn_1_hr	NOTEST	0	0	0	0	1	1	no
XLOC_001089	XLOC_001089	GAPDHP29	chr1:94302037-94303022	Control_1_hr	Zn_1_hr	NOTEST	0	0.0114361	inf	0	1	1	no
XLOC_001090	XLOC_001090	RP11-148B18.3	chr1:94333266-94334848	Control_1_hr	Zn_1_hr	NOTEST	0	0.0550263	inf	0	1	1	no
XLOC_001091	XLOC_001091	ABCD3	chr1:94418454-94518666	Control_1_hr	Zn_1_hr	OK	24.9878	25.0957	0.00622093	0.0324725	0.9546	1	no
XLOC_001092	XLOC_001092	AC093117.1	chr1:94638460-94820281	Control_1_hr	Zn_1_hr	NOTEST	0	0	0	0	1	1	no
XLOC_001093	XLOC_001093	SLC44A3	chr1:94820341-94895246	Control_1_hr	Zn_1_hr	OK	2.6027	2.5609	-0.023356	-0.0658322	0.8963	1	no
XLOC_001094	XLOC_001094	RP4-639F20.1	chr1:94927565-94963270	Control_1_hr	Zn_1_hr	OK	1.91394	1.97247	0.0434636	0.10318	0.83995	1	no
XLOC_001095	XLOC_001095	RP11-313A24.1	chr1:94974406-95072945	Control_1_hr	Zn_1_hr	NOTEST	0	0	0	0	1	1	no
XLOC_001096	XLOC_001096	RWDD3,TMEM56,TMEM56-RWDD3	chr1:95117337-95278940	Control_1_hr	Zn_1_hr	OK	27.5452	27.4552	-0.00472242	-0.0178258	0.97575	1	no
XLOC_001097	XLOC_001097	RP11-57H12.2	chr1:95117337-95278940	Control_1_hr	Zn_1_hr	OK	0.578613	0	#NAME?	#NAME?	0.21095	1	no
XLOC_001098	XLOC_001098	FLJ31662	chr1:95474736-95479356	Control_1_hr	Zn_1_hr	NOTEST	0	0	0	0	1	1	no
XLOC_001099	XLOC_001099	RP11-286B14.1	chr1:95510115-95782342	Control_1_hr	Zn_1_hr	NOTEST	0	0	0	0	1	1	no
XLOC_001100	XLOC_001100	RP11-286B14.2	chr1:95510115-95782342	Control_1_hr	Zn_1_hr	NOTEST	0	0	0	0	1	1	no
XLOC_001101	XLOC_001101	AC092812.1	chr1:95886539-95886626	Control_1_hr	Zn_1_hr	NOTEST	0	0	0	0	1	1	no
XLOC_001102	XLOC_001102	RP11-147C23.1	chr1:95937900-96022880	Control_1_hr	Zn_1_hr	NOTEST	0	0	0	0	1	1	no
XLOC_001103	XLOC_001103	RNU1-130P	chr1:96225900-96226060	Control_1_hr	Zn_1_hr	NOTEST	0	0	0	0	1	1	no
XLOC_001104	XLOC_001104	RP4-736I12.1	chr1:96390651-96391393	Control_1_hr	Zn_1_hr	NOTEST	0.183477	0.190129	0.0513766	0	1	1	no
XLOC_001105	XLOC_001105	UBE2WP1	chr1:96418593-96418933	Control_1_hr	Zn_1_hr	NOTEST	0	0.17037	inf	0	1	1	no
XLOC_001106	XLOC_001106	EEF1A1P11	chr1:96446929-96448318	Control_1_hr	Zn_1_hr	OK	11.1344	12.1021	0.120231	0.828474	0.147	1	no
XLOC_001107	XLOC_001107	RN7SL831P	chr1:96583208-96583527	Control_1_hr	Zn_1_hr	NOTEST	0	0	0	0	1	1	no
XLOC_001108	XLOC_001108	PTBP2	chr1:96721664-96823738	Control_1_hr	Zn_1_hr	OK	4.37591	4.45115	0.0245955	0.0919359	0.86415	1	no
XLOC_001109	XLOC_001109	AL592205.1	chr1:96902698-96902792	Control_1_hr	Zn_1_hr	NOTEST	0	0	0	0	1	1	no
XLOC_001110	XLOC_001110	AL592205.2	chr1:96935544-96935663	Control_1_hr	Zn_1_hr	NOTEST	0	0	0	0	1	1	no
XLOC_001111	XLOC_001111	DPYD-AS1	chr1:97077742-97921049	Control_1_hr	Zn_1_hr	NOTEST	0.0235045	0	#NAME?	0	1	1	no
XLOC_001112	XLOC_001112	SEC63P1	chr1:97077742-97921049	Control_1_hr	Zn_1_hr	OK	8.106	7.79522	-0.0564017	-0.302818	0.59975	1	no
XLOC_001113	XLOC_001113	RPL26P9	chr1:97077742-97921049	Control_1_hr	Zn_1_hr	NOTEST	0	0	0	0	1	1	no
XLOC_001114	XLOC_001114	RP11-272L13.2	chr1:97077742-97921049	Control_1_hr	Zn_1_hr	NOTEST	0	0	0	0	1	1	no
XLOC_001115	XLOC_001115	DPYD-AS2	chr1:97077742-97921049	Control_1_hr	Zn_1_hr	NOTEST	0	0	0	0	1	1	no
XLOC_001116	XLOC_001116	RP11-272L13.4	chr1:97077742-97921049	Control_1_hr	Zn_1_hr	NOTEST	0	0	0	0	1	1	no
XLOC_001117	XLOC_001117	NFU1P2	chr1:98076999-98077468	Control_1_hr	Zn_1_hr	NOTEST	0	0	0	0	1	1	no
XLOC_001118	XLOC_001118	RP5-1070A16.1	chr1:98210746-98272658	Control_1_hr	Zn_1_hr	NOTEST	0.015399	0.0308363	1.00179	0	1	1	no
XLOC_001119	XLOC_001119	AL160056.1	chr1:98373384-98373499	Control_1_hr	Zn_1_hr	NOTEST	0	0	0	0	1	1	no
XLOC_001120	XLOC_001120	SNX7	chr1:98661700-98760500	Control_1_hr	Zn_1_hr	OK	19.5724	18.2516	-0.100799	-0.435739	0.3979	1	no
XLOC_001121	XLOC_001121	RP5-896L10.1	chr1:98890244-99148852	Control_1_hr	Zn_1_hr	NOTEST	0	0	0	0	1	1	no
XLOC_001122	XLOC_001122	RP11-234N17.1	chr1:98890244-99148852	Control_1_hr	Zn_1_hr	OK	27.1669	25.6111	-0.0850801	-0.322877	0.58065	1	no
XLOC_001123	XLOC_001123	LPPR4	chr1:99263952-99309590	Control_1_hr	Zn_1_hr	NOTEST	0.00310316	0	#NAME?	0	1	1	no
XLOC_001124	XLOC_001124	RP4-735N21.1	chr1:99464377-99464776	Control_1_hr	Zn_1_hr	NOTEST	0	0	0	0	1	1	no
XLOC_001125	XLOC_001125	PALMD	chr1:99645942-99694541	Control_1_hr	Zn_1_hr	OK	0.832756	0.553565	-0.58914	-1.26301	0.0193	0.970119	no
XLOC_001126	XLOC_001126	HMGB3P10	chr1:99698241-99699178	Control_1_hr	Zn_1_hr	NOTEST	0	0	0	0	1	1	no
XLOC_001127	XLOC_001127	Y_RNA	chr1:99791661-99791753	Control_1_hr	Zn_1_hr	NOTEST	0	0	0	0	1	1	no
XLOC_001128	XLOC_001128	RP4-581O6.1	chr1:99842609-99842761	Control_1_hr	Zn_1_hr	NOTEST	0	0	0	0	1	1	no
XLOC_001129	XLOC_001129	AGL	chr1:99850083-99924023	Control_1_hr	Zn_1_hr	OK	3.93434	3.91502	-0.00710053	-0.0429898	0.9405	1	no
XLOC_001130	XLOC_001130	SLC35A3	chr1:99968382-100026979	Control_1_hr	Zn_1_hr	OK	8.56912	8.24708	-0.0552633	-0.258385	0.64935	1	no
XLOC_001131	XLOC_001131	RNU6-750P	chr1:99968382-100026979	Control_1_hr	Zn_1_hr	NOTEST	0	0	0	0	1	1	no
XLOC_001132	XLOC_001132	RP4-714D9.5	chr1:100030565-100035637	Control_1_hr	Zn_1_hr	NOTEST	0.0740671	0.0768458	0.0531333	0	1	1	no
XLOC_001133	XLOC_001133	HIAT1	chr1:100038096-100132955	Control_1_hr	Zn_1_hr	OK	22.7072	22.9282	0.0139697	0.0790588	0.8915	1	no
XLOC_001134	XLOC_001134	RP4-714D9.4	chr1:100038096-100132955	Control_1_hr	Zn_1_hr	NOTEST	0	0	0	0	1	1	no
XLOC_001135	XLOC_001135	TRMT13	chr1:100133149-100178273	Control_1_hr	Zn_1_hr	OK	5.22528	5.39112	0.0450784	0.142514	0.7822	1	no
XLOC_001136	XLOC_001136	RP11-305E17.7	chr1:100186918-100249834	Control_1_hr	Zn_1_hr	NOTEST	0	0	0	0	1	1	no
XLOC_001137	XLOC_001137	BRI3P1	chr1:100186918-100249834	Control_1_hr	Zn_1_hr	OK	0.520434	0.61086	0.231125	0.107031	0.8811	1	no
XLOC_001138	XLOC_001138	RP11-305E17.4	chr1:100186918-100249834	Control_1_hr	Zn_1_hr	NOTEST	0	0	0	0	1	1	no
XLOC_001139	XLOC_001139	RTCA	chr1:100266206-100292769	Control_1_hr	Zn_1_hr	OK	20.3388	21.4092	0.0739981	0.378833	0.5078	1	no
XLOC_001140	XLOC_001140	MIR553	chr1:100266206-100292769	Control_1_hr	Zn_1_hr	NOTEST	0	0	0	0	1	1	no
XLOC_001141	XLOC_001141	RP5-837M10.2	chr1:100344476-100345242	Control_1_hr	Zn_1_hr	NOTEST	0	0	0	0	1	1	no
XLOC_001142	XLOC_001142	CDC14A	chr1:100351733-100520277	Control_1_hr	Zn_1_hr	OK	1.83298	1.91018	0.0595221	0.236685	0.67135	1	no
XLOC_001143	XLOC_001143	GPR88	chr1:100538136-100542018	Control_1_hr	Zn_1_hr	NOTEST	0.0174227	0.010686	-0.705248	0	1	1	no
XLOC_001144	XLOC_001144	RP11-84O12.3	chr1:100651946-100652267	Control_1_hr	Zn_1_hr	NOTEST	0	0	0	0	1	1	no
XLOC_001145	XLOC_001145	VCAM1	chr1:100719741-100739045	Control_1_hr	Zn_1_hr	NOTEST	0.0530708	0.0280262	-0.921144	0	1	1	no
XLOC_001146	XLOC_001146	RP4-549L20.3	chr1:100872371-100895998	Control_1_hr	Zn_1_hr	NOTEST	0.196457	0	#NAME?	0	1	1	no
XLOC_001147	XLOC_001147	SLC30A7	chr1:100896075-100981753	Control_1_hr	Zn_1_hr	OK	3.59356	3.75464	0.0632602	0.226118	0.6962	1	no
XLOC_001148	XLOC_001148	RP11-421L21.2	chr1:100989622-101087268	Control_1_hr	Zn_1_hr	NOTEST	0.248331	0.122657	-1.01764	0	1	1	no
XLOC_001149	XLOC_001149	RP11-421L21.3	chr1:100989622-101087268	Control_1_hr	Zn_1_hr	OK	1.85706	1.5223	-0.286773	-0.404161	0.4609	1	no
XLOC_001150	XLOC_001150	AC093157.1,SCARNA16	chr1:101133152-101133340	Control_1_hr	Zn_1_hr	NOTEST	0	0	0	0	1	1	no
XLOC_001151	XLOC_001151	RP5-1033H2.1	chr1:101190519-101190994	Control_1_hr	Zn_1_hr	NOTEST	0	0	0	0	1	1	no
XLOC_001152	XLOC_001152	S1PR1	chr1:101236887-101241518	Control_1_hr	Zn_1_hr	NOTEST	0.0487703	0.133705	1.45498	0	1	1	no
XLOC_001153	XLOC_001153	RP4-575N6.5	chr1:101243157-101243749	Control_1_hr	Zn_1_hr	NOTEST	0	0	0	0	1	1	no
XLOC_001154	XLOC_001154	RP4-575N6.2	chr1:101256273-101256616	Control_1_hr	Zn_1_hr	OK	12.3009	13.5669	0.141322	0.517011	0.37505	1	no
XLOC_001155	XLOC_001155	LINC01307	chr1:101323336-101390303	Control_1_hr	Zn_1_hr	NOTEST	0	0	0	0	1	1	no
XLOC_001156	XLOC_001156	RP11-411H5.1	chr1:101723741-101729614	Control_1_hr	Zn_1_hr	NOTEST	0	0	0	0	1	1	no
XLOC_001157	XLOC_001157	RNU6-352P	chr1:101802573-101997030	Control_1_hr	Zn_1_hr	NOTEST	0	0	0	0	1	1	no
XLOC_001158	XLOC_001158	RP11-82O2.2	chr1:101802573-101997030	Control_1_hr	Zn_1_hr	NOTEST	0	0	0	0	1	1	no
XLOC_001159	XLOC_001159	DNAJA1P5	chr1:101802573-101997030	Control_1_hr	Zn_1_hr	NOTEST	0	0	0	0	1	1	no
XLOC_001160	XLOC_001160	RP11-153F1.2	chr1:103414878-103525483	Control_1_hr	Zn_1_hr	NOTEST	0	0	0	0	1	1	no
XLOC_001161	XLOC_001161	RN7SKP285	chr1:103414878-103525483	Control_1_hr	Zn_1_hr	NOTEST	0	0	0	0	1	1	no
XLOC_001162	XLOC_001162	ACTG1P4,AMY2B,RNPC3	chr1:103525690-103579534	Control_1_hr	Zn_1_hr	OK	5.48943	5.61927	0.0337259	0.111422	0.83085	1	no
XLOC_001163	XLOC_001163	AMY2A	chr1:103616810-103625780	Control_1_hr	Zn_1_hr	NOTEST	0	0	0	0	1	1	no
XLOC_001164	XLOC_001164	AMY1A	chr1:103655289-103664554	Control_1_hr	Zn_1_hr	NOTEST	0	0	0	0	1	1	no
XLOC_001165	XLOC_001165	AMYP1	chr1:103713722-103719871	Control_1_hr	Zn_1_hr	NOTEST	0	0	0	0	1	1	no
XLOC_001166	XLOC_001166	AMY1C	chr1:103750405-103758690	Control_1_hr	Zn_1_hr	NOTEST	0	0	0	0	1	1	no
XLOC_001167	XLOC_001167	RP11-97C18.1	chr1:103926566-103927806	Control_1_hr	Zn_1_hr	NOTEST	0.0429636	0.0517423	0.268231	0	1	1	no
XLOC_001168	XLOC_001168	RP11-364B6.1,RP11-364B6.2	chr1:104073009-104077087	Control_1_hr	Zn_1_hr	OK	1.69586	1.01107	-0.746134	-1.1895	0.0423	1	no
XLOC_001169	XLOC_001169	AC092506.1	chr1:104153271-104153830	Control_1_hr	Zn_1_hr	NOTEST	0	0	0	0	1	1	no
XLOC_001170	XLOC_001170	RP11-414B7.1	chr1:105433993-105434821	Control_1_hr	Zn_1_hr	NOTEST	0	0	0	0	1	1	no
XLOC_001171	XLOC_001171	SEPT2P1	chr1:105698038-105698218	Control_1_hr	Zn_1_hr	OK	85.6224	87.0276	0.0234847	0.0908387	0.87495	1	no
XLOC_001172	XLOC_001172	RP11-90H3.1	chr1:105891738-105893517	Control_1_hr	Zn_1_hr	OK	5.58871	5.10935	-0.129376	-0.879769	0.1194	1	no
XLOC_001173	XLOC_001173	RP5-947P14.1	chr1:106073246-106084499	Control_1_hr	Zn_1_hr	NOTEST	0.168501	0.0155955	-3.43356	0	1	1	no
XLOC_001174	XLOC_001174	RP11-110F24.1	chr1:106780222-106780435	Control_1_hr	Zn_1_hr	NOTEST	0	0	0	0	1	1	no
XLOC_001175	XLOC_001175	RP11-233E12.1	chr1:106818238-106838167	Control_1_hr	Zn_1_hr	NOTEST	0	0	0	0	1	1	no
XLOC_001176	XLOC_001176	PRMT6	chr1:107056678-107059294	Control_1_hr	Zn_1_hr	NOTEST	0	0.00325941	inf	0	1	1	no
XLOC_001177	XLOC_001177	NTNG1	chr1:107140006-107483458	Control_1_hr	Zn_1_hr	NOTEST	0.0149	0	#NAME?	0	1	1	no
XLOC_001178	XLOC_001178	RP11-270C12.3	chr1:107505202-107505448	Control_1_hr	Zn_1_hr	OK	194.368	202.737	0.0608196	0.427272	0.4515	1	no
XLOC_001179	XLOC_001179	MIR7852	chr1:107571159-107994607	Control_1_hr	Zn_1_hr	NOTEST	0	0	0	0	1	1	no
XLOC_001180	XLOC_001180	VAV3-AS1	chr1:107571159-107994607	Control_1_hr	Zn_1_hr	NOTEST	0	0	0	0	1	1	no
XLOC_001181	XLOC_001181	RP11-356N1.2	chr1:108071481-108074519	Control_1_hr	Zn_1_hr	NOTEST	0	0.0376442	inf	0	1	1	no
XLOC_001182	XLOC_001182	RP11-483I13.5,RP11-483I13.6	chr1:108134035-108202743	Control_1_hr	Zn_1_hr	OK	0.407637	0.240081	-0.763764	-0.344872	0.6475	1	no
XLOC_001183	XLOC_001183	SLC25A24P1	chr1:108261195-108337853	Control_1_hr	Zn_1_hr	NOTEST	0.0245299	0.0370967	0.596748	0	1	1	no
XLOC_001184	XLOC_001184	NBPF5P,NBPF6	chr1:108375798-108471002	Control_1_hr	Zn_1_hr	NOTEST	0.00623548	0	#NAME?	0	1	1	no
XLOC_001185	XLOC_001185	RP11-131J3.1	chr1:108375798-108471002	Control_1_hr	Zn_1_hr	NOTEST	0	0	0	0	1	1	no
XLOC_001186	XLOC_001186	ST13P21	chr1:108502357-108503455	Control_1_hr	Zn_1_hr	NOTEST	0.0205117	0	#NAME?	0	1	1	no
XLOC_001187	XLOC_001187	RP5-964H19.2	chr1:108508573-108509243	Control_1_hr	Zn_1_hr	NOTEST	0	0	0	0	1	1	no
XLOC_001188	XLOC_001188	FAM102B	chr1:108560088-108644900	Control_1_hr	Zn_1_hr	OK	4.22688	4.42027	0.064541	0.39471	0.4912	1	no
XLOC_001189	XLOC_001189	PRPF38B	chr1:108692322-108701803	Control_1_hr	Zn_1_hr	OK	20.5151	19.5272	-0.0712042	-0.396246	0.4858	1	no
XLOC_001190	XLOC_001190	FNDC7	chr1:108712656-108742740	Control_1_hr	Zn_1_hr	NOTEST	0.00858914	0	#NAME?	0	1	1	no
XLOC_001191	XLOC_001191	STXBP3	chr1:108746673-108809526	Control_1_hr	Zn_1_hr	OK	16.1728	16.7566	0.0511569	0.170802	0.74355	1	no
XLOC_001192	XLOC_001192	SPATA42	chr1:108815897-108963484	Control_1_hr	Zn_1_hr	NOTEST	0.0371839	0	#NAME?	0	1	1	no
XLOC_001193	XLOC_001193	GPSM2	chr1:108815897-108963484	Control_1_hr	Zn_1_hr	OK	7.97178	7.83675	-0.0246462	-0.0690332	0.9009	1	no
XLOC_001194	XLOC_001194	RP11-20O24.4	chr1:108970213-109042113	Control_1_hr	Zn_1_hr	OK	31.6725	31.694	0.00097936	0.00375058	0.996	1	no
XLOC_001195	XLOC_001195	RP11-20O24.1	chr1:108970213-109042113	Control_1_hr	Zn_1_hr	NOTEST	0	0.164616	inf	0	1	1	no
XLOC_001196	XLOC_001196	RANP5	chr1:109046827-109047482	Control_1_hr	Zn_1_hr	NOTEST	0	0.0194886	inf	0	1	1	no
XLOC_001197	XLOC_001197	TMEM167B	chr1:109087970-109096934	Control_1_hr	Zn_1_hr	OK	7.88792	7.7039	-0.0340552	-0.123418	0.8266	1	no
XLOC_001198	XLOC_001198	SCARNA2	chr1:109100192-109100619	Control_1_hr	Zn_1_hr	OK	0.803723	0.399219	-1.00952	-0.759863	0.12205	1	no
XLOC_001199	XLOC_001199	KIAA1324	chr1:109105950-109206781	Control_1_hr	Zn_1_hr	OK	0.702177	0.959684	0.450725	0.472685	0.2502	1	no
XLOC_001200	XLOC_001200	SARS	chr1:109213917-109238169	Control_1_hr	Zn_1_hr	OK	52.0684	52.7941	0.0199701	0.123657	0.8291	1	no
XLOC_001201	XLOC_001201	CELSR2	chr1:109250018-109275750	Control_1_hr	Zn_1_hr	OK	5.87606	6.15691	0.0673576	0.334806	0.5369	1	no
XLOC_001202	XLOC_001202	SYPL2	chr1:109466627-109482137	Control_1_hr	Zn_1_hr	NOTEST	0.0526608	0.0664379	0.335277	0	1	1	no
XLOC_001203	XLOC_001203	ATXN7L2	chr1:109483478-109492804	Control_1_hr	Zn_1_hr	OK	2.04113	1.57171	-0.377035	-1.2901	0.01605	0.893974	no
XLOC_001204	XLOC_001204	CYB561D1	chr1:109494051-109502932	Control_1_hr	Zn_1_hr	OK	2.81233	2.84389	0.0161015	0.0430317	0.92225	1	no
XLOC_001205	XLOC_001205	GPR61	chr1:109539871-109548406	Control_1_hr	Zn_1_hr	NOTEST	0.113073	0.132711	0.23104	0	1	1	no
XLOC_001206	XLOC_001206	AMPD2,GNAI3,MIR197,RP5-1160K1.3	chr1:109548610-109632051	Control_1_hr	Zn_1_hr	OK	24.6688	23.2393	-0.0861231	-0.218499	0.67705	1	no
XLOC_001207	XLOC_001207	RPL7P8	chr1:109651369-109652099	Control_1_hr	Zn_1_hr	NOTEST	0.0482852	0.0147131	-1.71448	0	1	1	no
XLOC_001208	XLOC_001208	GSTM1,GSTM2,GSTM4	chr1:109656080-109709551	Control_1_hr	Zn_1_hr	OK	6.60707	6.61792	0.00236748	0.0124588	0.9785	1	no
XLOC_001209	XLOC_001209	GSTM5,RP4-735C1.4	chr1:109712254-109775428	Control_1_hr	Zn_1_hr	NOTEST	0	0	0	0	1	1	no
XLOC_001210	XLOC_001210	RP4-735C1.6	chr1:109828354-109871436	Control_1_hr	Zn_1_hr	NOTEST	0.132103	0	#NAME?	0	1	1	no
XLOC_001211	XLOC_001211	RP11-195M16.3	chr1:109895972-109897861	Control_1_hr	Zn_1_hr	NOTEST	0.011011	0.0153853	0.482611	0	1	1	no
XLOC_001212	XLOC_001212	CSF1	chr1:109910241-109930992	Control_1_hr	Zn_1_hr	OK	19.1132	20.2948	0.0865427	0.517539	0.34695	1	no
XLOC_001213	XLOC_001213	AHCYL1	chr1:109984685-110023741	Control_1_hr	Zn_1_hr	OK	50.3392	54.9342	0.126021	0.594555	0.2864	1	no
XLOC_001214	XLOC_001214	STRIP1	chr1:110031576-110074641	Control_1_hr	Zn_1_hr	OK	9.30996	8.42189	-0.144631	-0.638488	0.2541	1	no
XLOC_001215	XLOC_001215	RP4-773N10.4	chr1:110031576-110074641	Control_1_hr	Zn_1_hr	OK	1.05036	1.07921	0.0390924	0.0890774	0.87275	1	no
XLOC_001216	XLOC_001216	LINC01397	chr1:110082687-110109719	Control_1_hr	Zn_1_hr	NOTEST	0.0321204	0.0437293	0.445112	0	1	1	no
XLOC_001217	XLOC_001217	UBL4B	chr1:110112467-110113945	Control_1_hr	Zn_1_hr	NOTEST	0.010303	0.0232742	1.17567	0	1	1	no
XLOC_001218	XLOC_001218	SLC6A17	chr1:110150485-110202202	Control_1_hr	Zn_1_hr	OK	1.192	1.5349	0.364765	1.54663	0.00405	0.409646	no
XLOC_001219	XLOC_001219	KCNC4	chr1:110211342-110283100	Control_1_hr	Zn_1_hr	OK	1.89497	1.79107	-0.0813529	-0.277223	0.58	1	no
XLOC_001220	XLOC_001220	SNORA25	chr1:110211342-110283100	Control_1_hr	Zn_1_hr	NOTEST	0	0	0	0	1	1	no
XLOC_001221	XLOC_001221	RBM15	chr1:110286374-110346681	Control_1_hr	Zn_1_hr	OK	4.34318	4.68181	0.108313	0.747392	0.1911	1	no
XLOC_001222	XLOC_001222	LAMTOR5-AS1	chr1:110347115-110443817	Control_1_hr	Zn_1_hr	OK	1.12177	1.02229	-0.133964	-0.0583922	0.6892	1	no
XLOC_001223	XLOC_001223	RP5-1074L1.4	chr1:110347115-110443817	Control_1_hr	Zn_1_hr	OK	0.463774	0.379547	-0.289144	-0.193377	0.7332	1	no
XLOC_001224	XLOC_001224	PROK1	chr1:110451199-110457354	Control_1_hr	Zn_1_hr	NOTEST	0	0	0	0	1	1	no
XLOC_001225	XLOC_001225	CYMP	chr1:110480751-110491277	Control_1_hr	Zn_1_hr	NOTEST	0.0989824	0.103522	0.064688	0	1	1	no
XLOC_001226	XLOC_001226	AL365361.1	chr1:110593579-110631474	Control_1_hr	Zn_1_hr	NOTEST	0	0	0	0	1	1	no
XLOC_001227	XLOC_001227	OR11I1P	chr1:110853937-110854891	Control_1_hr	Zn_1_hr	NOTEST	0	0.0103806	inf	0	1	1	no
XLOC_001228	XLOC_001228	CD53	chr1:110873153-110899928	Control_1_hr	Zn_1_hr	NOTEST	0.0613996	0.0109111	-2.49244	0	1	1	no
XLOC_001229	XLOC_001229	RP11-96K19.2	chr1:110943466-110964649	Control_1_hr	Zn_1_hr	NOTEST	0.282662	0.187108	-0.595208	0	1	1	no
XLOC_001230	XLOC_001230	RP11-96K19.5	chr1:110943466-110964649	Control_1_hr	Zn_1_hr	NOTEST	0.266918	0.238706	-0.161162	0	1	1	no
XLOC_001231	XLOC_001231	RNA5SP54	chr1:111041833-111041925	Control_1_hr	Zn_1_hr	NOTEST	0	0	0	0	1	1	no
XLOC_001232	XLOC_001232	CEPT1	chr1:111117332-111185102	Control_1_hr	Zn_1_hr	OK	9.52913	9.34946	-0.0274608	-0.105995	0.8472	1	no
XLOC_001233	XLOC_001233	CHI3L2	chr1:111187173-111243440	Control_1_hr	Zn_1_hr	NOTEST	0.0213075	0.0123717	-0.784316	0	1	1	no
XLOC_001234	XLOC_001234	CHIAP1	chr1:111250253-111256715	Control_1_hr	Zn_1_hr	NOTEST	0	0	0	0	1	1	no
XLOC_001235	XLOC_001235	CHIAP2	chr1:111280058-111286116	Control_1_hr	Zn_1_hr	NOTEST	0	0	0	0	1	1	no
XLOC_001236	XLOC_001236	CHIA	chr1:111290861-111324075	Control_1_hr	Zn_1_hr	NOTEST	0	0	0	0	1	1	no
XLOC_001237	XLOC_001237	RP5-1125M8.3	chr1:111290861-111324075	Control_1_hr	Zn_1_hr	NOTEST	0	0	0	0	1	1	no
XLOC_001238	XLOC_001238	PIFO	chr1:111346287-111353013	Control_1_hr	Zn_1_hr	OK	0.427523	0.613359	0.520731	0.52099	0.2975	1	no
XLOC_001239	XLOC_001239	HIGD1AP12	chr1:111380290-111380571	Control_1_hr	Zn_1_hr	NOTEST	0	0	0	0	1	1	no
XLOC_001240	XLOC_001240	UBE2FP3	chr1:111437513-111438037	Control_1_hr	Zn_1_hr	OK	0.743372	0.356353	-1.06078	-0.95341	0.10265	1	no
XLOC_001241	XLOC_001241	Y_RNA	chr1:111438637-111462773	Control_1_hr	Zn_1_hr	NOTEST	0	0	0	0	1	1	no
XLOC_001242	XLOC_001242	ATP5F1	chr1:111438637-111462773	Control_1_hr	Zn_1_hr	OK	81.3775	79.3686	-0.036062	-0.146207	0.797	1	no
XLOC_001243	XLOC_001243	C1orf162	chr1:111473791-111478512	Control_1_hr	Zn_1_hr	NOTEST	0.0786798	0.0329686	-1.2549	0	1	1	no
XLOC_001244	XLOC_001244	RAP1A	chr1:111483347-111768016	Control_1_hr	Zn_1_hr	OK	18.4861	18.3231	-0.0127779	-0.04731	0.9339	1	no
XLOC_001245	XLOC_001245	FAM212B-AS1	chr1:111483347-111768016	Control_1_hr	Zn_1_hr	OK	0.702164	0.527398	-0.412916	-0.314851	0.5599	1	no
XLOC_001246	XLOC_001246	DDX20	chr1:111483347-111768016	Control_1_hr	Zn_1_hr	OK	6.21446	5.59725	-0.150911	-0.563614	0.2938	1	no
XLOC_001247	XLOC_001247	KCND3-AS1	chr1:111770661-111989155	Control_1_hr	Zn_1_hr	NOTEST	0	0	0	0	1	1	no
XLOC_001248	XLOC_001248	RP11-88H9.2	chr1:111989769-111998842	Control_1_hr	Zn_1_hr	NOTEST	0	0	0	0	1	1	no
XLOC_001249	XLOC_001249	TXNP3	chr1:112363280-112363581	Control_1_hr	Zn_1_hr	NOTEST	0.151462	0	#NAME?	0	1	1	no
XLOC_001250	XLOC_001250	snoU13	chr1:112371003-112371107	Control_1_hr	Zn_1_hr	NOTEST	0	0	0	0	1	1	no
XLOC_001251	XLOC_001251	CTTNBP2NL	chr1:112396180-112463456	Control_1_hr	Zn_1_hr	OK	4.2207	3.79707	-0.152592	-0.51149	0.3666	1	no
XLOC_001252	XLOC_001252	WNT2B	chr1:112466540-112671619	Control_1_hr	Zn_1_hr	NOTEST	0.190026	0.302884	0.672571	0	1	1	no
XLOC_001253	XLOC_001253	CAPZA1	chr1:112466540-112671619	Control_1_hr	Zn_1_hr	OK	52.1617	53.6518	0.0406376	0.196629	0.72875	1	no
XLOC_001254	XLOC_001254	MOV10	chr1:112673140-112700746	Control_1_hr	Zn_1_hr	OK	18.9413	18.1147	-0.0643785	-0.230279	0.6743	1	no
XLOC_001255	XLOC_001255	RP11-426L16.9	chr1:112715671-112717796	Control_1_hr	Zn_1_hr	NOTEST	0.00654914	0.0122637	0.905012	0	1	1	no
XLOC_001256	XLOC_001256	FAM19A3	chr1:112720418-112727235	Control_1_hr	Zn_1_hr	NOTEST	0.124798	0.0761483	-0.71271	0	1	1	no
XLOC_001257	XLOC_001257	NUTF2P4	chr1:112748094-112748475	Control_1_hr	Zn_1_hr	OK	0.957614	0.996805	0.0578665	0.0561785	0.93725	1	no
XLOC_001258	XLOC_001258	RP3-522D1.1	chr1:112820169-112877871	Control_1_hr	Zn_1_hr	NOTEST	0.277969	0.0601174	-2.20907	0	1	1	no
XLOC_001259	XLOC_001259	AKR7A2P1	chr1:112911846-112999496	Control_1_hr	Zn_1_hr	NOTEST	0	0	0	0	1	1	no
XLOC_001260	XLOC_001260	SLC16A1-AS1	chr1:112911846-112999496	Control_1_hr	Zn_1_hr	NOTEST	0	0.0234546	inf	0	1	1	no
XLOC_001261	XLOC_001261	RP11-389O22.1	chr1:113008253-113073105	Control_1_hr	Zn_1_hr	NOTEST	0	0.0426231	inf	0	1	1	no
XLOC_001262	XLOC_001262	LRIG2	chr1:113073208-113132260	Control_1_hr	Zn_1_hr	OK	2.6342	2.61439	-0.0108895	-0.0325728	0.95325	1	no
XLOC_001263	XLOC_001263	Metazoa_SRP	chr1:113073208-113132260	Control_1_hr	Zn_1_hr	NOTEST	0	0.0643658	inf	0	1	1	no
XLOC_001264	XLOC_001264	RP11-389O22.4	chr1:113168993-113169403	Control_1_hr	Zn_1_hr	OK	21.4912	20.0817	-0.0978689	-0.545426	0.3463	1	no
XLOC_001265	XLOC_001265	RP11-389O22.5	chr1:113198824-113199258	Control_1_hr	Zn_1_hr	NOTEST	0.148523	0.102242	-0.538697	0	1	1	no
XLOC_001266	XLOC_001266	MAGI3	chr1:113390748-113685923	Control_1_hr	Zn_1_hr	OK	4.5901	4.26853	-0.104788	-0.292675	0.60645	1	no
XLOC_001267	XLOC_001267	RP11-512F24.1	chr1:113390748-113685923	Control_1_hr	Zn_1_hr	OK	18.152	16.9705	-0.0970961	-0.391008	0.4958	1	no
XLOC_001268	XLOC_001268	RP5-1073O3.2	chr1:113761831-113914086	Control_1_hr	Zn_1_hr	NOTEST	0	0	0	0	1	1	no
XLOC_001269	XLOC_001269	AP4B1-AS1	chr1:113761831-113914086	Control_1_hr	Zn_1_hr	OK	0.464803	0.252161	-0.882274	-0.48746	0.3942	1	no
XLOC_001270	XLOC_001270	DCLRE1B	chr1:113761831-113914086	Control_1_hr	Zn_1_hr	OK	5.27017	5.3693	0.0268854	0.108896	0.8498	1	no
XLOC_001271	XLOC_001271	HIPK1	chr1:113923999-113977869	Control_1_hr	Zn_1_hr	OK	8.98228	9.18816	0.0326952	0.18002	0.74815	1	no
XLOC_001272	XLOC_001272	OLFML3	chr1:113979390-113982254	Control_1_hr	Zn_1_hr	OK	1.99726	1.76745	-0.176358	-0.746615	0.17455	1	no
XLOC_001273	XLOC_001273	RP4-591B8.3	chr1:114353985-114355178	Control_1_hr	Zn_1_hr	NOTEST	0	0	0	0	1	1	no
XLOC_001274	XLOC_001274	RP4-591B8.2	chr1:114392776-114511160	Control_1_hr	Zn_1_hr	NOTEST	0	0	0	0	1	1	no
XLOC_001275	XLOC_001275	EIF2S2P5	chr1:114392776-114511160	Control_1_hr	Zn_1_hr	NOTEST	0.0162029	0	#NAME?	0	1	1	no
XLOC_001276	XLOC_001276	Y_RNA	chr1:114392776-114511160	Control_1_hr	Zn_1_hr	NOTEST	0	0	0	0	1	1	no
XLOC_001277	XLOC_001277	PKMP1	chr1:114535994-114537840	Control_1_hr	Zn_1_hr	OK	28.0966	26.9323	-0.0610591	-0.387502	0.49555	1	no
XLOC_001278	XLOC_001278	RNY1P13	chr1:114704468-114758676	Control_1_hr	Zn_1_hr	NOTEST	0	0	0	0	1	1	no
XLOC_001279	XLOC_001279	NR1H5P	chr1:114837226-114851453	Control_1_hr	Zn_1_hr	NOTEST	0	0	0	0	1	1	no
XLOC_001280	XLOC_001280	SYCP1	chr1:114854802-114995370	Control_1_hr	Zn_1_hr	NOTEST	0	0	0	0	1	1	no
XLOC_001281	XLOC_001281	TSHB	chr1:115029823-115034309	Control_1_hr	Zn_1_hr	NOTEST	0	0	0	0	1	1	no
XLOC_001282	XLOC_001282	RP4-666F24.3	chr1:115099671-115102658	Control_1_hr	Zn_1_hr	NOTEST	0	0	0	0	1	1	no
XLOC_001283	XLOC_001283	RP4-663N10.1	chr1:115283033-115368072	Control_1_hr	Zn_1_hr	NOTEST	0	0.0134169	inf	0	1	1	no
XLOC_001284	XLOC_001284	RP4-663N10.2	chr1:115471940-115476027	Control_1_hr	Zn_1_hr	NOTEST	0	0	0	0	1	1	no
XLOC_001285	XLOC_001285	RP4-663N10.3	chr1:115479427-115481572	Control_1_hr	Zn_1_hr	NOTEST	0.15491	0	#NAME?	0	1	1	no
XLOC_001286	XLOC_001286	TCEB1P20	chr1:115556825-115557475	Control_1_hr	Zn_1_hr	NOTEST	0	0.0827906	inf	0	1	1	no
XLOC_001287	XLOC_001287	CNOT7P2	chr1:115564600-115565432	Control_1_hr	Zn_1_hr	NOTEST	0.0688998	0.0247269	-1.47842	0	1	1	no
XLOC_001288	XLOC_001288	RN7SL420P	chr1:115606470-115606768	Control_1_hr	Zn_1_hr	NOTEST	0	0.071181	inf	0	1	1	no
XLOC_001289	XLOC_001289	VANGL1	chr1:115641952-115698224	Control_1_hr	Zn_1_hr	OK	12.422	12.3603	-0.00718532	-0.0328975	0.9523	1	no
XLOC_001290	XLOC_001290	RP11-12L8.2	chr1:115916496-115916699	Control_1_hr	Zn_1_hr	NOTEST	0	0	0	0	1	1	no
XLOC_001291	XLOC_001291	RP11-12L8.1	chr1:115919375-115925908	Control_1_hr	Zn_1_hr	NOTEST	0	0	0	0	1	1	no
XLOC_001292	XLOC_001292	SLC22A15	chr1:115976497-116070054	Control_1_hr	Zn_1_hr	OK	0.817676	1.15547	0.49888	0.591435	0.27935	1	no
XLOC_001293	XLOC_001293	MAB21L3	chr1:116111754-116135240	Control_1_hr	Zn_1_hr	NOTEST	0.0447962	0.00349155	-3.68144	0	1	1	no
XLOC_001294	XLOC_001294	RP5-1185H19.2	chr1:116164283-116166241	Control_1_hr	Zn_1_hr	NOTEST	0	0	0	0	1	1	no
XLOC_001295	XLOC_001295	U3	chr1:116278605-116278821	Control_1_hr	Zn_1_hr	NOTEST	0	0	0	0	1	1	no
XLOC_001296	XLOC_001296	ATP1A1	chr1:116372667-116418622	Control_1_hr	Zn_1_hr	OK	76.524	78.937	0.044789	0.289923	0.6029	1	no
XLOC_001297	XLOC_001297	Y_RNA	chr1:116423723-116478842	Control_1_hr	Zn_1_hr	NOTEST	0	0	0	0	1	1	no
XLOC_001298	XLOC_001298	MIR320B1	chr1:116671748-116671827	Control_1_hr	Zn_1_hr	NOTEST	0	0	0	0	1	1	no
XLOC_001299	XLOC_001299	C1orf137	chr1:116694111-116706603	Control_1_hr	Zn_1_hr	NOTEST	0	0	0	0	1	1	no
XLOC_001300	XLOC_001300	CD2	chr1:116754384-116769228	Control_1_hr	Zn_1_hr	NOTEST	0	0	0	0	1	1	no
XLOC_001301	XLOC_001301	AL157904.1	chr1:116905149-116905294	Control_1_hr	Zn_1_hr	NOTEST	0	0	0	0	1	1	no
XLOC_001302	XLOC_001302	PTGFRN	chr1:116910056-116990358	Control_1_hr	Zn_1_hr	OK	8.58431	8.61	0.00431039	0.0193655	0.9703	1	no
XLOC_001303	XLOC_001303	CD101	chr1:117001749-117059490	Control_1_hr	Zn_1_hr	NOTEST	0.13376	0.0706338	-0.921215	0	1	1	no
XLOC_001304	XLOC_001304	TTF2	chr1:117060302-117107453	Control_1_hr	Zn_1_hr	OK	24.3797	22.4487	-0.119046	-0.402667	0.4863	1	no
XLOC_001305	XLOC_001305	MIR942	chr1:117060302-117107453	Control_1_hr	Zn_1_hr	NOTEST	0	0	0	0	1	1	no
XLOC_001306	XLOC_001306	RPS15AP9	chr1:117138228-117138609	Control_1_hr	Zn_1_hr	NOTEST	0	0	0	0	1	1	no
XLOC_001307	XLOC_001307	LINC01525	chr1:117295519-117321336	Control_1_hr	Zn_1_hr	NOTEST	0	0	0	0	1	1	no
XLOC_001308	XLOC_001308	MAN1A2	chr1:117367448-117528872	Control_1_hr	Zn_1_hr	OK	6.95303	7.10531	0.0312548	0.149786	0.77535	1	no
XLOC_001309	XLOC_001309	RP4-675C20.4	chr1:117367448-117528872	Control_1_hr	Zn_1_hr	NOTEST	0.0240629	0.0609574	1.34099	0	1	1	no
XLOC_001310	XLOC_001310	VPS25P1	chr1:117549414-117549922	Control_1_hr	Zn_1_hr	NOTEST	0.235448	0.338882	0.525372	0	1	1	no
XLOC_001311	XLOC_001311	FAM46C	chr1:117605933-117628372	Control_1_hr	Zn_1_hr	NOTEST	0.0747834	0.0592109	-0.336854	0	1	1	no
XLOC_001312	XLOC_001312	WDR3	chr1:117929719-118185223	Control_1_hr	Zn_1_hr	OK	17.7177	18.5699	0.0677707	0.212122	0.71195	1	no
XLOC_001313	XLOC_001313	RP4-630J13.1	chr1:118712998-118713678	Control_1_hr	Zn_1_hr	NOTEST	0.0530484	0.0954448	0.847359	0	1	1	no
XLOC_001314	XLOC_001314	WARS2-IT1	chr1:119031215-119327303	Control_1_hr	Zn_1_hr	NOTEST	0.00712612	0.00910763	0.35396	0	1	1	no
XLOC_001315	XLOC_001315	RP11-418J17.1	chr1:119031215-119327303	Control_1_hr	Zn_1_hr	OK	3.55409	3.30588	-0.104444	-0.218381	0.69145	1	no
XLOC_001316	XLOC_001316	RP5-834N19.1	chr1:119328175-119356182	Control_1_hr	Zn_1_hr	NOTEST	0	0	0	0	1	1	no
XLOC_001317	XLOC_001317	HAO2	chr1:119368778-119394130	Control_1_hr	Zn_1_hr	NOTEST	0.0104162	0	#NAME?	0	1	1	no
XLOC_001318	XLOC_001318	HAO2-IT1	chr1:119368778-119394130	Control_1_hr	Zn_1_hr	NOTEST	0	0	0	0	1	1	no
XLOC_001319	XLOC_001319	HSD3B2	chr1:119414930-119423035	Control_1_hr	Zn_1_hr	NOTEST	0	0	0	0	1	1	no
XLOC_001320	XLOC_001320	HSD3BP2	chr1:119439000-119446086	Control_1_hr	Zn_1_hr	NOTEST	0	0	0	0	1	1	no
XLOC_001321	XLOC_001321	HSD3BP1	chr1:119467220-119473803	Control_1_hr	Zn_1_hr	NOTEST	0	0	0	0	1	1	no
XLOC_001322	XLOC_001322	HSD3B1	chr1:119507197-119515054	Control_1_hr	Zn_1_hr	NOTEST	0	0.0519794	inf	0	1	1	no
XLOC_001323	XLOC_001323	HSD3BP3	chr1:119538508-119545913	Control_1_hr	Zn_1_hr	NOTEST	0	0	0	0	1	1	no
XLOC_001324	XLOC_001324	HSD3BP4	chr1:119564065-119572067	Control_1_hr	Zn_1_hr	NOTEST	0.0141985	0	#NAME?	0	1	1	no
XLOC_001325	XLOC_001325	HSD3BP5	chr1:119601339-119609250	Control_1_hr	Zn_1_hr	NOTEST	0.0197781	0.00841222	-1.23335	0	1	1	no
XLOC_001326	XLOC_001326	PHGDH	chr1:119659797-119744215	Control_1_hr	Zn_1_hr	OK	31.7163	31.4605	-0.0116803	-0.0743063	0.8985	1	no
XLOC_001327	XLOC_001327	PFN1P9	chr1:119853315-119853748	Control_1_hr	Zn_1_hr	OK	20.6616	20.4946	-0.0117097	-0.0681287	0.9045	1	no
XLOC_001328	XLOC_001328	NOTCH2P1	chr1:119886303-119886927	Control_1_hr	Zn_1_hr	NOTEST	0	0	0	0	1	1	no
XLOC_001329	XLOC_001329	RP11-114O18.1	chr1:120076615-120077091	Control_1_hr	Zn_1_hr	NOTEST	0	0	0	0	1	1	no
XLOC_001330	XLOC_001330	RNU6-465P	chr1:120126973-120127074	Control_1_hr	Zn_1_hr	NOTEST	0	0	0	0	1	1	no
XLOC_001331	XLOC_001331	CH17-472G23.1	chr1:120197084-120341871	Control_1_hr	Zn_1_hr	NOTEST	0	0	0	0	1	1	no
XLOC_001332	XLOC_001332	U1	chr1:120354986-120355148	Control_1_hr	Zn_1_hr	NOTEST	0.775531	0	#NAME?	0	1	1	no
XLOC_001333	XLOC_001333	NBPF8P	chr1:120436352-120467739	Control_1_hr	Zn_1_hr	OK	0.54659	0.576098	0.0758564	0.32782	0.57505	1	no
XLOC_001334	XLOC_001334	AC241952.1	chr1:120489624-120579190	Control_1_hr	Zn_1_hr	NOTEST	0	0	0	0	1	1	no
XLOC_001335	XLOC_001335	U2	chr1:120489624-120579190	Control_1_hr	Zn_1_hr	NOTEST	0	0	0	0	1	1	no
XLOC_001336	XLOC_001336	7SK	chr1:120670126-120670376	Control_1_hr	Zn_1_hr	NOTEST	0	0	0	0	1	1	no
XLOC_001337	XLOC_001337	AC253572.1	chr1:120723922-120793877	Control_1_hr	Zn_1_hr	NOTEST	0.0139481	0.0328411	1.23543	0	1	1	no
XLOC_001338	XLOC_001338	NBPF26	chr1:120805417-120841481	Control_1_hr	Zn_1_hr	NOTEST	0.100309	0.058925	-0.767497	0	1	1	no
XLOC_001339	XLOC_001339	PPIAL4B	chr1:120889745-120890405	Control_1_hr	Zn_1_hr	OK	3.69906	4.34173	0.231113	0.811196	0.1621	1	no
XLOC_001340	XLOC_001340	CH17-118O6.2	chr1:120913150-121052167	Control_1_hr	Zn_1_hr	NOTEST	0.0217804	0.214512	3.29996	0	1	1	no
XLOC_001341	XLOC_001341	RNVU1-20	chr1:120913150-121052167	Control_1_hr	Zn_1_hr	NOTEST	0	0	0	0	1	1	no
XLOC_001342	XLOC_001342	AC241377.1	chr1:120913150-121052167	Control_1_hr	Zn_1_hr	NOTEST	0	0	0	0	1	1	no
XLOC_001343	XLOC_001343	FCGR1B	chr1:121087344-121117257	Control_1_hr	Zn_1_hr	NOTEST	0	0	0	0	1	1	no
XLOC_001344	XLOC_001344	RP11-439A17.4	chr1:121118125-121146826	Control_1_hr	Zn_1_hr	NOTEST	0	0	0	0	1	1	no
XLOC_001345	XLOC_001345	SRGAP2C	chr1:121167645-121463129	Control_1_hr	Zn_1_hr	OK	0.803858	0.928493	0.20795	0.497679	0.27775	1	no
XLOC_001346	XLOC_001346	CH17-437K3.1	chr1:121167645-121463129	Control_1_hr	Zn_1_hr	NOTEST	0.0038534	0.0026283	-0.552004	0	1	1	no
XLOC_001347	XLOC_001347	AC244021.1	chr1:121167645-121463129	Control_1_hr	Zn_1_hr	NOTEST	0	0	0	0	1	1	no
XLOC_001348	XLOC_001348	RP11-343N15.2	chr1:121167645-121463129	Control_1_hr	Zn_1_hr	NOTEST	0	0	0	0	1	1	no
XLOC_001349	XLOC_001349	RP11-344P13.3	chr1:121494378-121510383	Control_1_hr	Zn_1_hr	NOTEST	0.174972	0.181705	0.0544784	0	1	1	no
XLOC_001350	XLOC_001350	EMBP1	chr1:121519111-121571892	Control_1_hr	Zn_1_hr	OK	0.419115	0.471461	0.169793	0.156299	0.7661	1	no
XLOC_001351	XLOC_001351	CH17-333M13.2	chr1:143343179-143343275	Control_1_hr	Zn_1_hr	NOTEST	0	0	0	0	1	1	no
XLOC_001352	XLOC_001352	CH17-333M13.1	chr1:143354190-143386122	Control_1_hr	Zn_1_hr	NOTEST	0	0	0	0	1	1	no
XLOC_001353	XLOC_001353	5S_rRNA	chr1:143439604-143439714	Control_1_hr	Zn_1_hr	NOTEST	0	0	0	0	1	1	no
XLOC_001354	XLOC_001354	NKAIN1P1	chr1:143461220-143498767	Control_1_hr	Zn_1_hr	NOTEST	0	0	0	0	1	1	no
XLOC_001355	XLOC_001355	RP11-763B22.7	chr1:143498784-143499102	Control_1_hr	Zn_1_hr	NOTEST	0	0	0	0	1	1	no
XLOC_001356	XLOC_001356	RP11-744H18.1	chr1:143541767-143572834	Control_1_hr	Zn_1_hr	NOTEST	0	0	0	0	1	1	no
XLOC_001357	XLOC_001357	PFN1P12	chr1:143595215-143635641	Control_1_hr	Zn_1_hr	NOTEST	0	0	0	0	1	1	no
XLOC_001358	XLOC_001358	AC239800.1	chr1:143729191-143729268	Control_1_hr	Zn_1_hr	NOTEST	0	0	0	0	1	1	no
XLOC_001359	XLOC_001359	RP11-403I13.5	chr1:143736065-143739506	Control_1_hr	Zn_1_hr	NOTEST	0.0827781	0.0397946	-1.05668	0	1	1	no
XLOC_001360	XLOC_001360	RP11-403I13.4	chr1:143745248-143757452	Control_1_hr	Zn_1_hr	NOTEST	0	0	0	0	1	1	no
XLOC_001361	XLOC_001361	FAM91A3P	chr1:143766539-143769083	Control_1_hr	Zn_1_hr	OK	0.521307	0.438971	-0.248006	-0.664866	0.24065	1	no
XLOC_001362	XLOC_001362	RP11-403I13.10	chr1:143784375-143784671	Control_1_hr	Zn_1_hr	NOTEST	0	0	0	0	1	1	no
XLOC_001363	XLOC_001363	RP11-403I13.7	chr1:143790009-143797108	Control_1_hr	Zn_1_hr	NOTEST	0	0.00156377	inf	0	1	1	no
XLOC_001364	XLOC_001364	FCGR1C	chr1:143874792-143934776	Control_1_hr	Zn_1_hr	NOTEST	0	0	0	0	1	1	no
XLOC_001365	XLOC_001365	RP5-998N21.7	chr1:143874792-143934776	Control_1_hr	Zn_1_hr	NOTEST	0	0	0	0	1	1	no
XLOC_001366	XLOC_001366	SRGAP2D	chr1:143975086-144068350	Control_1_hr	Zn_1_hr	NOTEST	0.0534269	0.09743	0.866799	0	1	1	no
XLOC_001367	XLOC_001367	IGKV1OR1-1	chr1:144085627-144086098	Control_1_hr	Zn_1_hr	NOTEST	0	0	0	0	1	1	no
XLOC_001368	XLOC_001368	CH17-248H7.2	chr1:144168751-144168850	Control_1_hr	Zn_1_hr	NOTEST	0	0	0	0	1	1	no
XLOC_001369	XLOC_001369	CH17-248H7.3	chr1:144179776-144211729	Control_1_hr	Zn_1_hr	NOTEST	0	0	0	0	1	1	no
XLOC_001370	XLOC_001370	5S_rRNA	chr1:144265216-144265326	Control_1_hr	Zn_1_hr	NOTEST	0	0	0	0	1	1	no
XLOC_001371	XLOC_001371	RNVU1-15	chr1:144412575-144412740	Control_1_hr	Zn_1_hr	NOTEST	0	1.03918	inf	0	1	1	no
XLOC_001372	XLOC_001372	RP11-763B22.3	chr1:144418112-144419192	Control_1_hr	Zn_1_hr	NOTEST	0.0962042	0.0279493	-1.78329	0	1	1	no
XLOC_001373	XLOC_001373	PFN1P7	chr1:144421385-144461674	Control_1_hr	Zn_1_hr	OK	1.83292	2.0223	0.141856	0.13501	0.8186	1	no
XLOC_001374	XLOC_001374	AC253578.1	chr1:144560450-144560527	Control_1_hr	Zn_1_hr	NOTEST	0	0	0	0	1	1	no
XLOC_001375	XLOC_001375	PPIAL4F	chr1:144592867-144593527	Control_1_hr	Zn_1_hr	NOTEST	0	0	0	0	1	1	no
XLOC_001376	XLOC_001376	RP11-289H16.1	chr1:144627191-145095528	Control_1_hr	Zn_1_hr	NOTEST	0	0	0	0	1	1	no
XLOC_001377	XLOC_001377	RP11-763B22.11	chr1:144627191-145095528	Control_1_hr	Zn_1_hr	NOTEST	0	0	0	0	1	1	no
XLOC_001378	XLOC_001378	RP3-365I19.2	chr1:144627191-145095528	Control_1_hr	Zn_1_hr	NOTEST	0	0	0	0	1	1	no
XLOC_001379	XLOC_001379	FAM72D	chr1:145095999-145112696	Control_1_hr	Zn_1_hr	OK	0.580806	0.763907	0.395341	1.19522	0.03615	1	no
XLOC_001380	XLOC_001380	AC241585.1	chr1:145132156-145132253	Control_1_hr	Zn_1_hr	NOTEST	0	0	0	0	1	1	no
XLOC_001381	XLOC_001381	U1	chr1:145164098-145216058	Control_1_hr	Zn_1_hr	NOTEST	0	0	0	0	1	1	no
XLOC_001382	XLOC_001382	AC241585.2	chr1:145164098-145216058	Control_1_hr	Zn_1_hr	NOTEST	0.0207379	0.00882592	-1.23245	0	1	1	no
XLOC_001383	XLOC_001383	RP11-289I10.2	chr1:145233000-145233519	Control_1_hr	Zn_1_hr	OK	42.999	44.3587	0.0449126	0.313781	0.5815	1	no
XLOC_001384	XLOC_001384	CH17-373J23.1	chr1:145281115-145281462	Control_1_hr	Zn_1_hr	NOTEST	0.0765589	0.214257	1.4847	0	1	1	no
XLOC_001385	XLOC_001385	PFN1P3	chr1:145407771-145408173	Control_1_hr	Zn_1_hr	NOTEST	0	0.112935	inf	0	1	1	no
XLOC_001386	XLOC_001386	CH17-262O2.2	chr1:145507443-145508607	Control_1_hr	Zn_1_hr	NOTEST	0	0	0	0	1	1	no
XLOC_001387	XLOC_001387	CH17-262O2.1	chr1:145509046-145520594	Control_1_hr	Zn_1_hr	NOTEST	0	0	0	0	1	1	no
XLOC_001388	XLOC_001388	GPR89A	chr1:145607989-145670648	Control_1_hr	Zn_1_hr	OK	1.85311	1.62602	-0.188604	-0.344905	0.47535	1	no
XLOC_001389	XLOC_001389	CD160	chr1:145719470-145824077	Control_1_hr	Zn_1_hr	NOTEST	0.0776201	0.0757054	-0.0360344	0	1	1	no
XLOC_001390	XLOC_001390	POLR3C	chr1:145824087-145842505	Control_1_hr	Zn_1_hr	OK	19.5198	19.2526	-0.019882	-0.110178	0.84325	1	no
XLOC_001391	XLOC_001391	NUDT17	chr1:145845628-145859836	Control_1_hr	Zn_1_hr	OK	3.60655	4.18013	0.212931	0.34629	0.5306	1	no
XLOC_001392	XLOC_001392	RP11-315I20.3	chr1:145891207-145910189	Control_1_hr	Zn_1_hr	NOTEST	0	0.036614	inf	0	1	1	no
XLOC_001393	XLOC_001393	GNRHR2	chr1:145919012-145978848	Control_1_hr	Zn_1_hr	NOTEST	0.316266	0.339272	0.101303	0	1	1	no
XLOC_001394	XLOC_001394	CH17-270A2.2,POLR3GL,RP11-315I20.1	chr1:145919012-145978848	Control_1_hr	Zn_1_hr	OK	9.22789	8.68717	-0.0871155	-0.143194	0.7592	1	no
XLOC_001395	XLOC_001395	CH17-270A2.1	chr1:145919012-145978848	Control_1_hr	Zn_1_hr	NOTEST	0	0	0	0	1	1	no
XLOC_001396	XLOC_001396	RP11-458D21.1	chr1:146052565-146061948	Control_1_hr	Zn_1_hr	OK	0.454091	0.456102	0.00637331	0.00690429	0.98555	1	no
XLOC_001397	XLOC_001397	CH17-353B19.1	chr1:146235805-146237807	Control_1_hr	Zn_1_hr	NOTEST	0.00735103	0.00783475	0.0919414	0	1	1	no
XLOC_001398	XLOC_001398	RNU6-1071P	chr1:146288595-146288696	Control_1_hr	Zn_1_hr	NOTEST	0	0	0	0	1	1	no
XLOC_001399	XLOC_001399	NUDT4P2	chr1:146298169-146298715	Control_1_hr	Zn_1_hr	NOTEST	0	0	0	0	1	1	no
XLOC_001400	XLOC_001400	RNU1-1	chr1:146376806-146376970	Control_1_hr	Zn_1_hr	NOTEST	0	0	0	0	1	1	no
XLOC_001401	XLOC_001401	U1	chr1:146409902-146410062	Control_1_hr	Zn_1_hr	NOTEST	1.12949	0	#NAME?	0	1	1	no
XLOC_001402	XLOC_001402	RP11-640M9.4	chr1:146459448-146461859	Control_1_hr	Zn_1_hr	NOTEST	0	0	0	0	1	1	no
XLOC_001403	XLOC_001403	CH17-408M7.1	chr1:146514470-146525289	Control_1_hr	Zn_1_hr	NOTEST	0	0	0	0	1	1	no
XLOC_001404	XLOC_001404	HYDIN2	chr1:146547366-146914294	Control_1_hr	Zn_1_hr	NOTEST	0	0.00269455	inf	0	1	1	no
XLOC_001405	XLOC_001405	MIR1302-1	chr1:146547366-146914294	Control_1_hr	Zn_1_hr	NOTEST	0	0	0	0	1	1	no
XLOC_001406	XLOC_001406	NBPF12	chr1:146938743-146996202	Control_1_hr	Zn_1_hr	OK	1.04318	0.987587	-0.0790115	-0.444374	0.39935	1	no
XLOC_001407	XLOC_001407	RP11-325P15.1	chr1:147021319-147124525	Control_1_hr	Zn_1_hr	NOTEST	0.253151	0.154837	-0.709246	0	1	1	no
XLOC_001408	XLOC_001408	RNVU1-8	chr1:147021319-147124525	Control_1_hr	Zn_1_hr	NOTEST	0	0	0	0	1	1	no
XLOC_001409	XLOC_001409	CHD1L,RP11-337C18.10,RP11-337C18.8	chr1:147172770-147517875	Control_1_hr	Zn_1_hr	OK	28.6441	27.5025	-0.058679	-0.199415	0.69445	1	no
XLOC_001410	XLOC_001410	RP11-337C18.9	chr1:147172770-147517875	Control_1_hr	Zn_1_hr	NOTEST	0.355148	0.346297	-0.036412	0	1	1	no
XLOC_001411	XLOC_001411	PDIA3P1	chr1:147172770-147517875	Control_1_hr	Zn_1_hr	OK	76.0786	77.6665	0.0298018	0.140636	0.8095	1	no
XLOC_001412	XLOC_001412	RPL7AP15	chr1:147172770-147517875	Control_1_hr	Zn_1_hr	NOTEST	0	0	0	0	1	1	no
XLOC_001413	XLOC_001413	RP11-337C18.4	chr1:147172770-147517875	Control_1_hr	Zn_1_hr	OK	2.59221	2.73408	0.0768722	0.0441039	0.9377	1	no
XLOC_001414	XLOC_001414	OR13Z1P	chr1:147172770-147517875	Control_1_hr	Zn_1_hr	NOTEST	0	0	0	0	1	1	no
XLOC_001415	XLOC_001415	OR13Z2P	chr1:147172770-147517875	Control_1_hr	Zn_1_hr	NOTEST	0	0	0	0	1	1	no
XLOC_001416	XLOC_001416	OR13Z3P	chr1:147172770-147517875	Control_1_hr	Zn_1_hr	NOTEST	0	0	0	0	1	1	no
XLOC_001417	XLOC_001417	BCL9	chr1:147541411-147626216	Control_1_hr	Zn_1_hr	OK	4.04968	3.5412	-0.193568	-0.552262	0.26605	1	no
XLOC_001418	XLOC_001418	Metazoa_SRP	chr1:147689255-147689537	Control_1_hr	Zn_1_hr	NOTEST	0	0	0	0	1	1	no
XLOC_001419	XLOC_001419	RP11-533N14.3	chr1:147697793-147699335	Control_1_hr	Zn_1_hr	NOTEST	0	0	0	0	1	1	no
XLOC_001420	XLOC_001420	RP11-433J22.2	chr1:147756198-147773362	Control_1_hr	Zn_1_hr	NOTEST	0	0	0	0	1	1	no
XLOC_001421	XLOC_001421	RP11-433J22.3	chr1:147777589-147788953	Control_1_hr	Zn_1_hr	NOTEST	0	0	0	0	1	1	no
XLOC_001422	XLOC_001422	RP11-314N2.2	chr1:147840961-147842359	Control_1_hr	Zn_1_hr	NOTEST	0	0	0	0	1	1	no
XLOC_001423	XLOC_001423	GJA8	chr1:147907955-147909257	Control_1_hr	Zn_1_hr	NOTEST	0.0119094	0.028002	1.23343	0	1	1	no
XLOC_001424	XLOC_001424	GPR89B	chr1:147928392-147993521	Control_1_hr	Zn_1_hr	OK	0.449084	0.379699	-0.242129	-0.31062	0.4444	1	no
XLOC_001425	XLOC_001425	XXyac-YX155B6.7	chr1:147993861-148014956	Control_1_hr	Zn_1_hr	NOTEST	0.163871	0.0921538	-0.830445	0	1	1	no
XLOC_001426	XLOC_001426	RP11-94I2.4	chr1:148021849-148025931	Control_1_hr	Zn_1_hr	NOTEST	0	0	0	0	1	1	no
XLOC_001427	XLOC_001427	PDE4DIP1	chr1:148080597-148093883	Control_1_hr	Zn_1_hr	NOTEST	0	0	0	0	1	1	no
XLOC_001428	XLOC_001428	PFN1P4	chr1:148102045-148152322	Control_1_hr	Zn_1_hr	NOTEST	0	0.0376453	inf	0	1	1	no
XLOC_001429	XLOC_001429	ABHD17AP1	chr1:148102045-148152322	Control_1_hr	Zn_1_hr	OK	3.16006	3.74192	0.243827	0.819651	0.1385	1	no
XLOC_001430	XLOC_001430	XXyac-YX155B6.5	chr1:148159212-148254985	Control_1_hr	Zn_1_hr	NOTEST	0	0	0	0	1	1	no
XLOC_001431	XLOC_001431	RNA5SP57	chr1:148159212-148254985	Control_1_hr	Zn_1_hr	NOTEST	0	0	0	0	1	1	no
XLOC_001432	XLOC_001432	RP11-301M17.2	chr1:148159212-148254985	Control_1_hr	Zn_1_hr	NOTEST	0	0	0	0	1	1	no
XLOC_001433	XLOC_001433	RP11-301M17.1	chr1:148159212-148254985	Control_1_hr	Zn_1_hr	NOTEST	0	0	0	0	1	1	no
XLOC_001434	XLOC_001434	RNU1-120P	chr1:148263475-148263632	Control_1_hr	Zn_1_hr	NOTEST	0	0	0	0	1	1	no
XLOC_001435	XLOC_001435	RP11-495P10.5	chr1:148290889-148297556	Control_1_hr	Zn_1_hr	NOTEST	0.0273592	0.00457852	-2.57907	0	1	1	no
XLOC_001436	XLOC_001436	RP11-495P10.3	chr1:148328998-148344636	Control_1_hr	Zn_1_hr	NOTEST	0	0	0	0	1	1	no
XLOC_001437	XLOC_001437	Y_RNA	chr1:148328998-148344636	Control_1_hr	Zn_1_hr	NOTEST	0	0	0	0	1	1	no
XLOC_001438	XLOC_001438	MIR6077	chr1:148362994-148460150	Control_1_hr	Zn_1_hr	NOTEST	0	0	0	0	1	1	no
XLOC_001439	XLOC_001439	RNVU1-3	chr1:148362994-148460150	Control_1_hr	Zn_1_hr	NOTEST	0	0	0	0	1	1	no
XLOC_001440	XLOC_001440	RP11-495P10.1	chr1:148362994-148460150	Control_1_hr	Zn_1_hr	NOTEST	0.0256494	0.0581215	1.18015	0	1	1	no
XLOC_001441	XLOC_001441	RP11-495P10.10	chr1:148362994-148460150	Control_1_hr	Zn_1_hr	OK	1.68107	1.63142	-0.0432501	-0.139404	0.7981	1	no
XLOC_001442	XLOC_001442	AC245100.1	chr1:148362994-148460150	Control_1_hr	Zn_1_hr	OK	0.507659	0.434655	-0.223986	-0.245635	0.6457	1	no
XLOC_001443	XLOC_001443	U1	chr1:148522600-148522765	Control_1_hr	Zn_1_hr	NOTEST	0	0	0	0	1	1	no
XLOC_001444	XLOC_001444	RNU6-1171P	chr1:148739378-148739479	Control_1_hr	Zn_1_hr	NOTEST	0	0	0	0	1	1	no
XLOC_001445	XLOC_001445	NUDT4P1	chr1:148748952-148749498	Control_1_hr	Zn_1_hr	NOTEST	0	0	0	0	1	1	no
XLOC_001446	XLOC_001446	RP4-725K1.1	chr1:148795796-148796325	Control_1_hr	Zn_1_hr	NOTEST	0	0	0	0	1	1	no
XLOC_001447	XLOC_001447	PDE4DIP	chr1:148808180-149048286	Control_1_hr	Zn_1_hr	OK	2.1424	1.83101	-0.226589	-0.473663	0.1598	1	no
XLOC_001448	XLOC_001448	RP4-791M13.3	chr1:149048575-149051273	Control_1_hr	Zn_1_hr	NOTEST	0	0	0	0	1	1	no
XLOC_001449	XLOC_001449	CH17-189H20.1	chr1:149176021-149321732	Control_1_hr	Zn_1_hr	OK	0.399619	0.605354	0.599152	0.562636	0.1541	1	no
XLOC_001450	XLOC_001450	RP11-326G21.1	chr1:149176021-149321732	Control_1_hr	Zn_1_hr	NOTEST	0	0.0212405	inf	0	1	1	no
XLOC_001451	XLOC_001451	7SK	chr1:149176021-149321732	Control_1_hr	Zn_1_hr	NOTEST	0	0	0	0	1	1	no
XLOC_001452	XLOC_001452	SEC22B	chr1:149345660-149357612	Control_1_hr	Zn_1_hr	NOTEST	0	0	0	0	1	1	no
XLOC_001453	XLOC_001453	NBPF19	chr1:149390622-149556361	Control_1_hr	Zn_1_hr	OK	0.995388	0.903726	-0.139374	-0.648832	0.2309	1	no
XLOC_001454	XLOC_001454	PPIAL4C	chr1:149583864-149584464	Control_1_hr	Zn_1_hr	NOTEST	0	0.0194146	inf	0	1	1	no
XLOC_001455	XLOC_001455	LINC00869	chr1:149606333-149747812	Control_1_hr	Zn_1_hr	OK	0.534967	0.52943	-0.0150098	-0.0121733	0.97125	1	no
XLOC_001456	XLOC_001456	RP11-353N4.6	chr1:149606333-149747812	Control_1_hr	Zn_1_hr	NOTEST	0	0	0	0	1	1	no
XLOC_001457	XLOC_001457	U1	chr1:149606333-149747812	Control_1_hr	Zn_1_hr	NOTEST	0	0.527013	inf	0	1	1	no
XLOC_001458	XLOC_001458	FAM231D	chr1:149606333-149747812	Control_1_hr	Zn_1_hr	NOTEST	0	0	0	0	1	1	no
XLOC_001459	XLOC_001459	FCGR1A	chr1:149782670-149812373	Control_1_hr	Zn_1_hr	NOTEST	0	0	0	0	1	1	no
XLOC_001460	XLOC_001460	HIST2H4A	chr1:149832658-149841193	Control_1_hr	Zn_1_hr	NOTEST	0	0.00671255	inf	0	1	1	no
XLOC_001461	XLOC_001461	AC239868.3	chr1:149842187-149886652	Control_1_hr	Zn_1_hr	NOTEST	0	0	0	0	1	1	no
XLOC_001462	XLOC_001462	HIST2H2BD	chr1:149842187-149886652	Control_1_hr	Zn_1_hr	NOTEST	0	0.134085	inf	0	1	1	no
XLOC_001463	XLOC_001463	RP11-196G18.24	chr1:149842187-149886652	Control_1_hr	Zn_1_hr	OK	0.703962	0.377439	-0.899255	-0.60988	0.28855	1	no
XLOC_001464	XLOC_001464	HIST2H2AA4	chr1:149842187-149886652	Control_1_hr	Zn_1_hr	NOTEST	0	0	0	0	1	1	no
XLOC_001465	XLOC_001465	HIST2H3A	chr1:149842187-149886652	Control_1_hr	Zn_1_hr	NOTEST	0	0	0	0	1	1	no
XLOC_001466	XLOC_001466	RP11-196G18.23	chr1:149842187-149886652	Control_1_hr	Zn_1_hr	NOTEST	0	0	0	0	1	1	no
XLOC_001467	XLOC_001467	HIST2H2AC	chr1:149886974-149887364	Control_1_hr	Zn_1_hr	OK	3.14078	3.26357	0.0553282	0.110596	0.8467	1	no
XLOC_001468	XLOC_001468	BOLA1	chr1:149887523-149900798	Control_1_hr	Zn_1_hr	OK	20.5361	22.4273	0.127095	0.866621	0.13035	1	no
XLOC_001469	XLOC_001469	RP11-458I7.1	chr1:150053863-150055034	Control_1_hr	Zn_1_hr	NOTEST	0.0192923	0.0500579	1.37557	0	1	1	no
XLOC_001470	XLOC_001470	VPS45	chr1:150067292-150145327	Control_1_hr	Zn_1_hr	OK	15.2018	17.492	0.202451	0.892054	0.11205	1	no
XLOC_001471	XLOC_001471	PLEKHO1	chr1:150149182-150164720	Control_1_hr	Zn_1_hr	OK	4.6465	4.31628	-0.106357	-0.350608	0.5274	1	no
XLOC_001472	XLOC_001472	RN7SL480P	chr1:150211631-150211925	Control_1_hr	Zn_1_hr	NOTEST	0.107251	0	#NAME?	0	1	1	no
XLOC_001473	XLOC_001473	RNU2-17P	chr1:150236966-150237156	Control_1_hr	Zn_1_hr	NOTEST	0	0	0	0	1	1	no
XLOC_001474	XLOC_001474	CA14	chr1:150255094-150265078	Control_1_hr	Zn_1_hr	NOTEST	0.159081	0.0750751	-1.08336	0	1	1	no
XLOC_001475	XLOC_001475	C1orf54	chr1:150265398-150280916	Control_1_hr	Zn_1_hr	OK	0.473549	0.477726	0.0126697	0.00471887	0.99265	1	no
XLOC_001476	XLOC_001476	CIART	chr1:150282542-150287093	Control_1_hr	Zn_1_hr	OK	0.816219	0.683307	-0.256424	-0.3845	0.4146	1	no
XLOC_001477	XLOC_001477	MRPS21	chr1:150293719-150308979	Control_1_hr	Zn_1_hr	OK	44.3143	43.4267	-0.0291905	-0.18671	0.7433	1	no
XLOC_001478	XLOC_001478	PRPF3	chr1:150321475-150353195	Control_1_hr	Zn_1_hr	OK	27.7726	26.6835	-0.0577101	-0.328318	0.56405	1	no
XLOC_001479	XLOC_001479	RPRD2	chr1:150363090-150476566	Control_1_hr	Zn_1_hr	OK	9.5536	9.55295	-9.80108e-05	-0.000595515	0.99935	1	no
XLOC_001480	XLOC_001480	TARS2	chr1:150487363-150507609	Control_1_hr	Zn_1_hr	OK	18.2741	17.1985	-0.0875187	-0.425401	0.43985	1	no
XLOC_001481	XLOC_001481	ECM1	chr1:150508061-150513789	Control_1_hr	Zn_1_hr	OK	3.06682	3.36966	0.13586	0.706638	0.18475	1	no
XLOC_001482	XLOC_001482	FALEC	chr1:150515756-150518032	Control_1_hr	Zn_1_hr	NOTEST	0.21794	0.118181	-0.882931	0	1	1	no
XLOC_001483	XLOC_001483	ADAMTSL4,MIR4257	chr1:150548561-150579738	Control_1_hr	Zn_1_hr	OK	0.930067	1.03497	0.154176	0.0947419	0.8449	1	no
XLOC_001484	XLOC_001484	RNU6-1042P	chr1:150698059-150720888	Control_1_hr	Zn_1_hr	NOTEST	0	0	0	0	1	1	no
XLOC_001485	XLOC_001485	RP11-363I22.3	chr1:150780271-150780644	Control_1_hr	Zn_1_hr	NOTEST	0.200683	0.266285	0.408056	0	1	1	no
XLOC_001486	XLOC_001486	UBE2D3P3	chr1:150796207-150808323	Control_1_hr	Zn_1_hr	NOTEST	0	0	0	0	1	1	no
XLOC_001487	XLOC_001487	CYCSP51	chr1:150903895-150904213	Control_1_hr	Zn_1_hr	NOTEST	0.184233	0.0611657	-1.59074	0	1	1	no
XLOC_001488	XLOC_001488	SETDB1	chr1:150926262-150975534	Control_1_hr	Zn_1_hr	OK	12.5345	10.8032	-0.214439	-0.276637	0.4941	1	no
XLOC_001489	XLOC_001489	RP11-316M1.12	chr1:150926262-150975534	Control_1_hr	Zn_1_hr	OK	3.96398	2.43766	-0.701454	-0.304346	0.67975	1	no
XLOC_001490	XLOC_001490	RP11-316M1.3	chr1:150926262-150975534	Control_1_hr	Zn_1_hr	NOTEST	0.0685432	0	#NAME?	0	1	1	no
XLOC_001491	XLOC_001491	ANXA9	chr1:150982016-150995634	Control_1_hr	Zn_1_hr	OK	2.15247	1.79163	-0.264717	-0.72889	0.17385	1	no
XLOC_001492	XLOC_001492	PRUNE	chr1:151008419-151035713	Control_1_hr	Zn_1_hr	OK	6.68841	6.06968	-0.140043	-0.73337	0.18755	1	no
XLOC_001493	XLOC_001493	BNIPL	chr1:151036569-151047600	Control_1_hr	Zn_1_hr	NOTEST	0.175282	0.105547	-0.731793	0	1	1	no
XLOC_001494	XLOC_001494	C1orf56	chr1:151047739-151070325	Control_1_hr	Zn_1_hr	OK	5.85771	5.71212	-0.0363118	-0.0550336	0.90815	1	no
XLOC_001495	XLOC_001495	MLLT11	chr1:151047739-151070325	Control_1_hr	Zn_1_hr	OK	15.6937	15.8342	0.0128601	0.056621	0.92345	1	no
XLOC_001496	XLOC_001496	GABPB2	chr1:151070577-151125542	Control_1_hr	Zn_1_hr	OK	2.0542	1.95813	-0.0690951	-0.179479	0.7501	1	no
XLOC_001497	XLOC_001497	SCNM1,TNFAIP8L2	chr1:151156628-151195321	Control_1_hr	Zn_1_hr	OK	25.495	24.1272	-0.0795509	-0.246257	0.67555	1	no
XLOC_001498	XLOC_001498	PIP5K1A	chr1:151197948-151249536	Control_1_hr	Zn_1_hr	OK	26.2086	30.2329	0.206079	0.819597	0.1466	1	no
XLOC_001499	XLOC_001499	PSMD4	chr1:151254702-151267479	Control_1_hr	Zn_1_hr	OK	78.1941	79.5601	0.0249856	0.109631	0.84585	1	no
XLOC_001500	XLOC_001500	ZNF687	chr1:151280023-151327715	Control_1_hr	Zn_1_hr	OK	11.0689	11.9404	0.109333	0.368035	0.51165	1	no
XLOC_001501	XLOC_001501	RP11-126K1.9	chr1:151327948-151328429	Control_1_hr	Zn_1_hr	NOTEST	0	0.132338	inf	0	1	1	no
XLOC_001502	XLOC_001502	RP11-126K1.8	chr1:151340639-151348027	Control_1_hr	Zn_1_hr	NOTEST	0	0	0	0	1	1	no
XLOC_001503	XLOC_001503	RP11-126K1.6	chr1:151340639-151348027	Control_1_hr	Zn_1_hr	OK	1.02717	0.717193	-0.518242	-0.239721	0.7025	1	no
XLOC_001504	XLOC_001504	PSMB4	chr1:151399533-151401944	Control_1_hr	Zn_1_hr	OK	241.434	245.427	0.023666	0.157164	0.7816	1	no
XLOC_001505	XLOC_001505	RNY4P25	chr1:151402723-151459465	Control_1_hr	Zn_1_hr	NOTEST	18.8229	0	#NAME?	0	1	1	no
XLOC_001506	XLOC_001506	CGN	chr1:151510509-151538692	Control_1_hr	Zn_1_hr	OK	1.45751	1.28945	-0.176751	-0.337485	0.43235	1	no
XLOC_001507	XLOC_001507	TUFT1	chr1:151540304-151583583	Control_1_hr	Zn_1_hr	OK	13.5628	14.6678	0.112993	0.625364	0.26615	1	no
XLOC_001508	XLOC_001508	RP11-74C1.4	chr1:151540304-151583583	Control_1_hr	Zn_1_hr	NOTEST	0.128685	0.182477	0.503867	0	1	1	no
XLOC_001509	XLOC_001509	MIR554	chr1:151540304-151583583	Control_1_hr	Zn_1_hr	NOTEST	0	0	0	0	1	1	no
XLOC_001510	XLOC_001510	RP11-74C1.2	chr1:151540304-151583583	Control_1_hr	Zn_1_hr	NOTEST	0.0834981	0.337841	2.01653	0	1	1	no
XLOC_001511	XLOC_001511	SNX27	chr1:151612037-151699091	Control_1_hr	Zn_1_hr	OK	6.85932	6.89938	0.00840225	0.0434171	0.933	1	no
XLOC_001512	XLOC_001512	RNU6-1062P	chr1:151612037-151699091	Control_1_hr	Zn_1_hr	NOTEST	0	0	0	0	1	1	no
XLOC_001513	XLOC_001513	RP11-98D18.1	chr1:151701025-151729805	Control_1_hr	Zn_1_hr	NOTEST	0	0	0	0	1	1	no
XLOC_001514	XLOC_001514	RIIAD1	chr1:151701025-151729805	Control_1_hr	Zn_1_hr	NOTEST	0	0.10317	inf	0	1	1	no
XLOC_001515	XLOC_001515	RP11-98D18.15	chr1:151755540-151794402	Control_1_hr	Zn_1_hr	NOTEST	0.0538148	0.0662066	0.298972	0	1	1	no
XLOC_001516	XLOC_001516	RP11-98D18.7	chr1:151755540-151794402	Control_1_hr	Zn_1_hr	NOTEST	0	0.0331231	inf	0	1	1	no
XLOC_001517	XLOC_001517	OAZ3,RP11-98D18.2	chr1:151755540-151794402	Control_1_hr	Zn_1_hr	OK	2.21814	1.95074	-0.185328	-0.111462	0.83505	1	no
XLOC_001518	XLOC_001518	RP11-98D18.9	chr1:151755540-151794402	Control_1_hr	Zn_1_hr	OK	1.15553	0.544073	-1.08669	-0.465201	0.58915	1	no
XLOC_001519	XLOC_001519	RP11-98D18.17	chr1:151798053-151798602	Control_1_hr	Zn_1_hr	NOTEST	0.105265	0.0884812	-0.250588	0	1	1	no
XLOC_001520	XLOC_001520	AL450992.2	chr1:151841876-151853697	Control_1_hr	Zn_1_hr	NOTEST	0	0	0	0	1	1	no
XLOC_001521	XLOC_001521	AL450992.6,AL591893.1	chr1:151994530-152047907	Control_1_hr	Zn_1_hr	NOTEST	0.0138094	0.0482809	1.8058	0	1	1	no
XLOC_001522	XLOC_001522	SPTLC1P4	chr1:152077951-152078211	Control_1_hr	Zn_1_hr	OK	0.938503	0.926497	-0.0185746	-0.0105603	0.9161	1	no
XLOC_001523	XLOC_001523	AL589986.2	chr1:152122533-152445456	Control_1_hr	Zn_1_hr	NOTEST	0	0	0	0	1	1	no
XLOC_001524	XLOC_001524	FLG-AS1	chr1:152122533-152445456	Control_1_hr	Zn_1_hr	OK	0.373153	0.249585	-0.580233	-0.272845	0.30875	1	no
XLOC_001525	XLOC_001525	RP11-107M16.2	chr1:152122533-152445456	Control_1_hr	Zn_1_hr	NOTEST	0.14607	0.304427	1.05944	0	1	1	no
XLOC_001526	XLOC_001526	HMGN3P1	chr1:152122533-152445456	Control_1_hr	Zn_1_hr	OK	40.0934	33.9447	-0.240179	-0.483132	0.36485	1	no
XLOC_001527	XLOC_001527	LCE3C,LCE5A	chr1:152510843-152601086	Control_1_hr	Zn_1_hr	NOTEST	0	0	0	0	1	1	no
XLOC_001528	XLOC_001528	CRCT1	chr1:152510843-152601086	Control_1_hr	Zn_1_hr	NOTEST	0.0246035	0.0489498	0.992441	0	1	1	no
XLOC_001529	XLOC_001529	LCE3B	chr1:152613810-152614098	Control_1_hr	Zn_1_hr	NOTEST	0	0	0	0	1	1	no
XLOC_001530	XLOC_001530	LINC00302	chr1:152655476-152656804	Control_1_hr	Zn_1_hr	NOTEST	0	0	0	0	1	1	no
XLOC_001531	XLOC_001531	LCE2D	chr1:152663395-152664659	Control_1_hr	Zn_1_hr	NOTEST	0	0	0	0	1	1	no
XLOC_001532	XLOC_001532	LCE2C	chr1:152675294-152676574	Control_1_hr	Zn_1_hr	NOTEST	0	0	0	0	1	1	no
XLOC_001533	XLOC_001533	LCE2B	chr1:152686122-152687401	Control_1_hr	Zn_1_hr	NOTEST	0	0	0	0	1	1	no
XLOC_001534	XLOC_001534	LCE2A	chr1:152698363-152699442	Control_1_hr	Zn_1_hr	NOTEST	0	0	0	0	1	1	no
XLOC_001535	XLOC_001535	LCE4A	chr1:152708159-152709491	Control_1_hr	Zn_1_hr	NOTEST	0	0	0	0	1	1	no
XLOC_001536	XLOC_001536	C1orf68	chr1:152719521-152720470	Control_1_hr	Zn_1_hr	NOTEST	0	0	0	0	1	1	no
XLOC_001537	XLOC_001537	LCE1B,RP1-43O17.1	chr1:152737517-152813109	Control_1_hr	Zn_1_hr	NOTEST	0	0	0	0	1	1	no
XLOC_001538	XLOC_001538	RP1-43O17.2	chr1:152737517-152813109	Control_1_hr	Zn_1_hr	NOTEST	0	0	0	0	1	1	no
XLOC_001539	XLOC_001539	KPRP	chr1:152737517-152813109	Control_1_hr	Zn_1_hr	NOTEST	0.0113058	0.0266254	1.23574	0	1	1	no
XLOC_001540	XLOC_001540	LCE1F	chr1:152737517-152813109	Control_1_hr	Zn_1_hr	NOTEST	0	0	0	0	1	1	no
XLOC_001541	XLOC_001541	LCE1E	chr1:152737517-152813109	Control_1_hr	Zn_1_hr	NOTEST	0	0.00944517	inf	0	1	1	no
XLOC_001542	XLOC_001542	LCE1D	chr1:152737517-152813109	Control_1_hr	Zn_1_hr	NOTEST	0	0	0	0	1	1	no
XLOC_001543	XLOC_001543	LCE1A	chr1:152827472-152827894	Control_1_hr	Zn_1_hr	NOTEST	0	0	0	0	1	1	no
XLOC_001544	XLOC_001544	LCE6A	chr1:152842867-152843983	Control_1_hr	Zn_1_hr	NOTEST	0	0	0	0	1	1	no
XLOC_001545	XLOC_001545	SMCP	chr1:152878316-152885047	Control_1_hr	Zn_1_hr	NOTEST	0	0	0	0	1	1	no
XLOC_001546	XLOC_001546	IVL	chr1:152908544-152911886	Control_1_hr	Zn_1_hr	NOTEST	0.0159928	0.0332581	1.05629	0	1	1	no
XLOC_001547	XLOC_001547	SPRR4	chr1:152970665-152972574	Control_1_hr	Zn_1_hr	NOTEST	0	0	0	0	1	1	no
XLOC_001548	XLOC_001548	SPRR1A	chr1:152985230-152985500	Control_1_hr	Zn_1_hr	NOTEST	0	0	0	0	1	1	no
XLOC_001549	XLOC_001549	SPRR3	chr1:153001746-153003856	Control_1_hr	Zn_1_hr	NOTEST	0	0.0184184	inf	0	1	1	no
XLOC_001550	XLOC_001550	RP1-20N18.4	chr1:153023961-153024260	Control_1_hr	Zn_1_hr	NOTEST	0	0	0	0	1	1	no
XLOC_001551	XLOC_001551	SPRR1B	chr1:153031201-153032900	Control_1_hr	Zn_1_hr	NOTEST	0	0	0	0	1	1	no
XLOC_001552	XLOC_001552	RP1-140J1.1	chr1:153174517-153191676	Control_1_hr	Zn_1_hr	NOTEST	0	0	0	0	1	1	no
XLOC_001553	XLOC_001553	LELP1	chr1:153203442-153205120	Control_1_hr	Zn_1_hr	NOTEST	0	0	0	0	1	1	no
XLOC_001554	XLOC_001554	PRR9	chr1:153217583-153219317	Control_1_hr	Zn_1_hr	NOTEST	0	0	0	0	1	1	no
XLOC_001555	XLOC_001555	RP1-140J1.4	chr1:153225079-153226006	Control_1_hr	Zn_1_hr	NOTEST	0.103193	0.121197	0.232013	0	1	1	no
XLOC_001556	XLOC_001556	LOR	chr1:153259699-153262122	Control_1_hr	Zn_1_hr	NOTEST	0.012148	0	#NAME?	0	1	1	no
XLOC_001557	XLOC_001557	RNU6-160P	chr1:153330119-153348840	Control_1_hr	Zn_1_hr	NOTEST	0	0	0	0	1	1	no
XLOC_001558	XLOC_001558	S100A9	chr1:153357853-153361027	Control_1_hr	Zn_1_hr	NOTEST	0	0.0205771	inf	0	1	1	no
XLOC_001559	XLOC_001559	S100A7A	chr1:153416523-153423225	Control_1_hr	Zn_1_hr	NOTEST	0	0.00192899	inf	0	1	1	no
XLOC_001560	XLOC_001560	BX470102.3	chr1:153533602-153536244	Control_1_hr	Zn_1_hr	OK	1.2013	2.12749	0.824549	0.149863	0.61605	1	no
XLOC_001561	XLOC_001561	S100A1	chr1:153618786-153646306	Control_1_hr	Zn_1_hr	OK	0.814146	0.67858	-0.262768	-0.116408	0.76395	1	no
XLOC_001562	XLOC_001562	CHTOP	chr1:153618786-153646306	Control_1_hr	Zn_1_hr	OK	51.7933	49.8699	-0.0545969	-0.27569	0.6393	1	no
XLOC_001563	XLOC_001563	SNAPIN	chr1:153658653-153671048	Control_1_hr	Zn_1_hr	OK	39.5822	39.5042	-0.00284458	-0.00667017	0.9908	1	no
XLOC_001564	XLOC_001564	NPR1	chr1:153678636-153693992	Control_1_hr	Zn_1_hr	OK	0.994359	0.980833	-0.0197591	-0.0531373	0.9156	1	no
XLOC_001565	XLOC_001565	RN7SL372P	chr1:153704087-153704385	Control_1_hr	Zn_1_hr	NOTEST	0	0	0	0	1	1	no
XLOC_001566	XLOC_001566	INTS3,SLC27A3	chr1:153728066-153780157	Control_1_hr	Zn_1_hr	NOTEST	0.00467802	0.00473321	0.0169186	0	1	1	no
XLOC_001567	XLOC_001567	RP11-216N14.5	chr1:153795172-153802091	Control_1_hr	Zn_1_hr	NOTEST	0	0	0	0	1	1	no
XLOC_001568	XLOC_001568	RP11-759F5.1	chr1:153804724-153922975	Control_1_hr	Zn_1_hr	NOTEST	0	0.0903684	inf	0	1	1	no
XLOC_001569	XLOC_001569	RP11-422P24.10	chr1:153959098-153977688	Control_1_hr	Zn_1_hr	OK	0.83986	0.730396	-0.201471	-0.0332285	0.91195	1	no
XLOC_001570	XLOC_001570	CREB3L4	chr1:153959098-153977688	Control_1_hr	Zn_1_hr	OK	6.26222	6.28274	0.00471882	0.00508429	0.99175	1	no
XLOC_001571	XLOC_001571	RP11-422P24.11	chr1:153977742-153979160	Control_1_hr	Zn_1_hr	OK	0.410114	0.266469	-0.622055	-1.00225	0.1074	1	no
XLOC_001572	XLOC_001572	RPS27	chr1:153990758-153992150	Control_1_hr	Zn_1_hr	OK	8.61723	7.84853	-0.134801	-0.535535	0.33245	1	no
XLOC_001573	XLOC_001573	RP11-422P24.9	chr1:153992684-154155116	Control_1_hr	Zn_1_hr	OK	1.1009	1.64314	0.57777	0.598738	0.3354	1	no
XLOC_001574	XLOC_001574	RPS7P2	chr1:153992684-154155116	Control_1_hr	Zn_1_hr	NOTEST	0	0.0190864	inf	0	1	1	no
XLOC_001575	XLOC_001575	SNORA58,UBAP2L	chr1:154206705-154271510	Control_1_hr	Zn_1_hr	OK	86.3072	88.6969	0.0394031	0.126133	0.8246	1	no
XLOC_001576	XLOC_001576	AL590431.1	chr1:154206705-154271510	Control_1_hr	Zn_1_hr	NOTEST	0	0	0	0	1	1	no
XLOC_001577	XLOC_001577	HAX1	chr1:154272510-154275875	Control_1_hr	Zn_1_hr	OK	50.6042	50.909	0.00866325	0.0530566	0.92685	1	no
XLOC_001578	XLOC_001578	SNORD59	chr1:154288459-154288527	Control_1_hr	Zn_1_hr	NOTEST	0	0	0	0	1	1	no
XLOC_001579	XLOC_001579	RNU6-239P	chr1:154295502-154295601	Control_1_hr	Zn_1_hr	NOTEST	0	0	0	0	1	1	no
XLOC_001580	XLOC_001580	RNU6-121P	chr1:154297649-154297748	Control_1_hr	Zn_1_hr	NOTEST	0	0	0	0	1	1	no
XLOC_001581	XLOC_001581	RP11-137P24.5	chr1:154312461-154313084	Control_1_hr	Zn_1_hr	NOTEST	0	0	0	0	1	1	no
XLOC_001582	XLOC_001582	AQP10	chr1:154321089-154325325	Control_1_hr	Zn_1_hr	NOTEST	0.00830944	0	#NAME?	0	1	1	no
XLOC_001583	XLOC_001583	ATP8B2	chr1:154325552-154351307	Control_1_hr	Zn_1_hr	OK	11.8604	12.4069	0.0649887	0.193897	0.67155	1	no
XLOC_001584	XLOC_001584	IL6R	chr1:154402327-154469450	Control_1_hr	Zn_1_hr	OK	2.86285	3.46648	0.27602	0.74251	0.1506	1	no
XLOC_001585	XLOC_001585	RP11-350G8.9	chr1:154469771-154502113	Control_1_hr	Zn_1_hr	NOTEST	0.0207572	0	#NAME?	0	1	1	no
XLOC_001586	XLOC_001586	TDRD10	chr1:154502218-154548147	Control_1_hr	Zn_1_hr	NOTEST	0.0116062	0.00425728	-1.44689	0	1	1	no
XLOC_001587	XLOC_001587	UBE2Q1-AS1	chr1:154548576-154559028	Control_1_hr	Zn_1_hr	NOTEST	0.126891	0.0703315	-0.851351	0	1	1	no
XLOC_001588	XLOC_001588	CHRNB2	chr1:154567780-154580026	Control_1_hr	Zn_1_hr	NOTEST	0.255119	0.247698	-0.0425902	0	1	1	no
XLOC_001589	XLOC_001589	RP11-307C12.13	chr1:154937369-154938059	Control_1_hr	Zn_1_hr	NOTEST	0.0501776	0.0617548	0.299508	0	1	1	no
XLOC_001590	XLOC_001590	RP11-307C12.12	chr1:154957025-154974395	Control_1_hr	Zn_1_hr	OK	0.736504	0.711966	-0.0488845	-0.0124003	0.97735	1	no
XLOC_001591	XLOC_001591	CKS1B	chr1:154974652-154979249	Control_1_hr	Zn_1_hr	OK	30.9986	34.2432	0.143614	0.82834	0.1469	1	no
XLOC_001592	XLOC_001592	MIR4258	chr1:154974652-154979249	Control_1_hr	Zn_1_hr	NOTEST	0	0	0	0	1	1	no
XLOC_001593	XLOC_001593	FLAD1	chr1:154983337-154993111	Control_1_hr	Zn_1_hr	OK	27.0254	27.8957	0.0457291	0.260706	0.6396	1	no
XLOC_001594	XLOC_001594	LENEP	chr1:154993585-154994315	Control_1_hr	Zn_1_hr	NOTEST	0.0341912	0.0811751	1.24741	0	1	1	no
XLOC_001595	XLOC_001595	ZBTB7B	chr1:155002629-155033781	Control_1_hr	Zn_1_hr	OK	16.9813	16.2701	-0.0617223	-0.177645	0.6979	1	no
XLOC_001596	XLOC_001596	ADAM15,DCST1	chr1:155033823-155062775	Control_1_hr	Zn_1_hr	OK	43.9353	41.5157	-0.0817245	-0.366895	0.50735	1	no
XLOC_001597	XLOC_001597	EFNA3,EFNA4,RP11-540D14.8	chr1:155063730-155087538	Control_1_hr	Zn_1_hr	OK	8.31392	7.59754	-0.129997	-0.736182	0.1875	1	no
XLOC_001598	XLOC_001598	Y_RNA	chr1:155120489-155120598	Control_1_hr	Zn_1_hr	NOTEST	0	0	0	0	1	1	no
XLOC_001599	XLOC_001599	EFNA1	chr1:155127459-155134857	Control_1_hr	Zn_1_hr	OK	8.58768	8.48232	-0.0178087	-0.0931877	0.8725	1	no
XLOC_001600	XLOC_001600	SLC50A1	chr1:155135343-155138857	Control_1_hr	Zn_1_hr	OK	20.8093	21.5962	0.0535458	0.305029	0.58805	1	no
XLOC_001601	XLOC_001601	HMGN2P18	chr1:155148543-155148813	Control_1_hr	Zn_1_hr	NOTEST	0.134943	0.140198	0.0551126	0	1	1	no
XLOC_001602	XLOC_001602	TRIM46	chr1:155169407-155192916	Control_1_hr	Zn_1_hr	OK	1.1413	1.07858	-0.0815536	-0.119499	0.8234	1	no
XLOC_001603	XLOC_001603	AC234582.2	chr1:155169407-155192916	Control_1_hr	Zn_1_hr	NOTEST	0	0	0	0	1	1	no
XLOC_001604	XLOC_001604	AC234582.1	chr1:155169407-155192916	Control_1_hr	Zn_1_hr	NOTEST	0	0.0684319	inf	0	1	1	no
XLOC_001605	XLOC_001605	MIR92B	chr1:155195166-155195275	Control_1_hr	Zn_1_hr	NOTEST	0	0	0	0	1	1	no
XLOC_001606	XLOC_001606	RP11-263K19.4	chr1:155195587-155227422	Control_1_hr	Zn_1_hr	OK	1.39825	1.09491	-0.352815	-0.270258	0.6408	1	no
XLOC_001607	XLOC_001607	MTX1	chr1:155195587-155227422	Control_1_hr	Zn_1_hr	OK	13.7605	14.2311	0.0485202	0.196761	0.73135	1	no
XLOC_001608	XLOC_001608	MTX1P1	chr1:155230974-155234325	Control_1_hr	Zn_1_hr	NOTEST	0	0	0	0	1	1	no
XLOC_001609	XLOC_001609	HCN3	chr1:155262867-155301434	Control_1_hr	Zn_1_hr	NOTEST	0	0	0	0	1	1	no
XLOC_001610	XLOC_001610	FDPS	chr1:155308747-155331114	Control_1_hr	Zn_1_hr	OK	185.965	195.941	0.0753931	0.407111	0.47765	1	no
XLOC_001611	XLOC_001611	RUSC1	chr1:155308747-155331114	Control_1_hr	Zn_1_hr	OK	38.2191	38.7502	0.0199093	0.0624553	0.91375	1	no
XLOC_001612	XLOC_001612	RNU6-1297P	chr1:155335267-155563944	Control_1_hr	Zn_1_hr	NOTEST	0	0	0	0	1	1	no
XLOC_001613	XLOC_001613	POU5F1P4	chr1:155335267-155563944	Control_1_hr	Zn_1_hr	NOTEST	0.0429455	0.0816266	0.926533	0	1	1	no
XLOC_001614	XLOC_001614	ASH1L-AS1	chr1:155335267-155563944	Control_1_hr	Zn_1_hr	OK	2.04973	1.96189	-0.0631945	-0.0514505	0.93425	1	no
XLOC_001615	XLOC_001615	DAP3P1	chr1:155586643-155602197	Control_1_hr	Zn_1_hr	NOTEST	0	0	0	0	1	1	no
XLOC_001616	XLOC_001616	MSTO1	chr1:155609775-155739010	Control_1_hr	Zn_1_hr	OK	6.34984	5.92859	-0.0990297	-0.13018	0.77845	1	no
XLOC_001617	XLOC_001617	DAP3	chr1:155609775-155739010	Control_1_hr	Zn_1_hr	OK	72.816	71.9859	-0.0165409	-0.0656045	0.90695	1	no
XLOC_001618	XLOC_001618	MSTO2P	chr1:155745828-155859400	Control_1_hr	Zn_1_hr	OK	0.65601	0.557925	-0.233648	-0.220534	0.70205	1	no
XLOC_001619	XLOC_001619	RP11-101O6.2	chr1:155745828-155859400	Control_1_hr	Zn_1_hr	NOTEST	0.0583106	0.0413343	-0.496417	0	1	1	no
XLOC_001620	XLOC_001620	SYT11	chr1:155859508-155885199	Control_1_hr	Zn_1_hr	OK	0.911977	0.920243	0.0130172	0.071546	0.89685	1	no
XLOC_001621	XLOC_001621	RXFP4	chr1:155941709-155942949	Control_1_hr	Zn_1_hr	NOTEST	0.0549966	0.024881	-1.1443	0	1	1	no
XLOC_001622	XLOC_001622	RP11-336K24.12	chr1:155946850-156007070	Control_1_hr	Zn_1_hr	NOTEST	0.329724	0.173998	-0.922187	0	1	1	no
XLOC_001623	XLOC_001623	RP11-336K24.5	chr1:155946850-156007070	Control_1_hr	Zn_1_hr	NOTEST	0.0581704	0	#NAME?	0	1	1	no
XLOC_001624	XLOC_001624	LAMTOR2	chr1:156054751-156058510	Control_1_hr	Zn_1_hr	OK	80.5271	81.3769	0.0151451	0.0946823	0.8672	1	no
XLOC_001625	XLOC_001625	RAB25	chr1:156061159-156070514	Control_1_hr	Zn_1_hr	NOTEST	0.0738556	0.0698292	-0.0808782	0	1	1	no
XLOC_001626	XLOC_001626	AL355388.1	chr1:156072012-156081998	Control_1_hr	Zn_1_hr	NOTEST	0	0	0	0	1	1	no
XLOC_001627	XLOC_001627	LMNA	chr1:156082572-156140089	Control_1_hr	Zn_1_hr	OK	332.628	349.462	0.0712269	0.214432	0.69975	1	no
XLOC_001628	XLOC_001628	SEMA4A	chr1:156147365-156177752	Control_1_hr	Zn_1_hr	NOTEST	0.152556	0.0969657	-0.653792	0	1	1	no
XLOC_001629	XLOC_001629	SLC25A44	chr1:156193931-156212796	Control_1_hr	Zn_1_hr	OK	17.355	18.1383	0.0636882	0.28039	0.60285	1	no
XLOC_001630	XLOC_001630	BGLAP,PMF1,PMF1-BGLAP	chr1:156212981-156248117	Control_1_hr	Zn_1_hr	OK	43.7199	45.5366	0.0587367	0.340194	0.5526	1	no
XLOC_001631	XLOC_001631	TMEM79	chr1:156282934-156295689	Control_1_hr	Zn_1_hr	OK	4.35446	4.01507	-0.117068	-0.251182	0.65565	1	no
XLOC_001632	XLOC_001632	TSACC	chr1:156308967-156367873	Control_1_hr	Zn_1_hr	OK	2.07871	2.18794	0.0738821	0.0199691	0.94275	1	no
XLOC_001633	XLOC_001633	RHBG	chr1:156369211-156385219	Control_1_hr	Zn_1_hr	NOTEST	0.0250852	0.0473014	0.91505	0	1	1	no
XLOC_001634	XLOC_001634	RP11-139I14.2	chr1:156388225-156395609	Control_1_hr	Zn_1_hr	NOTEST	0.00706167	0.00484728	-0.542833	0	1	1	no
XLOC_001635	XLOC_001635	MIR9-1	chr1:156404249-156430701	Control_1_hr	Zn_1_hr	NOTEST	0	0	0	0	1	1	no
XLOC_001636	XLOC_001636	RP11-284F21.8	chr1:156509853-156511681	Control_1_hr	Zn_1_hr	NOTEST	0.00773163	0.0221477	1.51831	0	1	1	no
XLOC_001637	XLOC_001637	TTC24	chr1:156579726-156586770	Control_1_hr	Zn_1_hr	NOTEST	0	0.0479996	inf	0	1	1	no
XLOC_001638	XLOC_001638	APOA1BP	chr1:156591761-156594299	Control_1_hr	Zn_1_hr	OK	114.431	117.141	0.0337612	0.223693	0.6911	1	no
XLOC_001639	XLOC_001639	AL365181.2	chr1:156594486-156601496	Control_1_hr	Zn_1_hr	OK	0.431212	0.291903	-0.56291	-0.2947	0.6485	1	no
XLOC_001640	XLOC_001640	HAPLN2	chr1:156619293-156625725	Control_1_hr	Zn_1_hr	NOTEST	0.0535061	0.164157	1.6173	0	1	1	no
XLOC_001641	XLOC_001641	BCAN	chr1:156641389-156661424	Control_1_hr	Zn_1_hr	NOTEST	0.120215	0.233114	0.955414	0	1	1	no
XLOC_001642	XLOC_001642	RRNAD1	chr1:156721890-156736960	Control_1_hr	Zn_1_hr	OK	16.8348	16.7581	-0.00658948	-0.0161367	0.9768	1	no
XLOC_001643	XLOC_001643	PRCC	chr1:156742106-156800817	Control_1_hr	Zn_1_hr	OK	46.3647	44.4888	-0.0595869	-0.143755	0.78225	1	no
XLOC_001644	XLOC_001644	NTRK1	chr1:156806242-156881850	Control_1_hr	Zn_1_hr	NOTEST	0.113548	0.0754498	-0.589708	0	1	1	no
XLOC_001645	XLOC_001645	PEAR1	chr1:156893697-156916434	Control_1_hr	Zn_1_hr	OK	3.73835	3.66317	-0.0293094	-0.124023	0.8185	1	no
XLOC_001646	XLOC_001646	LRRC71	chr1:156920649-156933094	Control_1_hr	Zn_1_hr	NOTEST	0.142018	0.193775	0.448306	0	1	1	no
XLOC_001647	XLOC_001647	KRT8P45	chr1:157073256-157074703	Control_1_hr	Zn_1_hr	OK	36.605	39.0946	0.0949284	0.610959	0.27575	1	no
XLOC_001648	XLOC_001648	CYCSP52	chr1:157121190-157138474	Control_1_hr	Zn_1_hr	NOTEST	0	0	0	0	1	1	no
XLOC_001649	XLOC_001649	RP11-71G12.1	chr1:157185387-157187405	Control_1_hr	Zn_1_hr	NOTEST	0	0	0	0	1	1	no
XLOC_001650	XLOC_001650	RP11-85G21.3	chr1:157280715-157283068	Control_1_hr	Zn_1_hr	NOTEST	0	0	0	0	1	1	no
XLOC_001651	XLOC_001651	RP11-367J7.3	chr1:157674320-157700857	Control_1_hr	Zn_1_hr	NOTEST	0	0	0	0	1	1	no
XLOC_001652	XLOC_001652	RP11-367J7.4	chr1:157709085-157709643	Control_1_hr	Zn_1_hr	OK	2.22622	1.85083	-0.266428	-0.593132	0.3108	1	no
XLOC_001653	XLOC_001653	MRPS21P2	chr1:157830913-157898256	Control_1_hr	Zn_1_hr	NOTEST	0.142893	0.0968937	-0.560462	0	1	1	no
XLOC_001654	XLOC_001654	RP11-451O13.1	chr1:157925064-157949071	Control_1_hr	Zn_1_hr	NOTEST	0.0216538	0.0112695	-0.942195	0	1	1	no
XLOC_001655	XLOC_001655	KIRREL	chr1:157993272-158100262	Control_1_hr	Zn_1_hr	OK	29.2783	31.795	0.11897	0.706412	0.2194	1	no
XLOC_001656	XLOC_001656	KIRREL-IT1	chr1:157993272-158100262	Control_1_hr	Zn_1_hr	OK	0.365474	0.414827	0.182743	0.0348522	0.9257	1	no
XLOC_001657	XLOC_001657	CD1D	chr1:158179946-158184896	Control_1_hr	Zn_1_hr	NOTEST	0.0310805	0.0459477	0.563983	0	1	1	no
XLOC_001658	XLOC_001658	CD1A	chr1:158254136-158258269	Control_1_hr	Zn_1_hr	NOTEST	0.00664843	0	#NAME?	0	1	1	no
XLOC_001659	XLOC_001659	CD1C	chr1:158289785-158293630	Control_1_hr	Zn_1_hr	NOTEST	0	0	0	0	1	1	no
XLOC_001660	XLOC_001660	CD1E	chr1:158353695-158357553	Control_1_hr	Zn_1_hr	NOTEST	0.0193182	0.0133774	-0.530161	0	1	1	no
XLOC_001661	XLOC_001661	EI24P2	chr1:158454197-158455273	Control_1_hr	Zn_1_hr	OK	0.941289	0.91759	-0.0367867	-0.0839952	0.89785	1	no
XLOC_001662	XLOC_001662	OR10K1	chr1:158465561-158466503	Control_1_hr	Zn_1_hr	NOTEST	0	0	0	0	1	1	no
XLOC_001663	XLOC_001663	OR10R2	chr1:158474453-158494886	Control_1_hr	Zn_1_hr	NOTEST	0	0	0	0	1	1	no
XLOC_001664	XLOC_001664	OR10R3P	chr1:158474453-158494886	Control_1_hr	Zn_1_hr	NOTEST	0	0	0	0	1	1	no
XLOC_001665	XLOC_001665	OR10R1P	chr1:158514784-158515925	Control_1_hr	Zn_1_hr	NOTEST	0	0.0166647	inf	0	1	1	no
XLOC_001666	XLOC_001666	RP11-144L1.8	chr1:158523671-158525838	Control_1_hr	Zn_1_hr	OK	3.88497	4.0356	0.0548794	0.390817	0.48815	1	no
XLOC_001667	XLOC_001667	OR10Z1	chr1:158606438-158607380	Control_1_hr	Zn_1_hr	NOTEST	0	0	0	0	1	1	no
XLOC_001668	XLOC_001668	OR6K6	chr1:158754719-158755891	Control_1_hr	Zn_1_hr	NOTEST	0	0	0	0	1	1	no
XLOC_001669	XLOC_001669	OR2AQ1P	chr1:158796013-158796213	Control_1_hr	Zn_1_hr	NOTEST	0	0	0	0	1	1	no
XLOC_001670	XLOC_001670	MNDA	chr1:158831316-158849506	Control_1_hr	Zn_1_hr	NOTEST	0	0	0	0	1	1	no
XLOC_001671	XLOC_001671	RP11-393K10.1	chr1:158878745-158883500	Control_1_hr	Zn_1_hr	NOTEST	0	0	0	0	1	1	no
XLOC_001672	XLOC_001672	PYHIN1	chr1:158930795-158977054	Control_1_hr	Zn_1_hr	NOTEST	0	0	0	0	1	1	no
XLOC_001673	XLOC_001673	IFI16	chr1:158999967-159055155	Control_1_hr	Zn_1_hr	OK	4.24106	4.2696	0.00967767	0.0336398	0.9465	1	no
XLOC_001674	XLOC_001674	AL359753.1	chr1:159059236-159059326	Control_1_hr	Zn_1_hr	NOTEST	0	0	0	0	1	1	no
XLOC_001675	XLOC_001675	ACKR1,CADM3	chr1:159171608-159207973	Control_1_hr	Zn_1_hr	NOTEST	0.0635605	0.0440102	-0.530291	0	1	1	no
XLOC_001676	XLOC_001676	RNA5SP60	chr1:159171608-159207973	Control_1_hr	Zn_1_hr	NOTEST	0	0	0	0	1	1	no
XLOC_001677	XLOC_001677	MPTX1	chr1:159276502-159277111	Control_1_hr	Zn_1_hr	NOTEST	0	0	0	0	1	1	no
XLOC_001678	XLOC_001678	FCER1A	chr1:159289713-159308224	Control_1_hr	Zn_1_hr	NOTEST	0.0150559	0.0157836	0.068098	0	1	1	no
XLOC_001679	XLOC_001679	OR10J7P	chr1:159346165-159483376	Control_1_hr	Zn_1_hr	NOTEST	0	0.0188322	inf	0	1	1	no
XLOC_001680	XLOC_001680	OR10J8P	chr1:159346165-159483376	Control_1_hr	Zn_1_hr	NOTEST	0	0.0107334	inf	0	1	1	no
XLOC_001681	XLOC_001681	OR10J4	chr1:159346165-159483376	Control_1_hr	Zn_1_hr	NOTEST	0	0	0	0	1	1	no
XLOC_001682	XLOC_001682	OR10J1	chr1:159346165-159483376	Control_1_hr	Zn_1_hr	NOTEST	0	0	0	0	1	1	no
XLOC_001683	XLOC_001683	RP11-180D21.3	chr1:159346165-159483376	Control_1_hr	Zn_1_hr	NOTEST	0	0	0	0	1	1	no
XLOC_001684	XLOC_001684	RP11-740C1.2	chr1:159557367-159558200	Control_1_hr	Zn_1_hr	NOTEST	0	0	0	0	1	1	no
XLOC_001685	XLOC_001685	APCS	chr1:159587824-159588865	Control_1_hr	Zn_1_hr	NOTEST	0	0	0	0	1	1	no
XLOC_001686	XLOC_001686	OR10J6P	chr1:159598297-159599227	Control_1_hr	Zn_1_hr	NOTEST	0.0177629	0	#NAME?	0	1	1	no
XLOC_001687	XLOC_001687	RP11-419N10.6	chr1:159649150-159649620	Control_1_hr	Zn_1_hr	NOTEST	0.0452502	0	#NAME?	0	1	1	no
XLOC_001688	XLOC_001688	RP11-419N10.5	chr1:159759169-159759589	Control_1_hr	Zn_1_hr	NOTEST	0	0	0	0	1	1	no
XLOC_001689	XLOC_001689	DUSP23	chr1:159780931-159782543	Control_1_hr	Zn_1_hr	OK	46.1841	44.529	-0.0526522	-0.320981	0.57215	1	no
XLOC_001690	XLOC_001690	FCRL6	chr1:159800510-159816251	Control_1_hr	Zn_1_hr	NOTEST	0.0107647	0	#NAME?	0	1	1	no
XLOC_001691	XLOC_001691	SLAMF8	chr1:159826749-159900163	Control_1_hr	Zn_1_hr	NOTEST	0.0787061	0.0809837	0.0411573	0	1	1	no
XLOC_001692	XLOC_001692	RP11-190A12.8	chr1:159826749-159900163	Control_1_hr	Zn_1_hr	NOTEST	0.174045	0.14547	-0.258738	0	1	1	no
XLOC_001693	XLOC_001693	LINC01133	chr1:159961217-159979061	Control_1_hr	Zn_1_hr	NOTEST	0.135318	0.0891663	-0.601779	0	1	1	no
XLOC_001694	XLOC_001694	RP11-226L15.1	chr1:160020299-160020727	Control_1_hr	Zn_1_hr	NOTEST	0	0	0	0	1	1	no
XLOC_001695	XLOC_001695	RP11-536C5.2	chr1:160037466-160079821	Control_1_hr	Zn_1_hr	NOTEST	0	0.0174814	inf	0	1	1	no
XLOC_001696	XLOC_001696	KCNJ9	chr1:160081569-160090563	Control_1_hr	Zn_1_hr	NOTEST	0	0.00198571	inf	0	1	1	no
XLOC_001697	XLOC_001697	ATP1A2	chr1:160115758-160143591	Control_1_hr	Zn_1_hr	NOTEST	0.193324	0.221337	0.195224	0	1	1	no
XLOC_001698	XLOC_001698	ATP1A4	chr1:160151569-160186977	Control_1_hr	Zn_1_hr	NOTEST	0.025628	0.0126073	-1.02347	0	1	1	no
XLOC_001699	XLOC_001699	CASQ1	chr1:160190555-160201886	Control_1_hr	Zn_1_hr	NOTEST	0.0155976	0.0902789	2.53307	0	1	1	no
XLOC_001700	XLOC_001700	AL121987.1,PEA15	chr1:160202198-160215376	Control_1_hr	Zn_1_hr	OK	85.479	90.001	0.0743715	0.0311662	0.67455	1	no
XLOC_001701	XLOC_001701	RP11-574F21.2	chr1:160215714-160286348	Control_1_hr	Zn_1_hr	OK	1.22026	0.789131	-0.628851	-0.227922	0.7899	1	no
XLOC_001702	XLOC_001702	SUMO1P3	chr1:160289272-160358952	Control_1_hr	Zn_1_hr	OK	52.5184	55.7856	0.0870689	0.0906168	0.8782	1	no
XLOC_001703	XLOC_001703	NCSTN	chr1:160289272-160358952	Control_1_hr	Zn_1_hr	OK	28.9569	29.9019	0.0463306	0.115356	0.82795	1	no
XLOC_001704	XLOC_001704	NHLH1	chr1:160367066-160372848	Control_1_hr	Zn_1_hr	NOTEST	0.0889375	0.0878911	-0.0170749	0	1	1	no
XLOC_001705	XLOC_001705	VANGL2	chr1:160400585-160428678	Control_1_hr	Zn_1_hr	OK	1.02519	1.02554	0.00048071	0.00103079	0.99635	1	no
XLOC_001706	XLOC_001706	RP11-528G1.2	chr1:160537072-160579516	Control_1_hr	Zn_1_hr	NOTEST	0	0	0	0	1	1	no
XLOC_001707	XLOC_001707	RP11-404F10.2,SETP9	chr1:160670147-160711851	Control_1_hr	Zn_1_hr	NOTEST	0.0195987	0.0264207	0.430911	0	1	1	no
XLOC_001708	XLOC_001708	SLAMF7	chr1:160739056-160754821	Control_1_hr	Zn_1_hr	OK	0.539423	0.691938	0.359227	0.507359	0.27805	1	no
XLOC_001709	XLOC_001709	LY9	chr1:160796073-160828261	Control_1_hr	Zn_1_hr	NOTEST	0.146792	0.151879	0.0491418	0	1	1	no
XLOC_001710	XLOC_001710	RP11-312J18.3	chr1:160830159-160862855	Control_1_hr	Zn_1_hr	NOTEST	0.0602834	0	#NAME?	0	1	1	no
XLOC_001711	XLOC_001711	RP11-312J18.5	chr1:160894979-160896076	Control_1_hr	Zn_1_hr	OK	40.4001	40.9813	0.0206057	0.130826	0.81905	1	no
XLOC_001712	XLOC_001712	RP11-544M22.1	chr1:160931738-160954799	Control_1_hr	Zn_1_hr	NOTEST	0.00961964	0.00406474	-1.24282	0	1	1	no
XLOC_001713	XLOC_001713	RP11-312J18.7	chr1:160931738-160954799	Control_1_hr	Zn_1_hr	OK	0.441758	0.384508	-0.200244	-0.160025	0.7671	1	no
XLOC_001714	XLOC_001714	RP11-544M22.3	chr1:160995210-161038990	Control_1_hr	Zn_1_hr	NOTEST	0	0	0	0	1	1	no
XLOC_001715	XLOC_001715	AL591806.1	chr1:161046945-161069970	Control_1_hr	Zn_1_hr	NOTEST	0	0	0	0	1	1	no
XLOC_001716	XLOC_001716	RP11-544M22.8	chr1:161070994-161089599	Control_1_hr	Zn_1_hr	NOTEST	0.0143654	0.0185226	0.366688	0	1	1	no
XLOC_001717	XLOC_001717	KLHDC9	chr1:161098360-161100346	Control_1_hr	Zn_1_hr	OK	1.42838	1.36082	-0.0699035	-0.140412	0.77245	1	no
XLOC_001718	XLOC_001718	NIT1	chr1:161100555-161132688	Control_1_hr	Zn_1_hr	OK	25.3355	25.7018	0.0207085	0.063452	0.9111	1	no
XLOC_001719	XLOC_001719	UFC1	chr1:161152775-161159349	Control_1_hr	Zn_1_hr	OK	74.0873	75.2445	0.0223591	0.134298	0.8138	1	no
XLOC_001720	XLOC_001720	USP21	chr1:161159449-161165723	Control_1_hr	Zn_1_hr	OK	15.5338	15.8889	0.0326047	0.159863	0.7752	1	no
XLOC_001721	XLOC_001721	PPOX	chr1:161166409-161178013	Control_1_hr	Zn_1_hr	OK	11.7966	10.4322	-0.177317	-0.501459	0.38225	1	no
XLOC_001722	XLOC_001722	NDUFS2	chr1:161184307-161214395	Control_1_hr	Zn_1_hr	OK	61.7852	62.7659	0.0227186	0.141018	0.8035	1	no
XLOC_001723	XLOC_001723	FCER1G	chr1:161215233-161220699	Control_1_hr	Zn_1_hr	NOTEST	0.317524	0.0825531	-1.94347	0	1	1	no
XLOC_001724	XLOC_001724	MIR5187,TOMM40L	chr1:161225938-161238302	Control_1_hr	Zn_1_hr	OK	6.43444	6.47172	0.00833475	0.0361306	0.9412	1	no
XLOC_001725	XLOC_001725	PCP4L1	chr1:161258726-161285450	Control_1_hr	Zn_1_hr	NOTEST	0.0258788	0.0188347	-0.458378	0	1	1	no
XLOC_001726	XLOC_001726	SDHC	chr1:161314256-161375340	Control_1_hr	Zn_1_hr	OK	44.3138	44.921	0.019634	0.0659948	0.91085	1	no
XLOC_001727	XLOC_001727	RNU6-481P	chr1:161401288-161401395	Control_1_hr	Zn_1_hr	NOTEST	0	7.14408	inf	0	1	1	no
XLOC_001728	XLOC_001728	RP11-122G18.7	chr1:161406067-161407082	Control_1_hr	Zn_1_hr	NOTEST	0.266327	0.21739	-0.29291	0	1	1	no
XLOC_001729	XLOC_001729	FCGR2A,FCGR2B,FCGR2C,RP11-25K21.6	chr1:161505429-161678654	Control_1_hr	Zn_1_hr	NOTEST	0.00938029	0.048517	2.37079	0	1	1	no
XLOC_001730	XLOC_001730	HSPA6	chr1:161505429-161678654	Control_1_hr	Zn_1_hr	NOTEST	0.199356	0.194322	-0.0368999	0	1	1	no
XLOC_001731	XLOC_001731	HSPA7	chr1:161505429-161678654	Control_1_hr	Zn_1_hr	NOTEST	0	0	0	0	1	1	no
XLOC_001732	XLOC_001732	Y_RNA	chr1:161699505-161699607	Control_1_hr	Zn_1_hr	NOTEST	0	0	0	0	1	1	no
XLOC_001733	XLOC_001733	FCRLA	chr1:161706971-161714352	Control_1_hr	Zn_1_hr	NOTEST	0.00984895	0.0420349	2.09355	0	1	1	no
XLOC_001734	XLOC_001734	FCRLB	chr1:161721562-161728143	Control_1_hr	Zn_1_hr	OK	0.954601	0.811205	-0.23483	-0.594969	0.22235	1	no
XLOC_001735	XLOC_001735	RN7SL466P	chr1:161735807-161736102	Control_1_hr	Zn_1_hr	NOTEST	0	0	0	0	1	1	no
XLOC_001736	XLOC_001736	DUSP12	chr1:161749757-161757238	Control_1_hr	Zn_1_hr	OK	31.8104	32.815	0.0448574	0.236603	0.68115	1	no
XLOC_001737	XLOC_001737	ATF6	chr1:161766293-161964070	Control_1_hr	Zn_1_hr	OK	6.85636	6.69656	-0.0340218	-0.2175	0.7013	1	no
XLOC_001738	XLOC_001738	RP11-456P18.2	chr1:161766293-161964070	Control_1_hr	Zn_1_hr	NOTEST	0.247269	0.225859	-0.13066	0	1	1	no
XLOC_001739	XLOC_001739	RP11-227F8.2	chr1:162039015-162039567	Control_1_hr	Zn_1_hr	NOTEST	0	0	0	0	1	1	no
XLOC_001740	XLOC_001740	C1orf226,NOS1AP,RP11-565P22.6	chr1:162069773-162386818	Control_1_hr	Zn_1_hr	OK	3.23525	2.66612	-0.279137	-1.05122	0.0513	1	no
XLOC_001741	XLOC_001741	MIR4654	chr1:162069773-162386818	Control_1_hr	Zn_1_hr	NOTEST	0	0	0	0	1	1	no
XLOC_001742	XLOC_001742	RNA5SP61	chr1:162069773-162386818	Control_1_hr	Zn_1_hr	NOTEST	0	0	0	0	1	1	no
XLOC_001743	XLOC_001743	MIR556	chr1:162069773-162386818	Control_1_hr	Zn_1_hr	NOTEST	0	0	0	0	1	1	no
XLOC_001744	XLOC_001744	SLAMF6P1	chr1:162445548-162446566	Control_1_hr	Zn_1_hr	NOTEST	0	0	0	0	1	1	no
XLOC_001745	XLOC_001745	UHMK1	chr1:162497250-162529629	Control_1_hr	Zn_1_hr	OK	17.0473	17.3056	0.0216969	0.144721	0.80215	1	no
XLOC_001746	XLOC_001746	UAP1	chr1:162561505-162599842	Control_1_hr	Zn_1_hr	OK	14.4416	17.8507	0.305756	1.62559	0.0046	0.435331	no
XLOC_001747	XLOC_001747	RP11-359K18.4	chr1:162561505-162599842	Control_1_hr	Zn_1_hr	NOTEST	0.336537	0.111288	-1.59647	0	1	1	no
XLOC_001748	XLOC_001748	DDR2	chr1:162631372-162787400	Control_1_hr	Zn_1_hr	NOTEST	0.15875	0.0956411	-0.731052	0	1	1	no
XLOC_001749	XLOC_001749	RN7SL861P	chr1:162631372-162787400	Control_1_hr	Zn_1_hr	NOTEST	0	0	0	0	1	1	no
XLOC_001750	XLOC_001750	HSD17B7	chr1:162790701-162812817	Control_1_hr	Zn_1_hr	OK	10.1675	10.9691	0.109482	0.656334	0.2345	1	no
XLOC_001751	XLOC_001751	RP11-331H2.4	chr1:162824457-162868815	Control_1_hr	Zn_1_hr	NOTEST	0	0	0	0	1	1	no
XLOC_001752	XLOC_001752	RGS4	chr1:163068774-163076802	Control_1_hr	Zn_1_hr	NOTEST	0.0114882	0.00327272	-1.81159	0	1	1	no
XLOC_001753	XLOC_001753	RP11-267N12.1	chr1:163111120-163355764	Control_1_hr	Zn_1_hr	NOTEST	0	0.00746859	inf	0	1	1	no
XLOC_001754	XLOC_001754	RP11-267N12.2	chr1:163111120-163355764	Control_1_hr	Zn_1_hr	NOTEST	0.0140062	0	#NAME?	0	1	1	no
XLOC_001755	XLOC_001755	RP11-77M5.1	chr1:163111120-163355764	Control_1_hr	Zn_1_hr	NOTEST	0	0	0	0	1	1	no
XLOC_001756	XLOC_001756	NUF2	chr1:163111120-163355764	Control_1_hr	Zn_1_hr	OK	22.7682	22.5907	-0.0112885	-0.0595833	0.9133	1	no
XLOC_001757	XLOC_001757	RNA5SP63	chr1:163509483-163509595	Control_1_hr	Zn_1_hr	NOTEST	0	0	0	0	1	1	no
XLOC_001758	XLOC_001758	U3	chr1:163923669-163923873	Control_1_hr	Zn_1_hr	NOTEST	0	0	0	0	1	1	no
XLOC_001759	XLOC_001759	NMNAT1P2	chr1:164343004-164343864	Control_1_hr	Zn_1_hr	NOTEST	0.018788	0	#NAME?	0	1	1	no
XLOC_001760	XLOC_001760	RNU5F-6P	chr1:164351272-164351388	Control_1_hr	Zn_1_hr	NOTEST	0	0	0	0	1	1	no
XLOC_001761	XLOC_001761	HMGB3P6	chr1:164356766-164357364	Control_1_hr	Zn_1_hr	OK	6.94218	7.38893	0.0899761	0.393275	0.49545	1	no
XLOC_001762	XLOC_001762	PBX1	chr1:164555583-164899296	Control_1_hr	Zn_1_hr	OK	25.917	27.5603	0.0886906	0.412157	0.4493	1	no
XLOC_001763	XLOC_001763	AL391001.1	chr1:164555583-164899296	Control_1_hr	Zn_1_hr	NOTEST	0	0	0	0	1	1	no
XLOC_001764	XLOC_001764	RNU6-171P	chr1:164555583-164899296	Control_1_hr	Zn_1_hr	NOTEST	0	0	0	0	1	1	no
XLOC_001765	XLOC_001765	PBX1	chr1:164555583-164899296	Control_1_hr	Zn_1_hr	NOTEST	0	0	0	0	1	1	no
XLOC_001766	XLOC_001766	AL391001.2	chr1:164555583-164899296	Control_1_hr	Zn_1_hr	NOTEST	0	0	0	0	1	1	no
XLOC_001767	XLOC_001767	RP11-477H21.2	chr1:164555583-164899296	Control_1_hr	Zn_1_hr	OK	0.689073	1.01359	0.556751	0.220733	0.6933	1	no
XLOC_001768	XLOC_001768	RP11-506O24.2	chr1:164555583-164899296	Control_1_hr	Zn_1_hr	NOTEST	0	0	0	0	1	1	no
XLOC_001769	XLOC_001769	Y_RNA	chr1:164555583-164899296	Control_1_hr	Zn_1_hr	NOTEST	0	0	0	0	1	1	no
XLOC_001770	XLOC_001770	RP11-38C18.2	chr1:165201866-165356715	Control_1_hr	Zn_1_hr	NOTEST	0	0	0	0	1	1	no
XLOC_001771	XLOC_001771	RP11-38C18.3	chr1:165201866-165356715	Control_1_hr	Zn_1_hr	NOTEST	0	0	0	0	1	1	no
XLOC_001772	XLOC_001772	RP11-541H12.1	chr1:165476840-165582476	Control_1_hr	Zn_1_hr	NOTEST	0	0	0	0	1	1	no
XLOC_001773	XLOC_001773	LRRC52	chr1:165476840-165582476	Control_1_hr	Zn_1_hr	NOTEST	0	0	0	0	1	1	no
XLOC_001774	XLOC_001774	RP11-306I1.1	chr1:165476840-165582476	Control_1_hr	Zn_1_hr	NOTEST	0.018677	0.0235462	0.33423	0	1	1	no
XLOC_001775	XLOC_001775	RP11-306I1.2	chr1:165598462-165623331	Control_1_hr	Zn_1_hr	NOTEST	0	0.0298629	inf	0	1	1	no
XLOC_001776	XLOC_001776	MGST3	chr1:165630860-165661796	Control_1_hr	Zn_1_hr	OK	132.1	131.273	-0.00905546	-0.0576764	0.92165	1	no
XLOC_001777	XLOC_001777	MGST3	chr1:165630860-165661796	Control_1_hr	Zn_1_hr	NOTEST	0.0880835	0.0976049	0.148083	0	1	1	no
XLOC_001778	XLOC_001778	RP11-466F5.3	chr1:165662215-165709968	Control_1_hr	Zn_1_hr	NOTEST	0	0	0	0	1	1	no
XLOC_001779	XLOC_001779	RP11-466F5.4	chr1:165662215-165709968	Control_1_hr	Zn_1_hr	NOTEST	0	0	0	0	1	1	no
XLOC_001780	XLOC_001780	RP11-466F5.6	chr1:165662215-165709968	Control_1_hr	Zn_1_hr	NOTEST	0.0123126	0.0154431	0.326822	0	1	1	no
XLOC_001781	XLOC_001781	RP11-466F5.8	chr1:165724292-165911618	Control_1_hr	Zn_1_hr	NOTEST	0.0608045	0.109785	0.852436	0	1	1	no
XLOC_001782	XLOC_001782	RP11-466F5.9	chr1:165724292-165911618	Control_1_hr	Zn_1_hr	NOTEST	0.125408	0.0546801	-1.19754	0	1	1	no
XLOC_001783	XLOC_001783	UCK2	chr1:165724292-165911618	Control_1_hr	Zn_1_hr	OK	66.4996	67.1919	0.014943	0.0621087	0.9123	1	no
XLOC_001784	XLOC_001784	RP11-7G12.1	chr1:166022214-166023027	Control_1_hr	Zn_1_hr	NOTEST	0	0	0	0	1	1	no
XLOC_001785	XLOC_001785	RNA5SP64	chr1:166042243-166042350	Control_1_hr	Zn_1_hr	NOTEST	0	0	0	0	1	1	no
XLOC_001786	XLOC_001786	RP11-375H19.2	chr1:166057425-166166969	Control_1_hr	Zn_1_hr	NOTEST	0.0765044	0	#NAME?	0	1	1	no
XLOC_001787	XLOC_001787	RP11-479J7.2	chr1:166334883-166335762	Control_1_hr	Zn_1_hr	NOTEST	0	0	0	0	1	1	no
XLOC_001788	XLOC_001788	FMO7P	chr1:166474744-166490039	Control_1_hr	Zn_1_hr	NOTEST	0	0	0	0	1	1	no
XLOC_001789	XLOC_001789	FMO8P	chr1:166566177-166580705	Control_1_hr	Zn_1_hr	NOTEST	0	0	0	0	1	1	no
XLOC_001790	XLOC_001790	FMO9P	chr1:166603674-166631400	Control_1_hr	Zn_1_hr	NOTEST	0	0.0038446	inf	0	1	1	no
XLOC_001791	XLOC_001791	FMO10P	chr1:166665884-166682196	Control_1_hr	Zn_1_hr	NOTEST	0	0.00607568	inf	0	1	1	no
XLOC_001792	XLOC_001792	RPL4P2	chr1:166747378-166748660	Control_1_hr	Zn_1_hr	NOTEST	0.128955	0.167317	0.375718	0	1	1	no
XLOC_001793	XLOC_001793	FMO11P	chr1:166763333-166792767	Control_1_hr	Zn_1_hr	NOTEST	0	0	0	0	1	1	no
XLOC_001794	XLOC_001794	CNN2P10	chr1:166796265-166797183	Control_1_hr	Zn_1_hr	NOTEST	0	0	0	0	1	1	no
XLOC_001795	XLOC_001795	POGK	chr1:166839446-166856344	Control_1_hr	Zn_1_hr	OK	18.3246	17.9695	-0.0282321	-0.151156	0.7876	1	no
XLOC_001796	XLOC_001796	DUTP6	chr1:166856509-166876327	Control_1_hr	Zn_1_hr	NOTEST	0.206397	0.0826771	-1.31987	0	1	1	no
XLOC_001797	XLOC_001797	MAEL	chr1:166975581-167022214	Control_1_hr	Zn_1_hr	NOTEST	0.0247615	0	#NAME?	0	1	1	no
XLOC_001798	XLOC_001798	RNA5SP65	chr1:166975581-167022214	Control_1_hr	Zn_1_hr	NOTEST	0	0	0	0	1	1	no
XLOC_001799	XLOC_001799	RP11-102C16.3	chr1:167052550-167090631	Control_1_hr	Zn_1_hr	NOTEST	0	0	0	0	1	1	no
XLOC_001800	XLOC_001800	DUSP27	chr1:167094044-167129165	Control_1_hr	Zn_1_hr	NOTEST	0.00392631	0.0101149	1.36524	0	1	1	no
XLOC_001801	XLOC_001801	POU2F1	chr1:167220828-167427345	Control_1_hr	Zn_1_hr	OK	1.93501	1.67048	-0.212076	-0.539535	0.1999	1	no
XLOC_001802	XLOC_001802	RP11-52A20.2	chr1:167220828-167427345	Control_1_hr	Zn_1_hr	NOTEST	0.0152548	0.020009	0.391385	0	1	1	no
XLOC_001803	XLOC_001803	AKR1D1P1	chr1:167519535-167520586	Control_1_hr	Zn_1_hr	NOTEST	0	0	0	0	1	1	no
XLOC_001804	XLOC_001804	RP3-455J7.3	chr1:167591391-167591846	Control_1_hr	Zn_1_hr	NOTEST	0	0	0	0	1	1	no
XLOC_001805	XLOC_001805	RCSD1	chr1:167627384-167706249	Control_1_hr	Zn_1_hr	NOTEST	0.0224938	0.0113688	-0.984442	0	1	1	no
XLOC_001806	XLOC_001806	MPZL1	chr1:167721191-167791919	Control_1_hr	Zn_1_hr	OK	102.352	101.176	-0.0166652	-0.0800069	0.8897	1	no
XLOC_001807	XLOC_001807	RP1-313L4.3	chr1:167809387-167914215	Control_1_hr	Zn_1_hr	NOTEST	0.140133	0.142294	0.0220719	0	1	1	no
XLOC_001808	XLOC_001808	DCAF6	chr1:167916728-168075843	Control_1_hr	Zn_1_hr	OK	25.6897	26.09	0.0223046	0.0573777	0.92355	1	no
XLOC_001809	XLOC_001809	MIR1255B2	chr1:167916728-168075843	Control_1_hr	Zn_1_hr	NOTEST	0	0	0	0	1	1	no
XLOC_001810	XLOC_001810	TIPRL	chr1:168178932-168202114	Control_1_hr	Zn_1_hr	OK	21.1499	22.7718	0.106597	0.494239	0.37835	1	no
XLOC_001811	XLOC_001811	RPL34P1	chr1:168210615-168210969	Control_1_hr	Zn_1_hr	NOTEST	0.0737276	0.0538838	-0.452354	0	1	1	no
XLOC_001812	XLOC_001812	RP1-69E11.3	chr1:168215404-168215652	Control_1_hr	Zn_1_hr	NOTEST	0	0	0	0	1	1	no
XLOC_001813	XLOC_001813	SFT2D2	chr1:168225937-168253025	Control_1_hr	Zn_1_hr	OK	5.71224	6.34398	0.151332	0.316308	0.56015	1	no
XLOC_001814	XLOC_001814	TBX19	chr1:168281039-168314426	Control_1_hr	Zn_1_hr	OK	0.44722	0.408228	-0.131608	-0.284491	0.60005	1	no
XLOC_001815	XLOC_001815	RP5-1059H15.1	chr1:168369053-168369601	Control_1_hr	Zn_1_hr	NOTEST	0.157826	0.24122	0.612014	0	1	1	no
XLOC_001816	XLOC_001816	MIR557	chr1:168375523-168375621	Control_1_hr	Zn_1_hr	NOTEST	0	0	0	0	1	1	no
XLOC_001817	XLOC_001817	RP4-738P11.3	chr1:168540764-168543997	Control_1_hr	Zn_1_hr	NOTEST	0	0	0	0	1	1	no
XLOC_001818	XLOC_001818	XCL1	chr1:168576472-168582077	Control_1_hr	Zn_1_hr	NOTEST	0	0	0	0	1	1	no
XLOC_001819	XLOC_001819	LINC00626	chr1:168786938-168792886	Control_1_hr	Zn_1_hr	NOTEST	0	0	0	0	1	1	no
XLOC_001820	XLOC_001820	SUMO1P2	chr1:168898135-168898439	Control_1_hr	Zn_1_hr	NOTEST	0	0	0	0	1	1	no
XLOC_001821	XLOC_001821	RPL29P7	chr1:168903904-169087005	Control_1_hr	Zn_1_hr	NOTEST	0	0.130799	inf	0	1	1	no
XLOC_001822	XLOC_001822	RNA5SP66	chr1:168903904-169087005	Control_1_hr	Zn_1_hr	NOTEST	0	0	0	0	1	1	no
XLOC_001823	XLOC_001823	RP5-1018K9.1	chr1:169104123-169104907	Control_1_hr	Zn_1_hr	NOTEST	0	0	0	0	1	1	no
XLOC_001824	XLOC_001824	ATP1B1	chr1:169105696-169367967	Control_1_hr	Zn_1_hr	OK	165.462	163.485	-0.0173369	-0.11149	0.84545	1	no
XLOC_001825	XLOC_001825	RP4-800F24.1	chr1:169105696-169367967	Control_1_hr	Zn_1_hr	NOTEST	0	0	0	0	1	1	no
XLOC_001826	XLOC_001826	BLZF1	chr1:169367969-169460669	Control_1_hr	Zn_1_hr	OK	9.93936	9.70831	-0.033932	-0.165885	0.76645	1	no
XLOC_001827	XLOC_001827	RP1-206D15.6	chr1:169486075-169486986	Control_1_hr	Zn_1_hr	NOTEST	0.238292	0.30434	0.352955	0	1	1	no
XLOC_001828	XLOC_001828	C1orf112	chr1:169662006-169894267	Control_1_hr	Zn_1_hr	OK	13.952	13.8398	-0.0116497	-0.0387917	0.94695	1	no
XLOC_001829	XLOC_001829	RN7SL333P	chr1:169662006-169894267	Control_1_hr	Zn_1_hr	OK	0.368312	0.406952	0.143932	0.0297516	0.86055	1	no
XLOC_001830	XLOC_001830	MRPS10P1	chr1:169921325-170085208	Control_1_hr	Zn_1_hr	NOTEST	0	0	0	0	1	1	no
XLOC_001831	XLOC_001831	RP11-332H17.1	chr1:169921325-170085208	Control_1_hr	Zn_1_hr	NOTEST	0	0	0	0	1	1	no
XLOC_001832	XLOC_001832	SIGLEC30P	chr1:170115635-170116576	Control_1_hr	Zn_1_hr	NOTEST	0	0	0	0	1	1	no
XLOC_001833	XLOC_001833	METTL11B	chr1:170146000-170167790	Control_1_hr	Zn_1_hr	NOTEST	0	0	0	0	1	1	no
XLOC_001834	XLOC_001834	MIR3119-2	chr1:170146000-170167790	Control_1_hr	Zn_1_hr	NOTEST	0	0	0	0	1	1	no
XLOC_001835	XLOC_001835	RP11-297H3.3	chr1:170174402-170241287	Control_1_hr	Zn_1_hr	NOTEST	0	0	0	0	1	1	no
XLOC_001836	XLOC_001836	GORAB	chr1:170460452-170553446	Control_1_hr	Zn_1_hr	OK	4.08805	4.6134	0.174419	0.759974	0.1645	1	no
XLOC_001837	XLOC_001837	RP1-79C4.1	chr1:170598853-170647339	Control_1_hr	Zn_1_hr	NOTEST	0.0076829	0.0105184	0.453199	0	1	1	no
XLOC_001838	XLOC_001838	PRRX1	chr1:170662727-170739419	Control_1_hr	Zn_1_hr	NOTEST	0.187221	0.0903033	-1.0519	0	1	1	no
XLOC_001839	XLOC_001839	RP1-79C4.4	chr1:170662727-170739419	Control_1_hr	Zn_1_hr	NOTEST	0	0	0	0	1	1	no
XLOC_001840	XLOC_001840	MROH9	chr1:170935470-171064765	Control_1_hr	Zn_1_hr	NOTEST	0	0.00265726	inf	0	1	1	no
XLOC_001841	XLOC_001841	RP5-1092L12.2	chr1:171083564-171085205	Control_1_hr	Zn_1_hr	NOTEST	0	0.00545456	inf	0	1	1	no
XLOC_001842	XLOC_001842	FMO3	chr1:171090876-171117819	Control_1_hr	Zn_1_hr	NOTEST	0	0	0	0	1	1	no
XLOC_001843	XLOC_001843	FMO6P	chr1:171137739-171161568	Control_1_hr	Zn_1_hr	NOTEST	0	0	0	0	1	1	no
XLOC_001844	XLOC_001844	FMO2	chr1:171185207-171227788	Control_1_hr	Zn_1_hr	NOTEST	0	0.00215882	inf	0	1	1	no
XLOC_001845	XLOC_001845	FMO1	chr1:171247579-171285978	Control_1_hr	Zn_1_hr	NOTEST	0.0964873	0.0346619	-1.47699	0	1	1	no
XLOC_001846	XLOC_001846	FMO4	chr1:171314207-171342084	Control_1_hr	Zn_1_hr	OK	0.722192	0.71765	-0.00910052	-0.0103865	0.9814	1	no
XLOC_001847	XLOC_001847	RP4-798A17.5	chr1:171345088-171345320	Control_1_hr	Zn_1_hr	NOTEST	0	0	0	0	1	1	no
XLOC_001848	XLOC_001848	GM2AP2	chr1:171392228-171392790	Control_1_hr	Zn_1_hr	NOTEST	0	0	0	0	1	1	no
XLOC_001849	XLOC_001849	PRRC2C	chr1:171485550-171593511	Control_1_hr	Zn_1_hr	OK	36.3914	35.9525	-0.0175035	-0.0540372	0.90315	1	no
XLOC_001850	XLOC_001850	RN7SL425P	chr1:171485550-171593511	Control_1_hr	Zn_1_hr	NOTEST	0	0.0735459	inf	0	1	1	no
XLOC_001851	XLOC_001851	Z98750.1	chr1:171485550-171593511	Control_1_hr	Zn_1_hr	NOTEST	0	0	0	0	1	1	no
XLOC_001852	XLOC_001852	RP4-560B9.4	chr1:171762073-171762524	Control_1_hr	Zn_1_hr	NOTEST	0.307597	0.34587	0.169187	0	1	1	no
XLOC_001853	XLOC_001853	SCARNA20	chr1:171768069-171768175	Control_1_hr	Zn_1_hr	NOTEST	0	0	0	0	1	1	no
XLOC_001854	XLOC_001854	METTL13	chr1:171781663-171814023	Control_1_hr	Zn_1_hr	OK	44.1389	42.1723	-0.0657558	-0.274737	0.62375	1	no
XLOC_001855	XLOC_001855	RP4-612B18.3	chr1:171781663-171814023	Control_1_hr	Zn_1_hr	NOTEST	0.0529086	0	#NAME?	0	1	1	no
XLOC_001856	XLOC_001856	DNM3	chr1:171841497-172468831	Control_1_hr	Zn_1_hr	OK	0.941956	0.9008	-0.0644522	-0.0859968	0.87755	1	no
XLOC_001857	XLOC_001857	DNM3-IT1	chr1:171841497-172468831	Control_1_hr	Zn_1_hr	NOTEST	0.179145	0.0821296	-1.12515	0	1	1	no
XLOC_001858	XLOC_001858	RNU6-157P	chr1:171841497-172468831	Control_1_hr	Zn_1_hr	NOTEST	0	0	0	0	1	1	no
XLOC_001859	XLOC_001859	C1orf105	chr1:171841497-172468831	Control_1_hr	Zn_1_hr	NOTEST	0.223242	0.0943269	-1.24287	0	1	1	no
XLOC_001860	XLOC_001860	SUCO	chr1:172532348-172611833	Control_1_hr	Zn_1_hr	OK	9.63579	9.82508	0.0280654	0.134937	0.80225	1	no
XLOC_001861	XLOC_001861	FASLG	chr1:172659017-172666874	Control_1_hr	Zn_1_hr	NOTEST	0.00766358	0.0109113	0.509738	0	1	1	no
XLOC_001862	XLOC_001862	SLC25A38P1	chr1:172748559-172749502	Control_1_hr	Zn_1_hr	OK	2.3491	2.04729	-0.198393	-0.651097	0.26755	1	no
XLOC_001863	XLOC_001863	RP3-332O11.2	chr1:172752585-172752924	Control_1_hr	Zn_1_hr	NOTEST	0	0	0	0	1	1	no
XLOC_001864	XLOC_001864	RP1-15D23.2	chr1:172775904-173064015	Control_1_hr	Zn_1_hr	NOTEST	0	0	0	0	1	1	no
XLOC_001865	XLOC_001865	RP3-471M13.2	chr1:172775904-173064015	Control_1_hr	Zn_1_hr	NOTEST	0	0	0	0	1	1	no
XLOC_001866	XLOC_001866	RP11-296O14.1	chr1:173351688-173352004	Control_1_hr	Zn_1_hr	NOTEST	0	0.068479	inf	0	1	1	no
XLOC_001867	XLOC_001867	PRDX6	chr1:173477265-173488807	Control_1_hr	Zn_1_hr	OK	115.53	116.693	0.0144514	0.0902284	0.8753	1	no
XLOC_001868	XLOC_001868	RP3-436N22.3	chr1:173500463-173669862	Control_1_hr	Zn_1_hr	NOTEST	0	0	0	0	1	1	no
XLOC_001869	XLOC_001869	RP11-360D2.1	chr1:173500463-173669862	Control_1_hr	Zn_1_hr	NOTEST	0	0	0	0	1	1	no
XLOC_001870	XLOC_001870	KLHL20	chr1:173714940-173786702	Control_1_hr	Zn_1_hr	OK	6.73608	7.18981	0.0940444	0.371262	0.50465	1	no
XLOC_001871	XLOC_001871	RP11-360D2.2	chr1:173714940-173786702	Control_1_hr	Zn_1_hr	NOTEST	0	0.453287	inf	0	1	1	no
XLOC_001872	XLOC_001872	RN7SKP160	chr1:173791547-173791887	Control_1_hr	Zn_1_hr	NOTEST	0	0.0585322	inf	0	1	1	no
XLOC_001873	XLOC_001873	Y_RNA	chr1:173799549-173858546	Control_1_hr	Zn_1_hr	NOTEST	0	0	0	0	1	1	no
XLOC_001874	XLOC_001874	DARS2	chr1:173799549-173858546	Control_1_hr	Zn_1_hr	OK	34.0858	34.1358	0.00211403	0.0131742	0.98175	1	no
XLOC_001875	XLOC_001875	GAS5-AS1	chr1:173863247-173903549	Control_1_hr	Zn_1_hr	OK	0.687242	0.799527	0.218329	0.12307	0.82595	1	no
XLOC_001876	XLOC_001876	ZBTB37	chr1:173863247-173903549	Control_1_hr	Zn_1_hr	OK	1.01506	0.870095	-0.22232	-0.279508	0.63085	1	no
XLOC_001877	XLOC_001877	RNA5SP67	chr1:173921069-173921200	Control_1_hr	Zn_1_hr	NOTEST	0	0	0	0	1	1	no
XLOC_001878	XLOC_001878	RP11-160H22.3	chr1:174022508-174022985	Control_1_hr	Zn_1_hr	NOTEST	0.0819624	0	#NAME?	0	1	1	no
XLOC_001879	XLOC_001879	RABGAP1L	chr1:174115299-174995308	Control_1_hr	Zn_1_hr	OK	7.94386	7.59269	-0.0652297	-0.108553	0.8374	1	no
XLOC_001880	XLOC_001880	AL022400.1	chr1:174115299-174995308	Control_1_hr	Zn_1_hr	NOTEST	0	0	0	0	1	1	no
XLOC_001881	XLOC_001881	GPR52	chr1:174115299-174995308	Control_1_hr	Zn_1_hr	NOTEST	0.0146956	0.036608	1.31678	0	1	1	no
XLOC_001882	XLOC_001882	RP1-102G20.2	chr1:174115299-174995308	Control_1_hr	Zn_1_hr	OK	6.28356	7.37742	0.231534	0.358117	0.5378	1	no
XLOC_001883	XLOC_001883	RABGAP1L-IT1	chr1:174115299-174995308	Control_1_hr	Zn_1_hr	NOTEST	0	0	0	0	1	1	no
XLOC_001884	XLOC_001884	RNU6-307P	chr1:174996523-174996629	Control_1_hr	Zn_1_hr	NOTEST	0	0	0	0	1	1	no
XLOC_001885	XLOC_001885	CACYBP	chr1:174999162-175023425	Control_1_hr	Zn_1_hr	OK	116.076	118.206	0.0262347	0.0599274	0.918	1	no
XLOC_001886	XLOC_001886	TNN	chr1:175067857-175148066	Control_1_hr	Zn_1_hr	NOTEST	0	0	0	0	1	1	no
XLOC_001887	XLOC_001887	RP5-1114G22.1	chr1:175297079-175297240	Control_1_hr	Zn_1_hr	NOTEST	0	0	0	0	1	1	no
XLOC_001888	XLOC_001888	RP3-518E13.2	chr1:175307217-175743770	Control_1_hr	Zn_1_hr	NOTEST	0	0.0276498	inf	0	1	1	no
XLOC_001889	XLOC_001889	RP11-222A5.1	chr1:175877342-175880468	Control_1_hr	Zn_1_hr	NOTEST	0	0	0	0	1	1	no
XLOC_001890	XLOC_001890	RP11-318C24.1	chr1:175921974-175922145	Control_1_hr	Zn_1_hr	OK	8.9615	11.7926	0.396073	0.420449	0.49295	1	no
XLOC_001891	XLOC_001891	RP11-492I21.1	chr1:175944830-176207493	Control_1_hr	Zn_1_hr	NOTEST	0.21353	0.0858058	-1.31529	0	1	1	no
XLOC_001892	XLOC_001892	RP11-195C7.1	chr1:176207647-176229330	Control_1_hr	Zn_1_hr	NOTEST	0.0803944	0.0353037	-1.18728	0	1	1	no
XLOC_001893	XLOC_001893	U7	chr1:176207647-176229330	Control_1_hr	Zn_1_hr	NOTEST	0	0	0	0	1	1	no
XLOC_001894	XLOC_001894	RP11-195C7.3	chr1:176272482-176273402	Control_1_hr	Zn_1_hr	NOTEST	0.0432382	0.015006	-1.52677	0	1	1	no
XLOC_001895	XLOC_001895	PAPPA2	chr1:176463170-176845605	Control_1_hr	Zn_1_hr	NOTEST	0.00303818	0.0034149	0.168635	0	1	1	no
XLOC_001896	XLOC_001896	AL021398.2	chr1:176857301-177164973	Control_1_hr	Zn_1_hr	NOTEST	0	0	0	0	1	1	no
XLOC_001897	XLOC_001897	BRINP2	chr1:177171496-177282422	Control_1_hr	Zn_1_hr	NOTEST	0.0639436	0.0580699	-0.13901	0	1	1	no
XLOC_001898	XLOC_001898	RP1-35C21.1	chr1:177351585-177366272	Control_1_hr	Zn_1_hr	NOTEST	0	0	0	0	1	1	no
XLOC_001899	XLOC_001899	AL122019.1	chr1:177393286-177597709	Control_1_hr	Zn_1_hr	NOTEST	0	0	0	0	1	1	no
XLOC_001900	XLOC_001900	RP11-63B19.1	chr1:177700523-177710330	Control_1_hr	Zn_1_hr	NOTEST	0	0	0	0	1	1	no
XLOC_001901	XLOC_001901	RP11-568K15.2	chr1:177923955-178038007	Control_1_hr	Zn_1_hr	NOTEST	0	0	0	0	1	1	no
XLOC_001902	XLOC_001902	RASAL2	chr1:178094140-178484147	Control_1_hr	Zn_1_hr	OK	6.10706	6.36837	0.0604474	0.177698	0.74435	1	no
XLOC_001903	XLOC_001903	RP4-765C7.2	chr1:178094140-178484147	Control_1_hr	Zn_1_hr	OK	156.107	166.434	0.0924159	0.36779	0.5263	1	no
XLOC_001904	XLOC_001904	Metazoa_SRP	chr1:178484407-178484682	Control_1_hr	Zn_1_hr	NOTEST	0.124478	0	#NAME?	0	1	1	no
XLOC_001905	XLOC_001905	C1orf220,TEX35	chr1:178513076-178548889	Control_1_hr	Zn_1_hr	OK	0.498248	0.393432	-0.340752	-0.367762	0.31745	1	no
XLOC_001906	XLOC_001906	RNA5SP69	chr1:178560912-178561029	Control_1_hr	Zn_1_hr	NOTEST	0	0	0	0	1	1	no
XLOC_001907	XLOC_001907	RP5-1098D14.1	chr1:178651705-178652282	Control_1_hr	Zn_1_hr	NOTEST	0.130136	0.155242	0.254501	0	1	1	no
XLOC_001908	XLOC_001908	MIR4424	chr1:178677748-178677834	Control_1_hr	Zn_1_hr	NOTEST	0	0	0	0	1	1	no
XLOC_001909	XLOC_001909	RALGPS2	chr1:178724305-178921841	Control_1_hr	Zn_1_hr	OK	8.40639	8.29314	-0.0195681	-0.039009	0.94475	1	no
XLOC_001910	XLOC_001910	FAM20B	chr1:179025803-179076562	Control_1_hr	Zn_1_hr	OK	13.2642	13.7919	0.056292	0.368746	0.5188	1	no
XLOC_001911	XLOC_001911	TOR3A	chr1:179081376-179098023	Control_1_hr	Zn_1_hr	OK	70.8625	67.9629	-0.0602748	-0.322683	0.57585	1	no
XLOC_001912	XLOC_001912	RP11-345I18.1	chr1:179099326-179229684	Control_1_hr	Zn_1_hr	NOTEST	0	0	0	0	1	1	no
XLOC_001913	XLOC_001913	SETP10	chr1:179099326-179229684	Control_1_hr	Zn_1_hr	NOTEST	0	0.0145572	inf	0	1	1	no
XLOC_001914	XLOC_001914	SNORA67	chr1:179099326-179229684	Control_1_hr	Zn_1_hr	NOTEST	0	0	0	0	1	1	no
XLOC_001915	XLOC_001915	SNORA67	chr1:179099326-179229684	Control_1_hr	Zn_1_hr	NOTEST	0	0	0	0	1	1	no
XLOC_001916	XLOC_001916	EIF4A1P11	chr1:179099326-179229684	Control_1_hr	Zn_1_hr	NOTEST	0.214474	0.161812	-0.406481	0	1	1	no
XLOC_001917	XLOC_001917	RP11-345I18.4	chr1:179099326-179229684	Control_1_hr	Zn_1_hr	NOTEST	0.059423	0	#NAME?	0	1	1	no
XLOC_001918	XLOC_001918	COX5BP8	chr1:179255732-179256081	Control_1_hr	Zn_1_hr	NOTEST	0	0	0	0	1	1	no
XLOC_001919	XLOC_001919	SOAT1	chr1:179293713-179358680	Control_1_hr	Zn_1_hr	OK	21.3938	22.5114	0.0734648	0.241764	0.6698	1	no
XLOC_001920	XLOC_001920	AXDND1	chr1:179365719-179575952	Control_1_hr	Zn_1_hr	NOTEST	0.111398	0.257033	1.20623	0	1	1	no
XLOC_001921	XLOC_001921	RNU5F-2P	chr1:179576267-179576349	Control_1_hr	Zn_1_hr	NOTEST	0	0	0	0	1	1	no
XLOC_001922	XLOC_001922	RP11-545A16.3	chr1:179586704-179589175	Control_1_hr	Zn_1_hr	NOTEST	0.0650074	0.048929	-0.409914	0	1	1	no
XLOC_001923	XLOC_001923	RP11-545A16.4	chr1:179590371-179591305	Control_1_hr	Zn_1_hr	NOTEST	0.0353391	0.0122162	-1.53247	0	1	1	no
XLOC_001924	XLOC_001924	TDRD5	chr1:179591612-179691272	Control_1_hr	Zn_1_hr	NOTEST	0.129475	0.0747761	-0.792024	0	1	1	no
XLOC_001925	XLOC_001925	RP11-12M5.1	chr1:179730216-179742697	Control_1_hr	Zn_1_hr	NOTEST	0	0	0	0	1	1	no
XLOC_001926	XLOC_001926	FAM163A	chr1:179743162-179818191	Control_1_hr	Zn_1_hr	NOTEST	0.0184527	0.0110529	-0.739414	0	1	1	no
XLOC_001927	XLOC_001927	TOR1AIP1	chr1:179881606-179925000	Control_1_hr	Zn_1_hr	OK	24.3447	25.5591	0.0702294	0.285891	0.58745	1	no
XLOC_001928	XLOC_001928	RN7SL230P	chr1:179881606-179925000	Control_1_hr	Zn_1_hr	NOTEST	0	0	0	0	1	1	no
XLOC_001929	XLOC_001929	CEP350	chr1:179954737-180114880	Control_1_hr	Zn_1_hr	OK	7.19189	6.71257	-0.0995054	-0.269001	0.56975	1	no
XLOC_001930	XLOC_001930	RP11-533E19.3	chr1:179954737-180114880	Control_1_hr	Zn_1_hr	NOTEST	0	0.0269943	inf	0	1	1	no
XLOC_001931	XLOC_001931	AL390718.1	chr1:180139520-180139633	Control_1_hr	Zn_1_hr	NOTEST	0	0	0	0	1	1	no
XLOC_001932	XLOC_001932	QSOX1	chr1:180154833-180204030	Control_1_hr	Zn_1_hr	OK	47.4071	48.2663	0.0259152	0.142676	0.79985	1	no
XLOC_001933	XLOC_001933	LHX4	chr1:180230285-180502954	Control_1_hr	Zn_1_hr	OK	1.51947	1.52832	0.00837809	0.0168216	0.9744	1	no
XLOC_001934	XLOC_001934	VDAC1P4	chr1:180230285-180502954	Control_1_hr	Zn_1_hr	NOTEST	0.0203125	0.063329	1.6405	0	1	1	no
XLOC_001935	XLOC_001935	AL358354.1	chr1:180545831-180545931	Control_1_hr	Zn_1_hr	NOTEST	0	0	0	0	1	1	no
XLOC_001936	XLOC_001936	OVAAL	chr1:180558975-180566518	Control_1_hr	Zn_1_hr	NOTEST	0.0199556	0	#NAME?	0	1	1	no
XLOC_001937	XLOC_001937	XPR1	chr1:180632003-180890251	Control_1_hr	Zn_1_hr	OK	23.1487	22.9061	-0.0151974	-0.0798324	0.8795	1	no
XLOC_001938	XLOC_001938	RP11-46A10.2	chr1:180906650-180909166	Control_1_hr	Zn_1_hr	NOTEST	0.143344	0.26952	0.910909	0	1	1	no
XLOC_001939	XLOC_001939	KIAA1614	chr1:180913153-181023121	Control_1_hr	Zn_1_hr	OK	0.373241	0.35647	-0.0663272	-0.030807	0.93845	1	no
XLOC_001940	XLOC_001940	RP11-46A10.6	chr1:180913153-181023121	Control_1_hr	Zn_1_hr	NOTEST	0	0.0490296	inf	0	1	1	no
XLOC_001941	XLOC_001941	RP11-46A10.8	chr1:180913153-181023121	Control_1_hr	Zn_1_hr	NOTEST	0.056374	0.117203	1.05591	0	1	1	no
XLOC_001942	XLOC_001942	MR1	chr1:181033424-181061938	Control_1_hr	Zn_1_hr	OK	3.74402	3.73313	-0.00420078	-0.0165039	0.97635	1	no
XLOC_001943	XLOC_001943	IER5	chr1:181088711-181092899	Control_1_hr	Zn_1_hr	OK	20.807	20.1022	-0.0497152	-0.328011	0.55815	1	no
XLOC_001944	XLOC_001944	RP11-540K16.1	chr1:181174483-181182208	Control_1_hr	Zn_1_hr	NOTEST	0	0.0256738	inf	0	1	1	no
XLOC_001945	XLOC_001945	GM140	chr1:181236387-181238604	Control_1_hr	Zn_1_hr	NOTEST	0	0	0	0	1	1	no
XLOC_001946	XLOC_001946	CACNA1E	chr1:181413101-181808084	Control_1_hr	Zn_1_hr	NOTEST	0.0390839	0.0153749	-1.346	0	1	1	no
XLOC_001947	XLOC_001947	Metazoa_SRP	chr1:181413101-181808084	Control_1_hr	Zn_1_hr	NOTEST	0	0	0	0	1	1	no
XLOC_001948	XLOC_001948	RNA5SP70	chr1:181413101-181808084	Control_1_hr	Zn_1_hr	NOTEST	0	0	0	0	1	1	no
XLOC_001949	XLOC_001949	RP11-33M22.2	chr1:181812704-181813261	Control_1_hr	Zn_1_hr	NOTEST	0	0	0	0	1	1	no
XLOC_001950	XLOC_001950	RP11-538D16.3	chr1:182086550-182090112	Control_1_hr	Zn_1_hr	NOTEST	0	0.00829731	inf	0	1	1	no
XLOC_001951	XLOC_001951	RNU6-152P	chr1:182327067-182327174	Control_1_hr	Zn_1_hr	NOTEST	0	0	0	0	1	1	no
XLOC_001952	XLOC_001952	RP11-416K24.1	chr1:182328496-182329007	Control_1_hr	Zn_1_hr	NOTEST	0	0.028121	inf	0	1	1	no
XLOC_001953	XLOC_001953	EIF1P3	chr1:182336000-182336334	Control_1_hr	Zn_1_hr	OK	53.7505	56.4781	0.0714125	0.461768	0.4209	1	no
XLOC_001954	XLOC_001954	LINC00272	chr1:182407620-182414815	Control_1_hr	Zn_1_hr	NOTEST	0	0	0	0	1	1	no
XLOC_001955	XLOC_001955	TEDDM2P	chr1:182441576-182442362	Control_1_hr	Zn_1_hr	NOTEST	0	0	0	0	1	1	no
XLOC_001956	XLOC_001956	RGSL1	chr1:182450120-182560599	Control_1_hr	Zn_1_hr	NOTEST	0.007186	0	#NAME?	0	1	1	no
XLOC_001957	XLOC_001957	RP11-317P15.4	chr1:182615253-182616629	Control_1_hr	Zn_1_hr	NOTEST	0	0.0076774	inf	0	1	1	no
XLOC_001958	XLOC_001958	RP11-317P15.3	chr1:182712861-182714544	Control_1_hr	Zn_1_hr	NOTEST	0	0	0	0	1	1	no
XLOC_001959	XLOC_001959	RP11-317P15.6	chr1:182733791-182734779	Control_1_hr	Zn_1_hr	NOTEST	0	0	0	0	1	1	no
XLOC_001960	XLOC_001960	NPL	chr1:182789292-182830384	Control_1_hr	Zn_1_hr	OK	1.3463	1.12048	-0.264882	-0.411218	0.3827	1	no
XLOC_001961	XLOC_001961	DHX9	chr1:182839368-182887751	Control_1_hr	Zn_1_hr	OK	106.783	103.558	-0.0442318	-0.195619	0.6893	1	no
XLOC_001962	XLOC_001962	LAMC1	chr1:183023459-183145592	Control_1_hr	Zn_1_hr	OK	51.2755	55.3975	0.111551	0.363521	0.51765	1	no
XLOC_001963	XLOC_001963	LAMC2	chr1:183186237-183244900	Control_1_hr	Zn_1_hr	OK	10.0772	9.39468	-0.101181	-0.584758	0.28565	1	no
XLOC_001964	XLOC_001964	RP11-548N1.1	chr1:183248236-183418602	Control_1_hr	Zn_1_hr	NOTEST	0	0	0	0	1	1	no
XLOC_001965	XLOC_001965	SMG7	chr1:183460873-183598246	Control_1_hr	Zn_1_hr	OK	17.7057	17.8782	0.0139895	0.0756648	0.88075	1	no
XLOC_001966	XLOC_001966	RGL1	chr1:183636084-183928531	Control_1_hr	Zn_1_hr	OK	2.12627	2.14999	0.0160063	0.100872	0.86245	1	no
XLOC_001967	XLOC_001967	TSEN15	chr1:184051676-184074212	Control_1_hr	Zn_1_hr	OK	24.2705	24.4369	0.00985832	0.0532786	0.9256	1	no
XLOC_001968	XLOC_001968	Y_RNA	chr1:184315657-184315765	Control_1_hr	Zn_1_hr	NOTEST	0	0	0	0	1	1	no
XLOC_001969	XLOC_001969	RP11-382D12.1	chr1:184329070-184332826	Control_1_hr	Zn_1_hr	NOTEST	0	0	0	0	1	1	no
XLOC_001970	XLOC_001970	RN7SL654P	chr1:184335657-184335949	Control_1_hr	Zn_1_hr	NOTEST	0	0	0	0	1	1	no
XLOC_001971	XLOC_001971	C1orf21	chr1:184387057-184629020	Control_1_hr	Zn_1_hr	OK	8.24402	7.34033	-0.167504	-0.633328	0.2546	1	no
XLOC_001972	XLOC_001972	GS1-115G20.1	chr1:184387057-184629020	Control_1_hr	Zn_1_hr	NOTEST	0	0.0384966	inf	0	1	1	no
XLOC_001973	XLOC_001973	GS1-115G20.2	chr1:184387057-184629020	Control_1_hr	Zn_1_hr	NOTEST	0	0	0	0	1	1	no
XLOC_001974	XLOC_001974	GS1-120K12.4	chr1:185001526-185008683	Control_1_hr	Zn_1_hr	NOTEST	0	0	0	0	1	1	no
XLOC_001975	XLOC_001975	RNF2	chr1:185045363-185102608	Control_1_hr	Zn_1_hr	OK	9.80454	10.1151	0.0449838	0.177714	0.7568	1	no
XLOC_001976	XLOC_001976	SWT1	chr1:185157079-185291765	Control_1_hr	Zn_1_hr	OK	1.30662	1.18134	-0.14541	-0.229034	0.6804	1	no
XLOC_001977	XLOC_001977	Y_RNA	chr1:185157079-185291765	Control_1_hr	Zn_1_hr	NOTEST	0	0	0	0	1	1	no
XLOC_001978	XLOC_001978	Y_RNA	chr1:185157079-185291765	Control_1_hr	Zn_1_hr	NOTEST	0	0	0	0	1	1	no
XLOC_001979	XLOC_001979	RP4-635A23.4	chr1:185157079-185291765	Control_1_hr	Zn_1_hr	NOTEST	0.016808	0.0217382	0.371082	0	1	1	no
XLOC_001980	XLOC_001980	GS1-279B7.2	chr1:185317778-185318530	Control_1_hr	Zn_1_hr	NOTEST	0.19204	0.285157	0.570348	0	1	1	no
XLOC_001981	XLOC_001981	RNU7-183P	chr1:185434243-185434305	Control_1_hr	Zn_1_hr	NOTEST	0	0	0	0	1	1	no
XLOC_001982	XLOC_001982	FAM195DP	chr1:185435838-185436047	Control_1_hr	Zn_1_hr	NOTEST	0	0	0	0	1	1	no
XLOC_001983	XLOC_001983	GS1-204I12.3	chr1:185518650-185520986	Control_1_hr	Zn_1_hr	NOTEST	0	0	0	0	1	1	no
XLOC_001984	XLOC_001984	GS1-204I12.4	chr1:185655001-185657168	Control_1_hr	Zn_1_hr	NOTEST	0.0261259	0.0787206	1.59126	0	1	1	no
XLOC_001985	XLOC_001985	HMCN1	chr1:185734550-186190949	Control_1_hr	Zn_1_hr	NOTEST	0.00418168	0.0290642	2.79709	0	1	1	no
XLOC_001986	XLOC_001986	PRG4	chr1:186296278-186375693	Control_1_hr	Zn_1_hr	NOTEST	0.104754	0.0505062	-1.05247	0	1	1	no
XLOC_001987	XLOC_001987	C1orf27	chr1:186375757-186421378	Control_1_hr	Zn_1_hr	OK	12.3388	12.2374	-0.0119032	-0.0594005	0.9172	1	no
XLOC_001988	XLOC_001988	OCLM	chr1:186375757-186421378	Control_1_hr	Zn_1_hr	NOTEST	0.310627	0.138446	-1.16586	0	1	1	no
XLOC_001989	XLOC_001989	RP11-295K2.3	chr1:186435160-186470291	Control_1_hr	Zn_1_hr	NOTEST	0	0.122702	inf	0	1	1	no
XLOC_001990	XLOC_001990	GS1-304P7.3	chr1:186521772-186522304	Control_1_hr	Zn_1_hr	NOTEST	0	0	0	0	1	1	no
XLOC_001991	XLOC_001991	GS1-304P7.2	chr1:186578278-186579299	Control_1_hr	Zn_1_hr	NOTEST	0	0	0	0	1	1	no
XLOC_001992	XLOC_001992	AL096803.1	chr1:186586186-186586269	Control_1_hr	Zn_1_hr	NOTEST	0	0	0	0	1	1	no
XLOC_001993	XLOC_001993	PACERR	chr1:186680621-186681446	Control_1_hr	Zn_1_hr	OK	1.3661	1.18663	-0.2032	-0.463426	0.4206	1	no
XLOC_001994	XLOC_001994	PLA2G4A	chr1:186828952-186988981	Control_1_hr	Zn_1_hr	OK	18.6963	17.8756	-0.0647645	-0.417411	0.46415	1	no
XLOC_001995	XLOC_001995	LINC01036	chr1:187092841-187360323	Control_1_hr	Zn_1_hr	NOTEST	0.0188437	0.0237597	0.334435	0	1	1	no
XLOC_001996	XLOC_001996	LINC01037	chr1:187443605-187477222	Control_1_hr	Zn_1_hr	NOTEST	0.0534835	0	#NAME?	0	1	1	no
XLOC_001997	XLOC_001997	RP11-445P19.3	chr1:187480292-187480614	Control_1_hr	Zn_1_hr	NOTEST	0	0	0	0	1	1	no
XLOC_001998	XLOC_001998	FDPSP1	chr1:187563060-187564131	Control_1_hr	Zn_1_hr	OK	16.6115	16.5117	-0.00868563	-0.0607665	0.9123	1	no
XLOC_001999	XLOC_001999	RP11-393M18.5	chr1:187632165-187632439	Control_1_hr	Zn_1_hr	NOTEST	0	0	0	0	1	1	no
[truncated: 111,213 more rows]
