# Supplementary material for: Zinc intoxication induces ferroptosis in A549 human lung cells
Source: Royal Society of Chemistry journal article supplement (doi:10.1039/c8mt00360b), 2019-04-10
Supplement: c8mt00360b4.pdf [file c8mt00360b4.pdf]

Electronic supplementary information (ESI)

**Zinc intoxication induces ferroptosis in A549 human lung cells**

Lauren D. Palmer, Ashley T. Jordan, K. Nichole Maloney, Melissa A. Farrow, Danielle B. Gutierrez, Randi Gant-Branum, William J. Burns, Carrie E. Romer, Tina Tsui, Jamie L. Allen, William N. Beavers, Yuan-Wei Nei, Stacy D. Sherrod, D. Borden Lacy, Jeremy L. Norris, John A. McLean, Richard M. Caprioli, Eric P. Skaar\*

\*eric.skaar@vumc.org

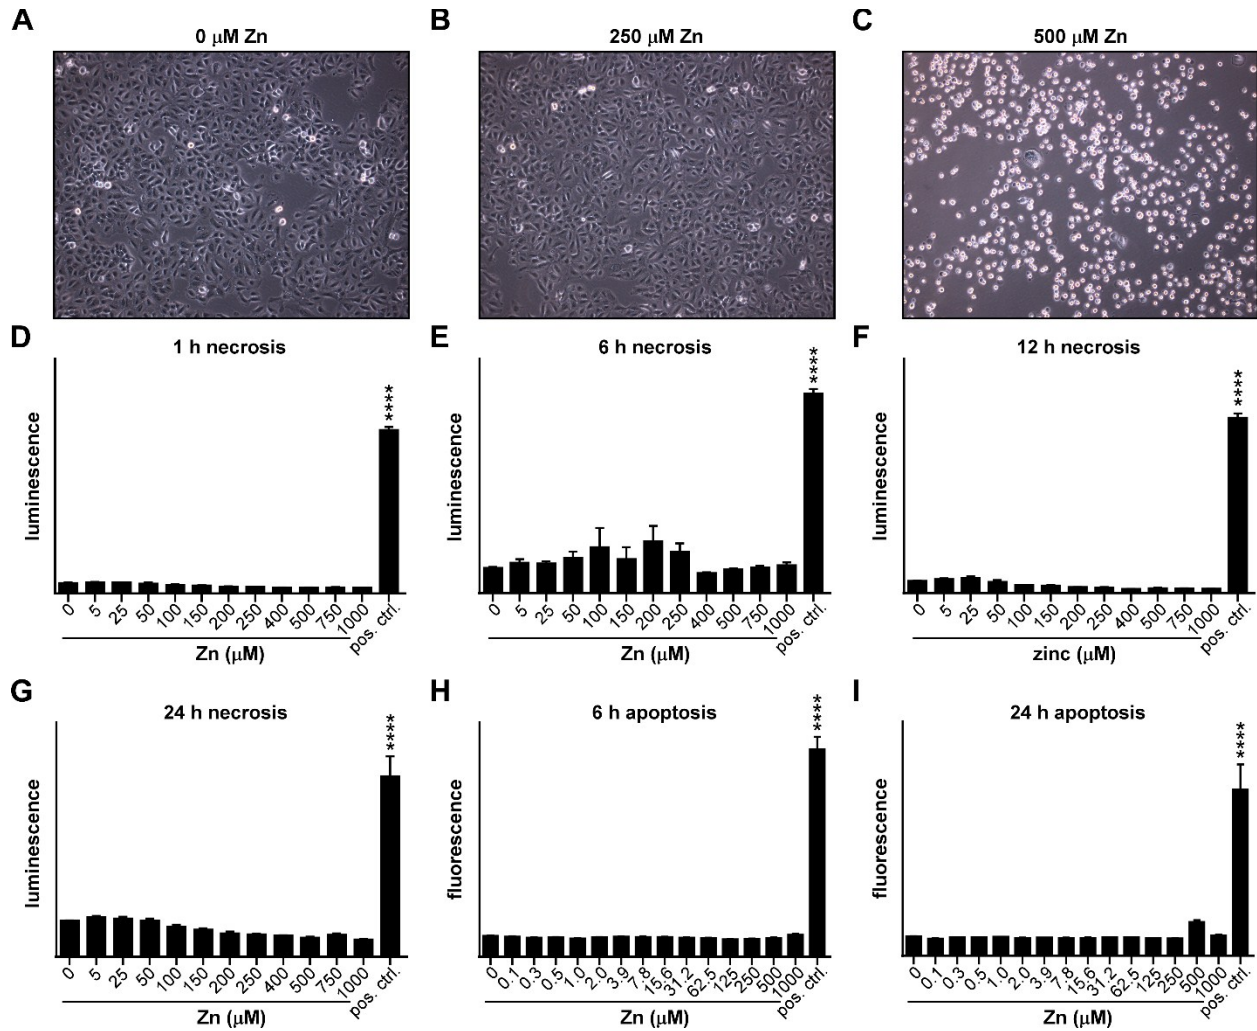

**Figure S1: Zinc does not induce apoptosis or necrosis.** (A-C) Representative images of A549 cells 24 h after treatment with 0, 250, or 500 µM zinc. (D-G) Necrosis at 1, 6, 12 and 24 h by measurement of lactate dehydrogenase release by CytoTox-Glo. (H-I) Apoptosis at 6 h and 24 h by measurement of caspase-3/7 cleavage by ApoOne. Statistics are by ANOVA with Sidak's multiple comparisons to test significant increase in signal compared to 0 µM zinc.

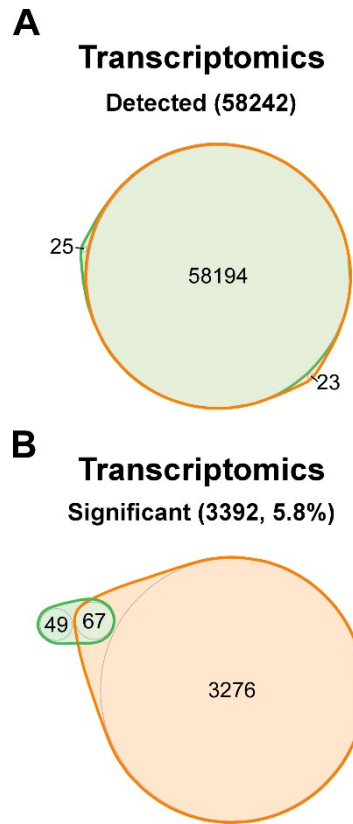

**Figure S2: Transcriptomics data over time.** (A) Detected transcripts are displayed across time.

(B) Significantly changed transcripts are displayed across time.

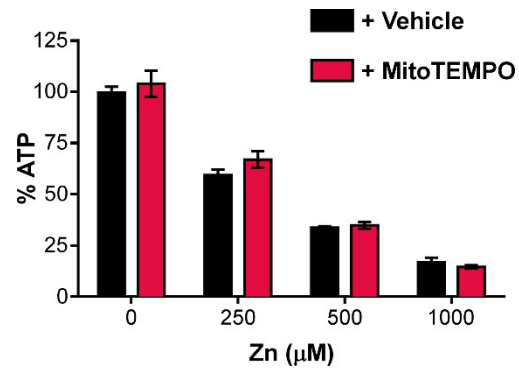

**Figure S3: Addition of MitoTEMPO does not rescue viability of A549 cells intoxicated with zinc.** A549 cells were treated with Zn (0-1000 μM) and MitoTEMPO (100 μM) overnight and viability was assessed. No significant difference between vehicle and MitoTEMPO treated conditions by two-way ANOVA with Sidak's multiple comparisons.

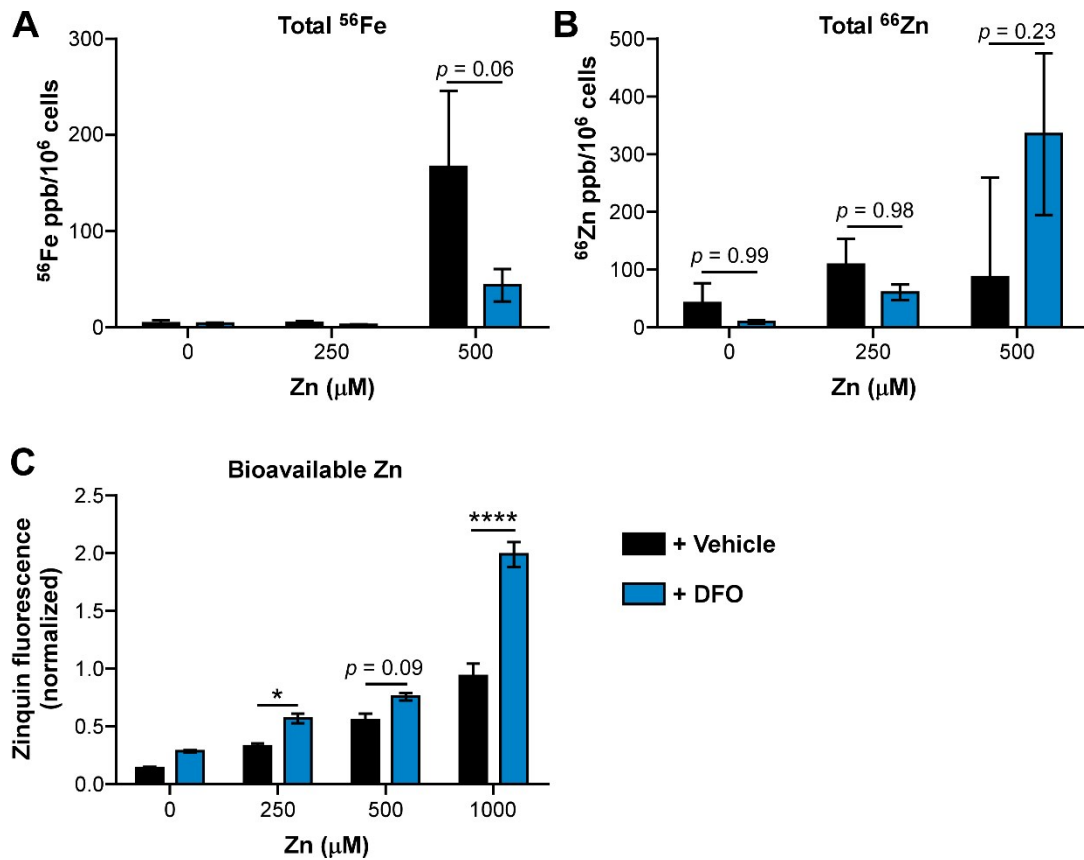

**Figure S4: Desferoxamine treatment does not decrease total or bioavailable zinc.** A549 cells were pre-treated with ddH<sub>2</sub>O (vehicle) or desferoxamine (DFO; 100  $\mu\text{M}$ ) 30 min prior to Zn intoxication. (A-B)  $^{56}\text{Fe}$  and  $^{66}\text{Zn}$  were measured by inductively coupled mass spectrometry. (C) Bioavailable Zn was measured by Zinquin fluorescence normalized to SytoOrange 82 fluorescence. Statistics indicated are two-way ANOVA with Sidak's multiple comparisons.
